# Supplementary material
Source: PubMed Central journal article supplement (PMC10076952)
Supplement: noac261_suppl_supplementary_materials.pdf [file noac261_suppl_supplementary_materials.pdf]

*Supplementary material for*

**Inhibition of integrated stress response protects against lipid-Induced senescence in hypothalamic neural stem cells in adamantinomatous craniopharyngioma**

Chaohu Wang\*<sup>1</sup>, Huarong Zhang\*<sup>1</sup>, Jun Fan\*<sup>1</sup>, Qing Li\*<sup>2</sup>, Rongrong Guo\*<sup>1</sup>, Jun Pan<sup>1</sup>, Yawei Liu<sup>1,3</sup>, Junxiang Peng<sup>1</sup>, Qianchao Zhu<sup>1</sup>, Yiwen Feng<sup>1</sup>, Chengdong Wu<sup>1</sup>, Peng Luo<sup>1</sup>, Xiaoyu Qiu<sup>1</sup>, Jin Shi<sup>1</sup>, Yingying Deng<sup>1</sup>, Songtao Qi#<sup>1</sup>, Yi Liu#<sup>1</sup>

**Overview on Supplementary material:**

- **Supplementary Figures**
  - **Supplementary Figure 1. No significant nerve damage of hypothalamus is found in glioma, meningioma, and papillary craniopharyngioma (PCP) of the sellar region.**
  - **Supplementary Figure 2. Microglia infiltration is closely related to the nerve damage of third ventricle floor (3VF).**
  - **Supplementary Figure 3. Cystic fluid of ACP activates the microglia and causes hypothalamic damage in the mouse models.**
  - **Supplementary Figure 4. Hypothalamic neural stem cells (htNSCs) are recruited to the damaged 3VF adjacent to ACP.**
  - **Supplementary Figure 5. Recruited htNSCs maybe derived from tanycytes.**
  - **Supplementary Figure 6. Nearly no neuronal differentiation occur in the recruited htNSCs.**
  - **Supplementary Figure 7. Part of the recruited htNSCs expresses**

Protect against lipid-induced htNSC senescence in ACP

**markers of oligodendrocyte precursors.**

- **Supplementary Figure 8. Activated p16 senescence signaling pathway primarily occurs in ACP rather than htNSCs.**
- **Supplementary Figure 9. ACP tissues and cystic fluid are rich in high concentration of lipids.**
- **Supplementary Figure 10. ACP is in an aberrant metabolic state of high synthesis and high efflux of cholesterol.**
- **Supplementary Figure 11. Recruited htNSCs expresses high levels of scavenger receptor CD36.**
- **Supplementary Figure 12. Characterization of mouse htNSCs.**
- **Supplementary Figure 13. Schematic diagrams of the cystic fluid purification, experimental design, and experimental timelines.**
- **Supplementary Figure 14. SSO inhibits the senescence induced by ox-LDL in mouse htNSCs.**
- **Supplementary Figure 15. LD aggregation induced by ox-LDL is inhibited by SSO in the cultured htNSCs.**
- **Supplementary Figure 16. SSO inhibits the lipid peroxidation induced by ox-LDL in the mouse htNSCs.**
- **Supplementary Figure 17. SSO inhibits mitochondrial damage induced by ox-LDL in the mouse htNSCs.**
- **Supplementary Figure 18. Characterization of senescence characteristics in htNSCs acquired from the 3VF adjacent to ACP, removing the interference of  $\beta$ -catenin-accumulating clusters.**
- **Supplementary Figure 19. Integrated stress response (ISR) signaling pathway is activated in lipotoxic htNSCs.**
- **Supplementary Figure 20. ISR inhibitors block the senescence of mouse htNSCs induced by ox-LDL.**
- **Supplementary Figure 21. ISR inhibitors cannot block the accumulation of LDs in htNSCs induced by ox-LDL.**
- **Supplementary Figure 22. Oxytocin (OXT) blocks ox-LDL induced**

Protect against lipid-induced htNSC senescence in ACP

**senescence of htNSCs by inhibiting ISR signaling.**

- Supplementary Figure 23. **Blood–brain barrier (BBB) is damaged in the 3VF adjacent to ACP.**
- Supplementary Figure 24. **OXT blocks the ox-LDL–induced senescence of NSCs in the ME of mice.**
- Supplementary Figure 25. **OXT blocks the ox-LDL-induced cognitive function descending of mouse models.**
- Graphical Abstract. **Molecular mechanism by which OXT avoids the senescence of htNSCs induced by ox-LDL.**
  
- **Supplementary Tables**
  - Supplementary Table 1. **List of the antibodies used for immunofluorescence and immunohistochemical stainings.**
  - Supplementary Table 2. **List of the antibodies used for Western blot.**
  - Supplementary Table 3. **Secondary antibodies and conjugated fluorophores used in this study.**
  - Supplementary Table 4. **Primers for Quantitative real-time PCR used in this study.**
  - Supplementary Table 5. **Chemicals, peptides, recombinant proteins, and critical commercial assays used in this study.**
  - Supplementary Table 6. **Software used in this study.**
  - Supplementary Table 7. **Gene list of differentially expressed genes (DEGs) between htNSCs and NSCs of SVZ.**
  
- **Materials and Methods**
  - Patients and Clinical Samples
  - Lipid detection in Cyst and Cerebrospinal Fluids
  - Histology and Immunofluorescence Staining
  - BODIPY 493/503 Staining
  - Oil Red O Staining and Filipin Staining

## Protect against lipid-induced htNSC senescence in ACP

- Purification of CD133<sup>+</sup> NSCs
- Transmission Electron Microscopy (TEM)
- Gas Chromatography
- Sample Collection and RNA-seq Analysis Preparation
- Clustering and Sequencing
- Quality Control
- Reads Mapping To the Reference Genome
- Quantification of Gene Expression Levels
- Differential Expression Analysis
- Primary Cell Culture
- HtNSCs Characterization and Lipid Content Assays
- Immunocytochemistry (ICC)
- Western Blot
- RNA Extraction and Quantitative real-time PCR
- Animals Models
- Morris Water Maze (MWM)
- Mitochondria Fragmentation and Surface Area Assay
- Quantitative Analysis of Immunohistological Data
- Statistical Analysis



Supplementary Figures

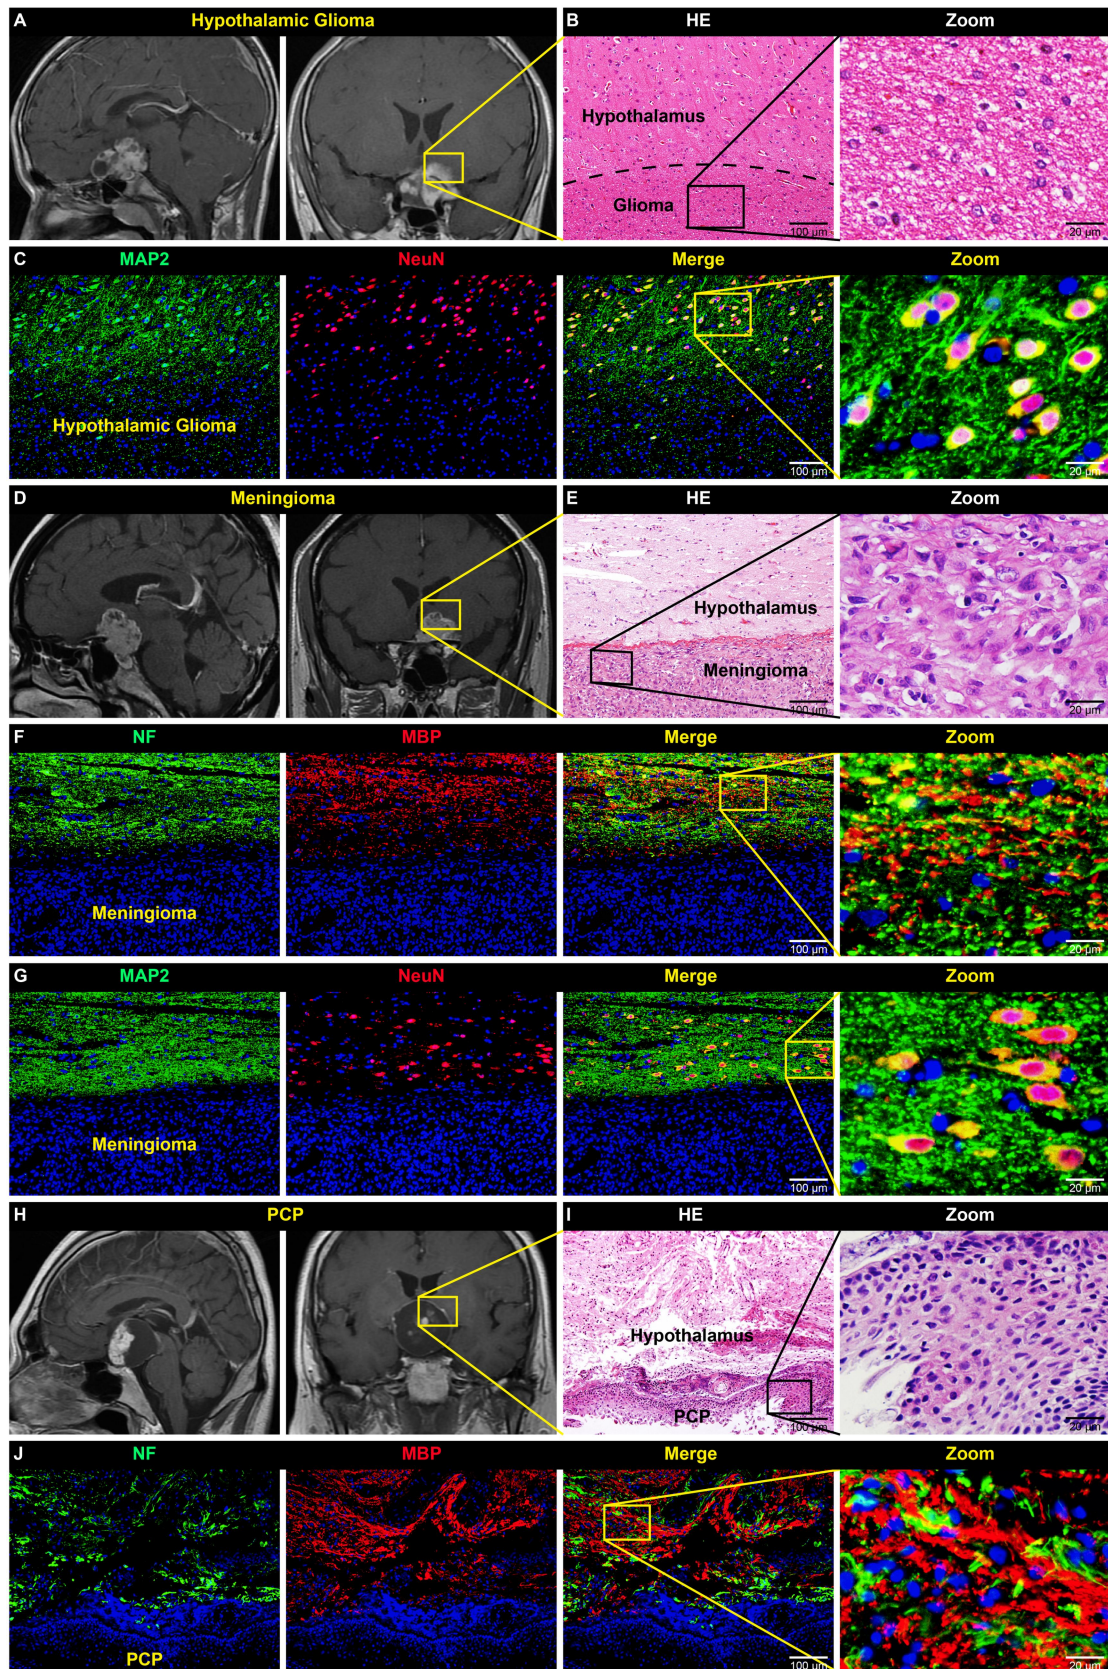

**Supplementary Figure 1. No significant nerve damage of hypothalamus is found in glioma, meningioma, and papillary craniopharyngioma (PCP) of the sellar region.** (A and B) Representative sagittal and coronal contrast-enhanced T1-weighted MR images (A) obtained before surgery and hematoxylin and eosin staining (H&E; B) obtained post-operation from a hypothalamic glioma patient. Boxed area is enlarged and presented on the right. (C) Immunofluorescence staining of nine hypothalamic glioma tissue samples, representative images of microtubule-associated protein 2 (MAP2) and NeuN co-staining. Boxed area is enlarged and presented on the right. (D and E) Representative sagittal and coronal contrast-enhanced T1-weighted MR images (D) obtained before surgery and H&E staining (E) obtained post-operation from a tuberculum sellae meningioma patient. Boxed area is enlarged and presented on the right. (F) Immunofluorescence staining of eight tuberculum sellae meningioma tissue samples, representative images of neurofilament (NF) and myelin basic protein (MBP) co-staining. Boxed area is enlarged and presented on the right. (G) Immunofluorescence staining of eight tuberculum sellae meningioma tissue samples, representative images of MAP2 and NeuN co-staining. Boxed area is enlarged and presented on the right. (H and I) Representative sagittal and coronal contrast-enhanced T1-weighted MR images (H) obtained before surgery and H&E staining (I) obtained post-operation from a PCP patient. Boxed area is enlarged and presented on the right. (J) Immunofluorescence staining of twelve PCP tissue samples, representative images of NF and MBP co-staining.



Protect against lipid-induced htNSC senescence in ACP

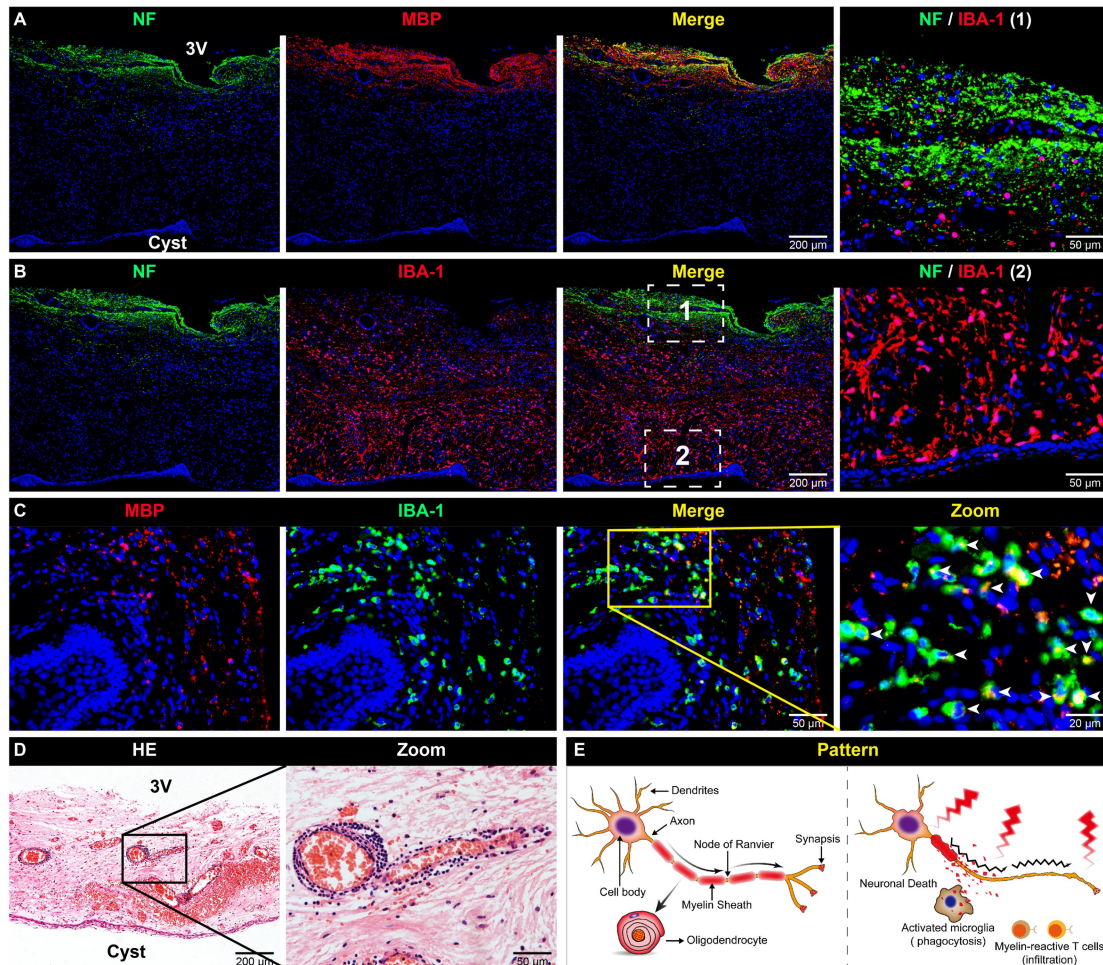

**Supplementary Figure 2. Microglia infiltration is closely related to the nerve damage of third ventricle floor (3VF).** (A) Representative dual immunofluorescence images of NF and MBP in ACP tissue samples. (B) Representative dual immunofluorescence images of NF and IBA-1 in ACP tissue samples. Boxed area is enlarged and presented in right panels. (C) Double immunofluorescence staining of ACP tissue samples, representative images of MBP and IBA-1 staining. White arrows represent the microglia that engulfs the myelin sheath. Boxed area is enlarged and presented on the right. (D) H&E staining of ACP tissue sections. representative images showing the lymphatic vascular sheath in the 3VF adjacent to ACP. Boxed area is enlarged and presented on the right. (E) Schematic diagram showing the structure of a neuron and the potential mechanism of neuronal damage may be that microglia and other immune cells engulf neuronal axons, leading to myelin disintegration and eventually neuronal death.

# Protect against lipid-induced htNSC senescence in ACP

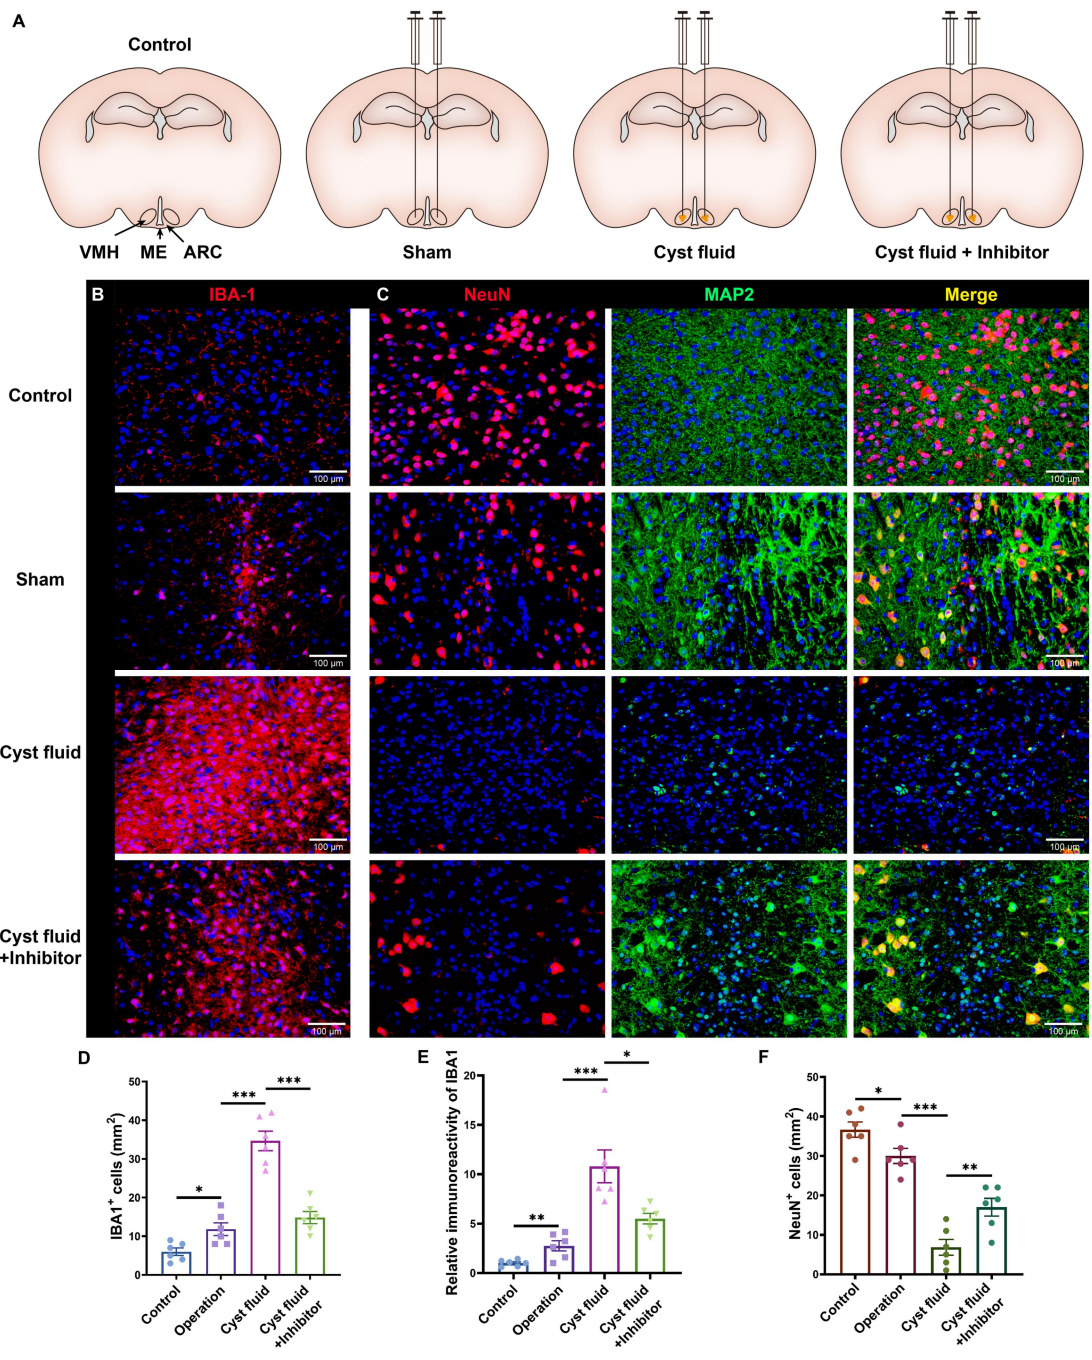

**Supplementary Figure 3. Cystic fluid of ACP activates the microglia and causes hypothalamic damage in the mouse models.** (A) Schematic diagram showing the procedure of animal experiment. (B) Activation of hypothalamic microglia induced by cystic fluid of ACP was confirmed by immunofluorescence staining of IBA-1, and inhibition of NF- $\kappa$ B signaling (BAY 11-7082) reduced the activation of microglia caused by cystic fluid of ACP. (C) Hypothalamic damage was verified by dual immunofluorescence staining of NeuN and MAP2, and NF- $\kappa$ B signaling inhibitor (BAY 11-7082) alleviated the hypothalamic damage caused by cystic fluid of ACP. (D) Quantification of the IBA-1<sup>+</sup> microglia in the hypothalamus of mice described in (B) (n = 6/group). (E) Quantification of the IBA-1 fluorescence intensity in the hypothalamus of mice described in (B) (n = 6/group). (F) Quantification of the NeuN<sup>+</sup> neurons in the hypothalamus of mice described in (C) (n = 6/group). Data are presented as the mean  $\pm$  standard error of mean (SEM). \* $p$  < 0.05, \*\* $p$  < 0.01, \*\*\* $p$  < 0.001, NS: not significant. Statistical analysis: (D–F) one-way ANOVA followed by Fisher's LSD *post hoc* multiple comparison test.



## Protect against lipid-induced htNSC senescence in ACP

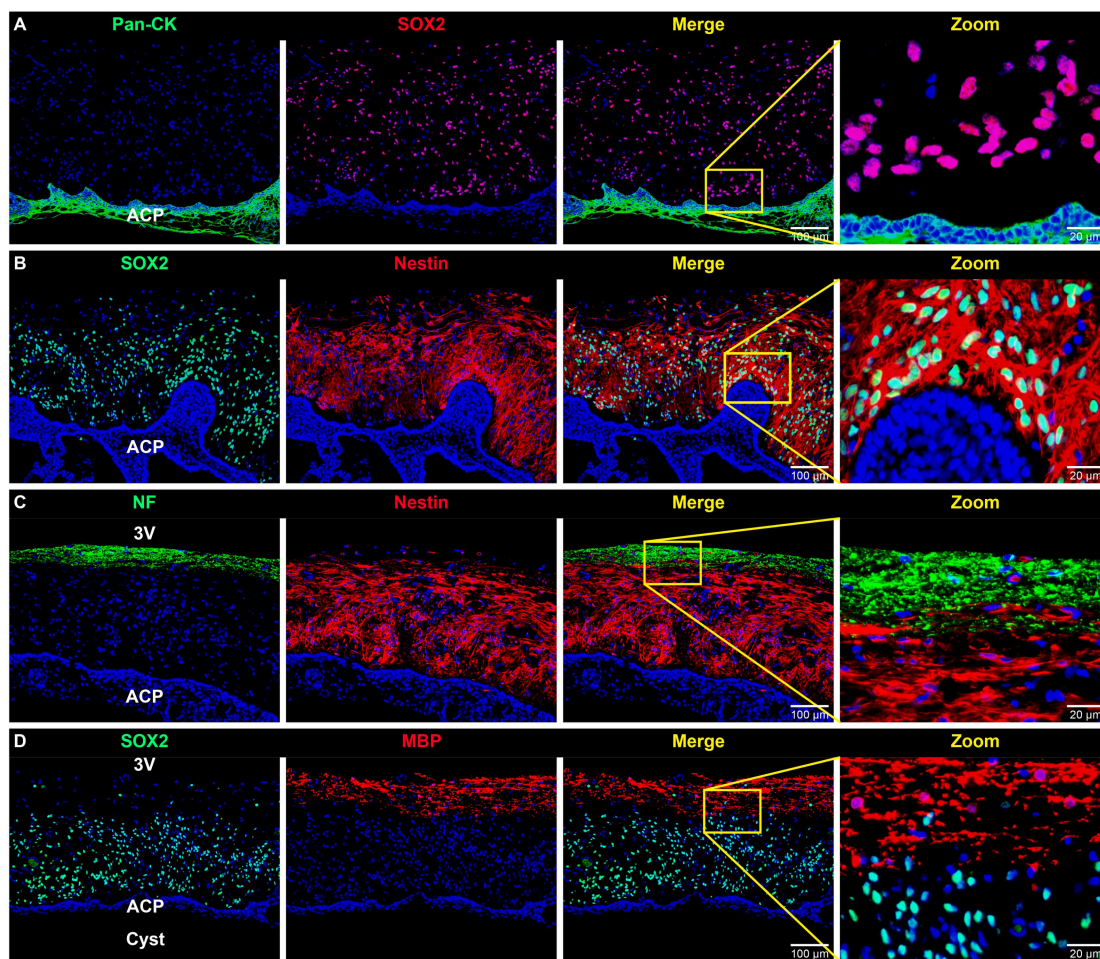

**Supplementary Figure 4. Hypothalamic neural stem cells (htNSCs) are recruited to the damaged 3VF adjacent to ACP.** (A) Immunofluorescence staining of ACP tissue samples, representative images of Pan-CK and SOX2 staining. Boxed area is enlarged and presented on the right. (B) Immunofluorescence staining of ACP tissue samples, representative images of SOX2 and Nestin staining. Boxed area is enlarged and presented on the right. (C) Immunofluorescence staining of ACP tissue samples, representative images of NF and Nestin staining. Boxed area is enlarged and presented on the right. (D) Immunofluorescence staining of ACP tissue samples, representative images of SOX2 and MBP staining. Boxed area is enlarged and presented on the right.

# Protect against lipid-induced htNSC senescence in ACP

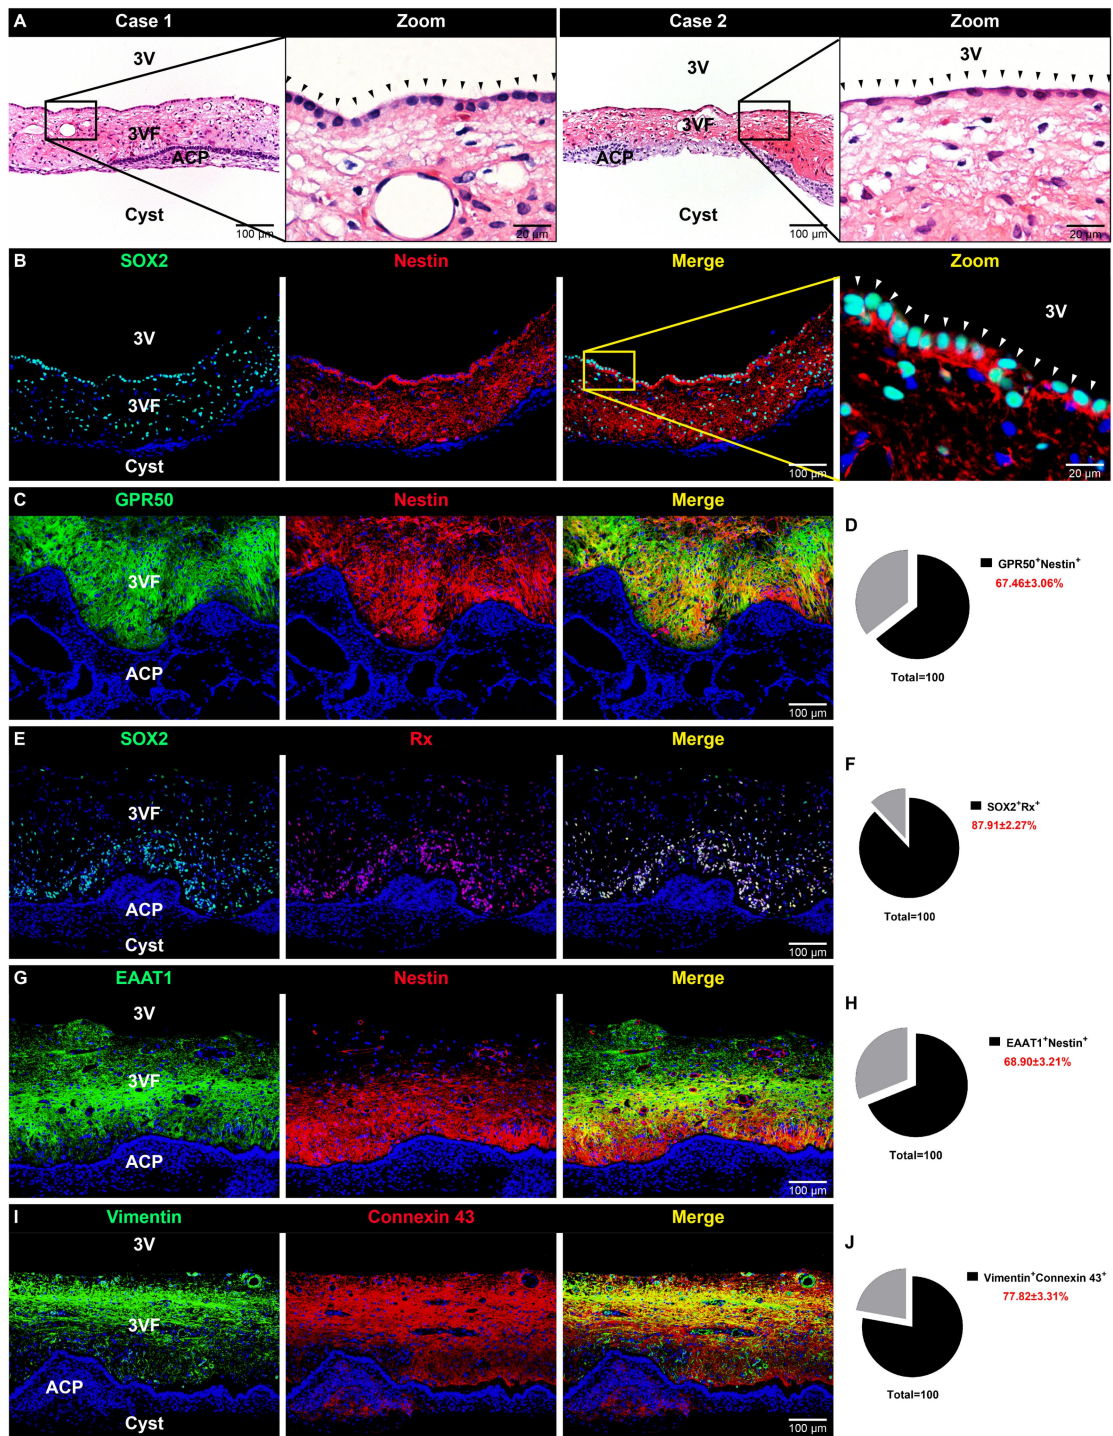

**Supplementary Figure 5. Recruited htNSCs maybe derived from tanycytes.** (A) H&E staining of two ACP tissue samples, representative images are shown. Black arrows indicate the ependymal layer of 3VF. Boxed area is enlarged and presented on the right. (B) Immunofluorescence staining of ACP tissue samples; representative images of SOX2 and Nestin staining. White arrows indicate the ependymal layer of 3VF. Boxed area is enlarged and presented on the right. (C and D) Immunofluorescence staining of ACP tissue samples, representative images of GPR50 and Nestin staining (C), and quantification of Nestin<sup>+</sup>GPR50<sup>+</sup> cells in 3VF adjacent to ACP (D, n = 11). (E and F) Immunofluorescence staining of ACP tissue samples, representative images of SOX2 and Rx staining (E), and quantification of SOX2<sup>+</sup>Rx<sup>+</sup> cells in 3VF adjacent to ACP (F, n = 11). (G and H) Immunofluorescence staining of ACP tissue samples, representative images of EAAT1 and Nestin staining (G), and quantification of EAAT1<sup>+</sup>Nestin<sup>+</sup> cells in 3VF adjacent to ACP (H, n = 11). (I and J) Immunofluorescence staining of ACP tissue samples, representative images of Vimentin and Connexin 43 staining (I), and quantification of Vimentin<sup>+</sup>Connexin 43<sup>+</sup> cells in 3VF adjacent to ACP (J, n = 11). Data are presented as the mean  $\pm$  SEM.



## Protect against lipid-induced htNSC senescence in ACP

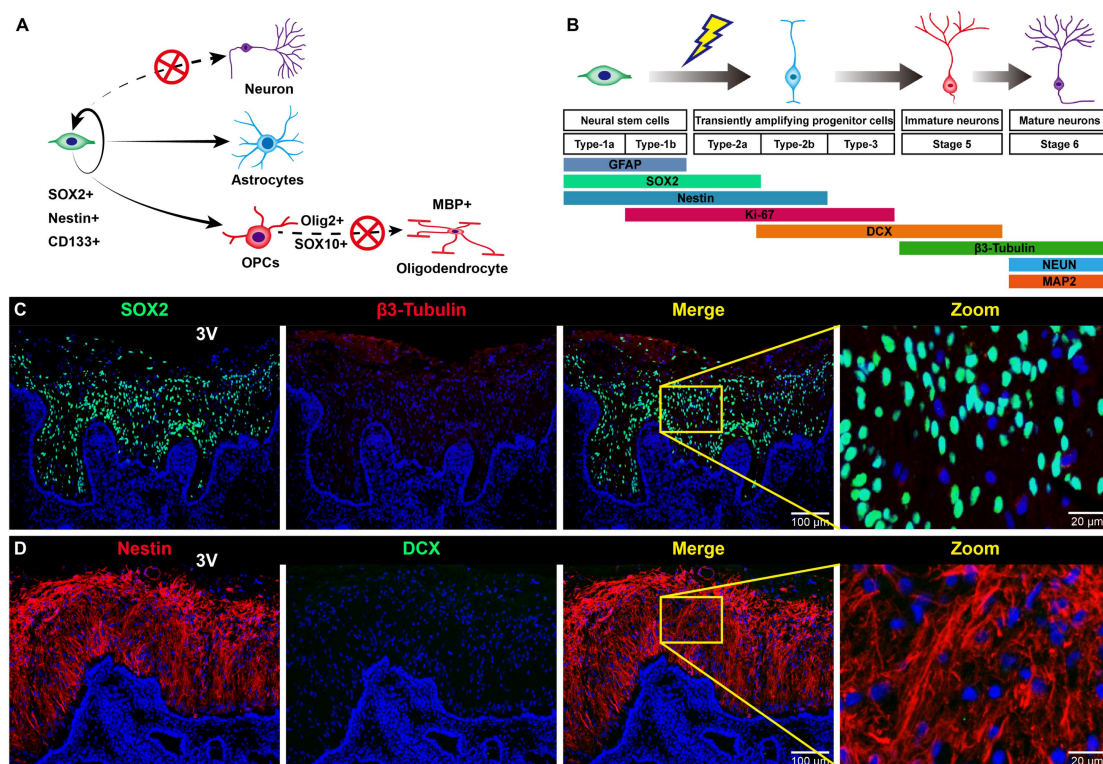

**Supplementary Figure 6. Nearly no neuronal differentiation occur in the recruited htNSCs. (A)** Schematic diagram showing the self-renewal and multi-directional differentiation ability of NSCs. **(B)** Schematic diagram showing stages of adult NSC neurogenesis and cell lineage-specific markers. **(C and D)** Double immunofluorescence staining of ACP tissue samples; representative images of (C) SOX2 and  $\beta$ 3-Tubulin, and (D) Nestin and DCX staining. Boxed area is enlarged and presented on the right. DCX, doublecortin.

# Protect against lipid-induced htNSC senescence in ACP

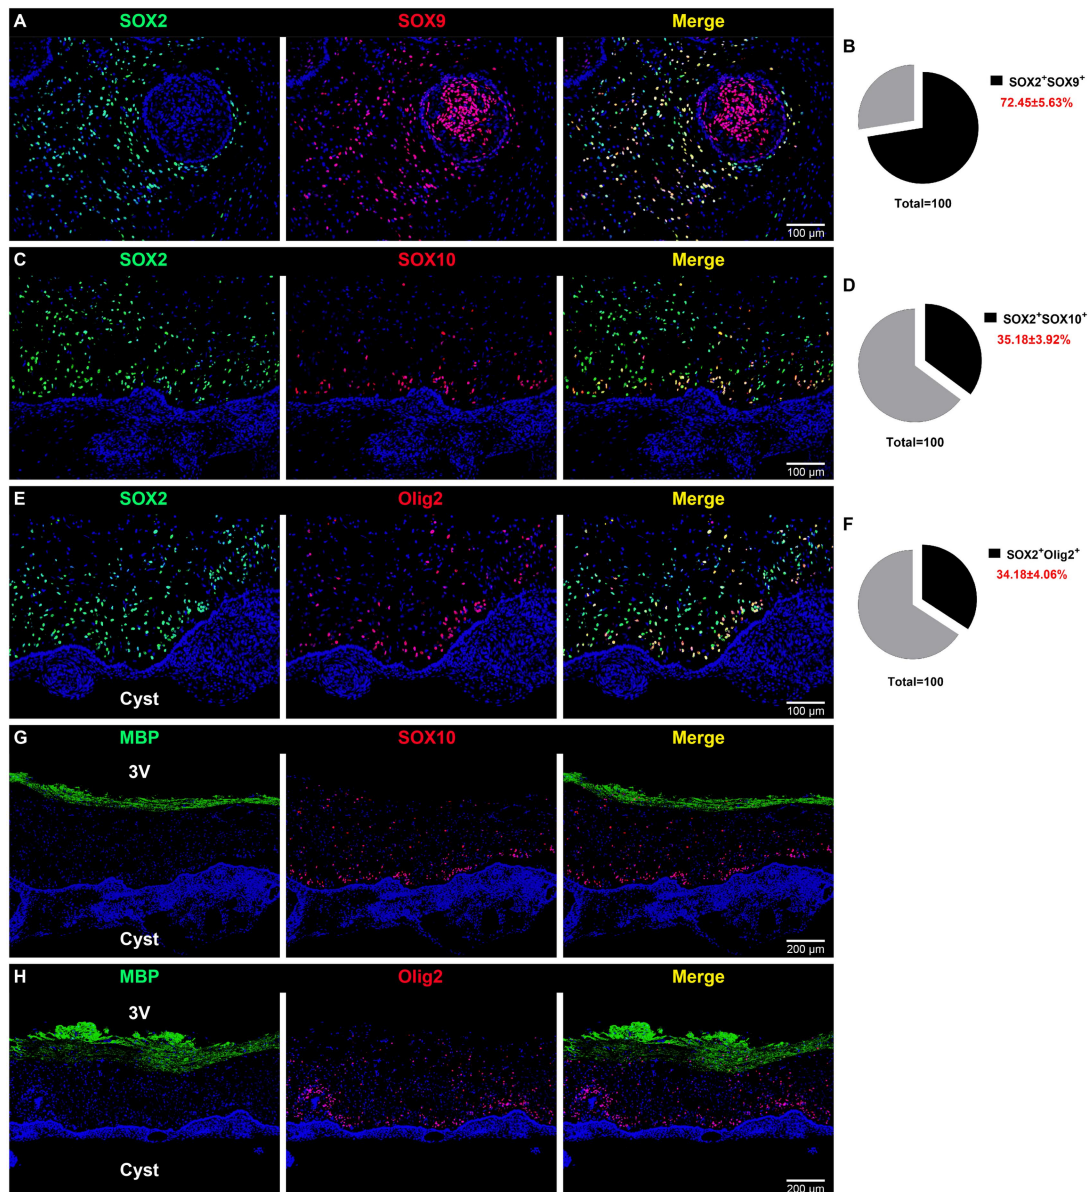

**Supplementary Figure 7. Part of the recruited htNSCs expresses markers of oligodendrocyte precursors.** (A and B) Immunofluorescence staining of ACP tissue samples, representative images of SOX2 and SOX9 staining (A), and quantification of SOX2<sup>+</sup>SOX9<sup>+</sup> cells (B, n = 11). (C and D) Immunofluorescence staining of ACP tissue samples, representative images of SOX2 and SOX10 staining (C), and quantification of SOX2<sup>+</sup>SOX10<sup>+</sup> cells (D, n = 11). (E and F) Immunofluorescence staining of ACP tissue samples, representative images of SOX2 and Olig2 staining (E), and quantification of SOX2<sup>+</sup>Olig2<sup>+</sup> cells (F, n = 11). (G and H) Immunofluorescence staining of ACP tissue samples, representative images showing the co-expression of MBP with different markers of oligodendrocyte precursors (SOX10, G; Olig2, H). Data are presented as the mean ± SEM.

# Protect against lipid-induced htNSC senescence in ACP

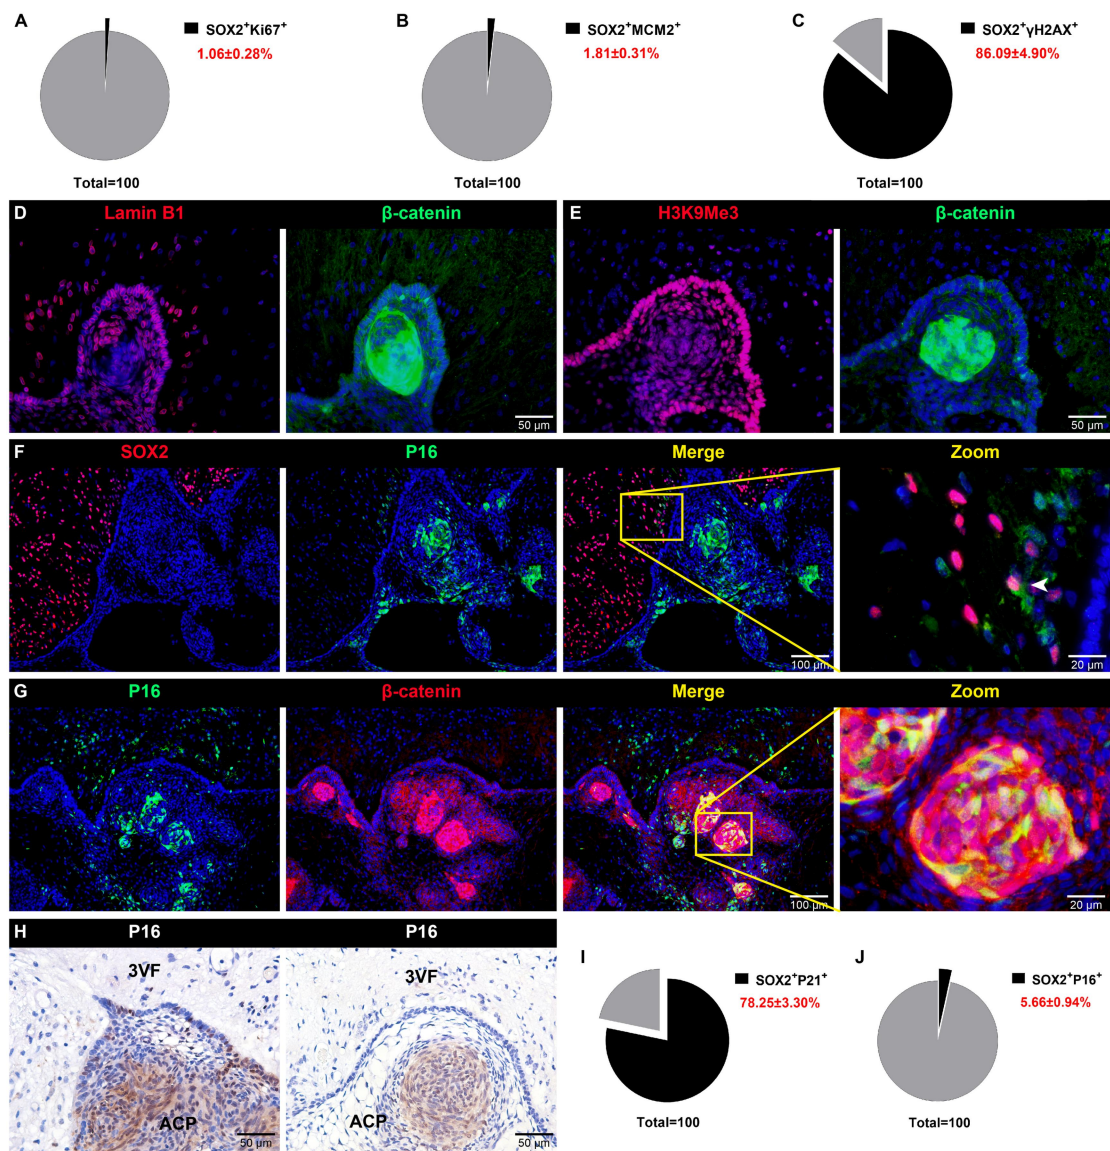

**Supplementary Figure 8. Activated p16 senescence signaling pathway primarily occurs in ACP rather than htNSCs.** (A–C) Quantification of double staining for SOX2 with Ki-67 (A, n = 16), MCM2 (B, n = 16) and  $\gamma$ -H2AX (C, n = 11). (D) Immunofluorescence staining of ACP tissue samples, representative images of Lamin B1 and  $\beta$ -catenin staining. (E) Immunofluorescence staining of ACP tissue samples, representative images of H3K9Me3 and  $\beta$ -catenin staining. (F) Immunofluorescence staining of ACP tissue samples, representative images of SOX2 and P16 staining. Boxed area is enlarged and presented on the right. (G) Immunofluorescence staining of ACP tissue samples; representative images of P16 and  $\beta$ -catenin staining. Boxed area is enlarged and presented on the right. (H) Immunohistochemical staining of ACP tissue samples; representative images of P16 staining. (I and J) Quantification of double staining for SOX2 with P21 (I, n = 16) and P16 (J, n = 16). Data are presented as the mean  $\pm$  SEM.



## Protect against lipid-induced htNSC senescence in ACP

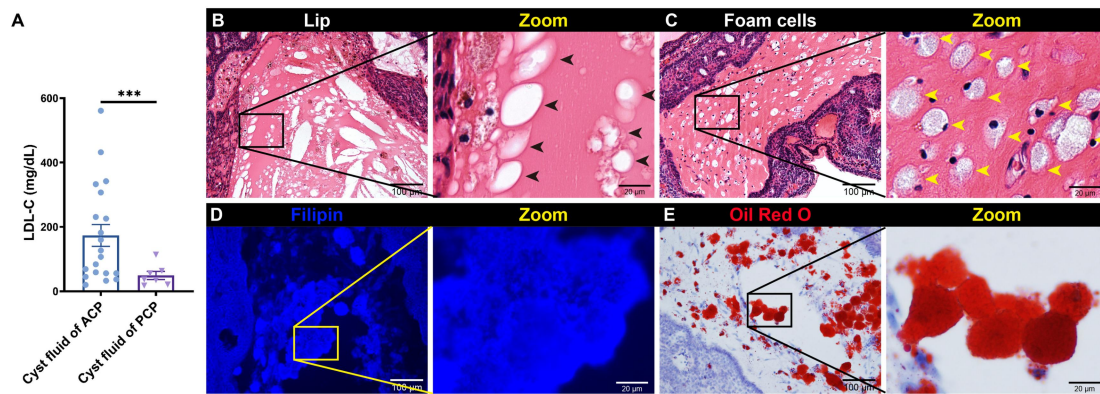

**Supplementary Figure 9. ACP tissues and cystic fluid are rich in high concentration of lipids.** (A) Quantification of low density lipoprotein-cholesterol (LDL-C) levels in the cystic fluid of ACP (n = 20) and PCP (n = 7). (B and C) H&E staining of ACP tissue sections; representative images showing fat vacuoles (black arrows; B) and foam cells (yellow arrows; C) in ACP tissue sections. Boxed area is enlarged and presented on the right. (D) Representative images of Filipin staining in ACP tissue samples. Boxed area is enlarged and presented on the right. (E) Representative images of Oil red O (ORO) staining showing the existence of lipid droplets (LDs) in ACP tissue samples. Boxed area is enlarged and presented on the right. Data are presented as the mean  $\pm$  SEM. \* $p < 0.05$ , \*\* $p < 0.01$ , \*\*\* $p < 0.001$ , NS: not significant. Statistical analysis: (A) two-tailed Student's unpaired t-test.

# Protect against lipid-induced htNSC senescence in ACP

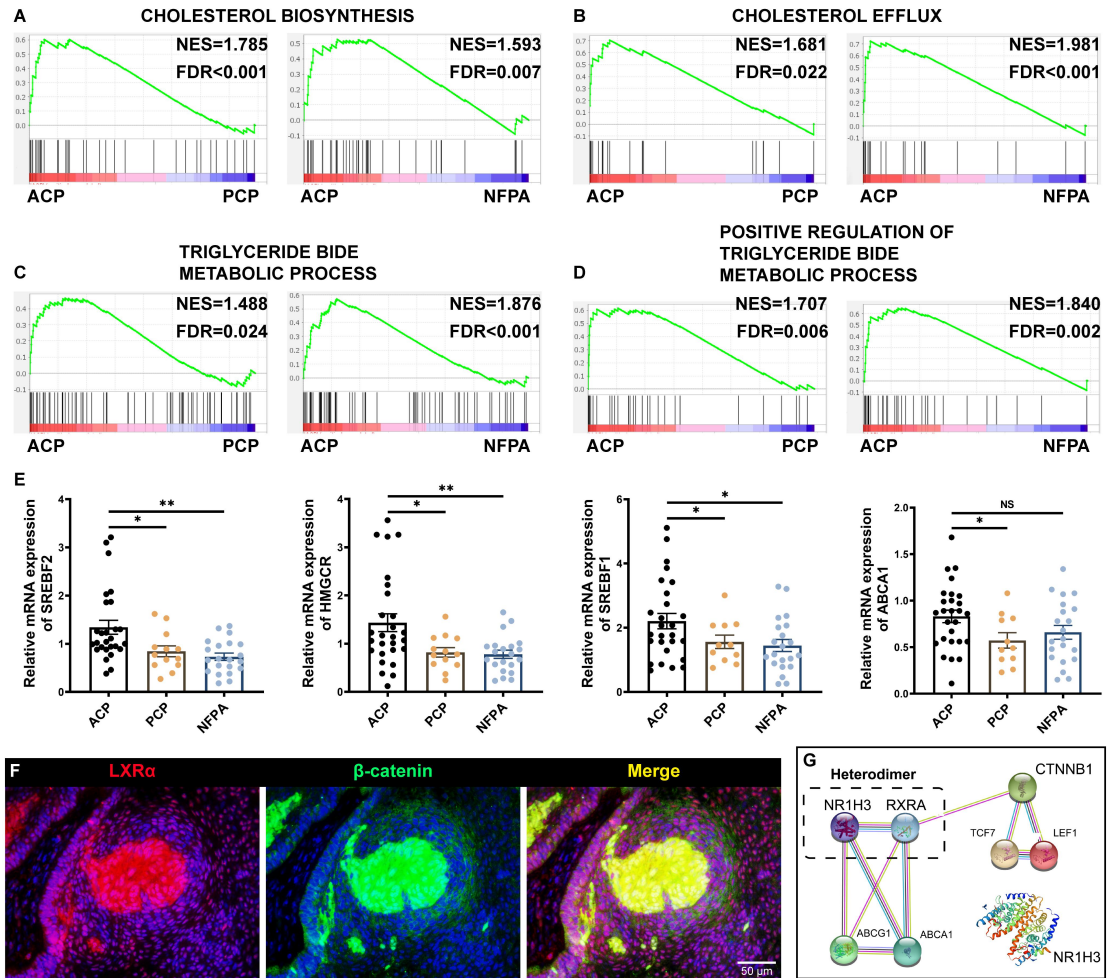

**Supplementary Figure 10. ACP is in an aberrant metabolic state of high synthesis and high efflux of cholesterol.** (A–D) Gene set enrichment analysis (GSEA) shows that, compared with PCP and nonfunctional pituitary adenoma (NFPA), the pathways related to cholesterol biosynthesis (A), cholesterol efflux (B), and triglyceride metabolic process (C and D) were significantly enriched in ACP. False discovery rate (FDR) < 25 % and  $p < 0.05$  were considered significant. (E) qRT-PCR analysis was performed to examine the mRNA expression of cholesterol biosynthesis-related genes sterol regulatory element binding transcription factor 2 (*SREBF2*), 3-hydroxy-3-methylglutaryl coenzyme A reductase (*HMGCR*), sterol regulatory element binding transcription factor 1 (*SREBF1*), and cholesterol efflux-related gene ATP binding cassette subfamily A member 1 (*ABCA1*) in ACP (n = 27), PCP (n = 13) and NFPA (n = 21) samples. (F) Representative dual immunofluorescence images of LXR $\alpha$  and  $\beta$ -catenin in ACP tissue samples. (G) Protein interaction network analysis shows strong interaction between *CTNNB1* and complex of *NR1H3* and *RXRA*. Data are presented as the mean  $\pm$  SEM. \* $p < 0.05$ , \*\* $p < 0.01$ , \*\*\* $p < 0.001$ , \*\*\*\* $p < 0.0001$ , NS: not significant. Statistical analysis: (E) two-tailed Student's unpaired t-test. NES, normalized enrichment score.



## Protect against lipid-induced htNSC senescence in ACP

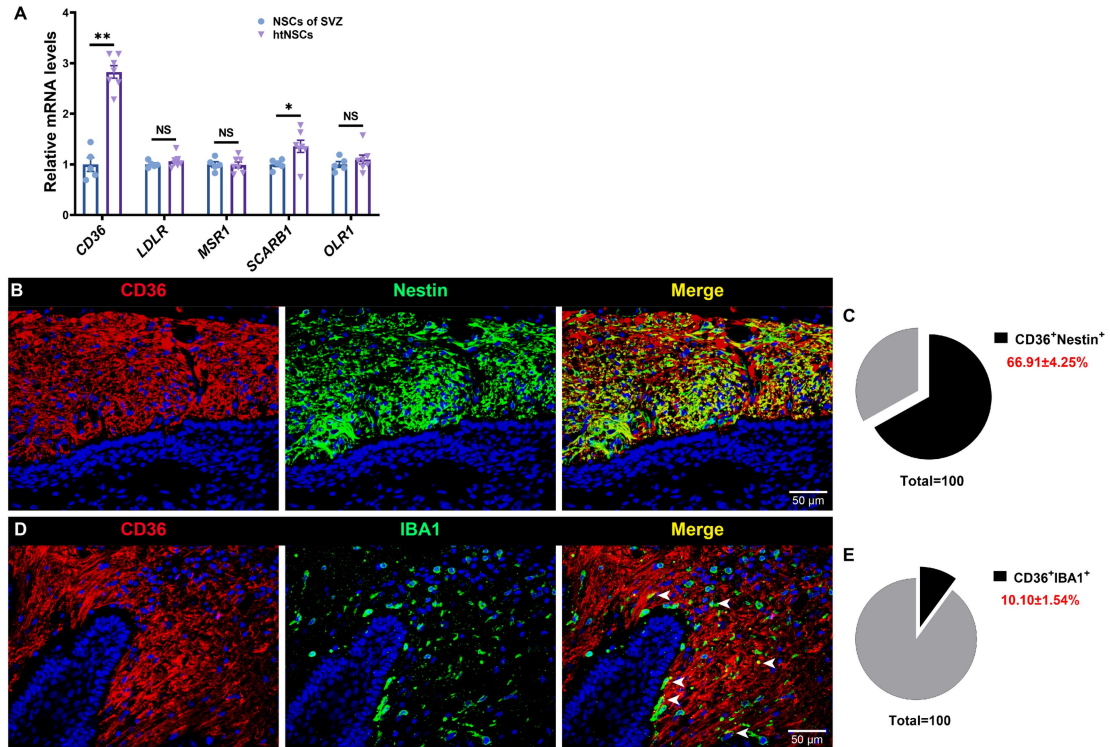

**Supplementary Figure 11. Recruited htNSCs express high levels of scavenger receptor CD36.** (A) qRT-PCR analysis of *CD36*, *LDLR*, *MSR1*, *SCARB1*, and *OLR1* expression in CD133<sup>+</sup> NSCs from the 3VF adjacent to ACP (n = 7) and SVZ of normal brain (NB; n = 5). (B) Immunofluorescence staining of ACP tissue samples, representative images of Nestin and CD36 staining. (D) Double immunofluorescence staining of ACP tissue samples, representative images of IBA-1 and CD36 staining. (C and E) Quantification of double staining for CD36 with Nestin (C, n = 11) and IBA-1 (E, n = 11). Data are presented as the mean  $\pm$  SEM. \* $p < 0.05$ , \*\* $p < 0.01$ , \*\*\* $p < 0.001$ , NS: not significant. Statistical analysis: (A) two-tailed Student's unpaired t-test.

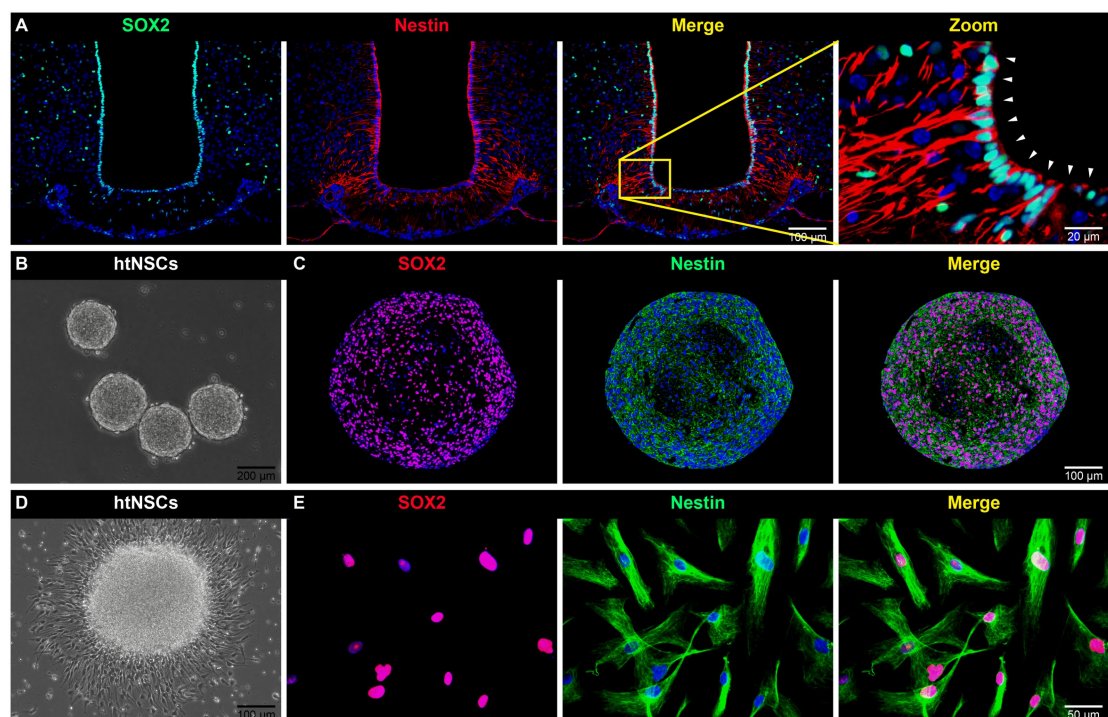

**Supplementary Figure 12. Characterization of mouse htNSCs.** (A) Double immunofluorescence staining of mouse median eminence (ME), representative image of SOX2 and Nestin staining. White arrows indicate the ependymal layer of 3VF. Boxed area is enlarged and presented on the right. (B) Representative reflection microscopy image of neurospheres generated from mouse htNSCs. (C) Double immunofluorescence staining of neurospheres generated from mouse htNSCs, representative images of SOX2 and Nestin staining. (D) Representative reflection microscopy image of adherent mouse htNSCs. (E) Double immunofluorescence staining of adherent mouse htNSCs, representative images of SOX2 and Nestin staining.

# Protect against lipid-induced htNSC senescence in ACP

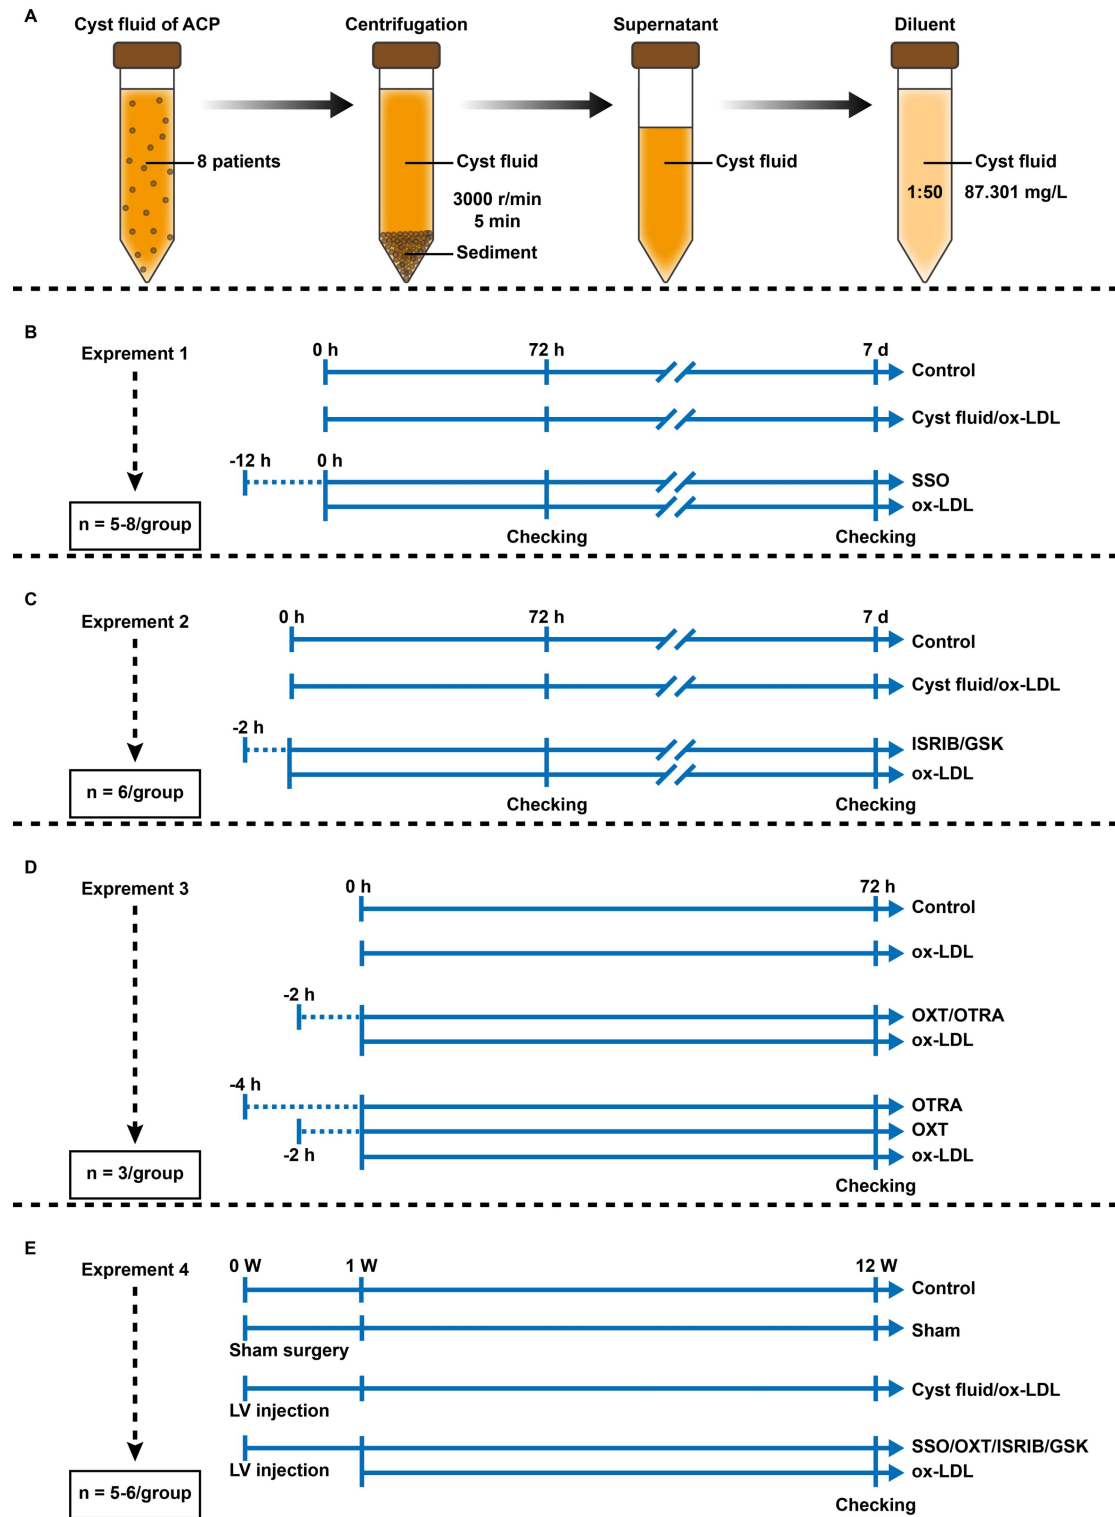

**Supplementary Figure 13. Schematic diagrams of the cystic fluid purification, experimental design, and experimental timelines.** (A) Schematic diagram of cystic fluid purification. (B–D) Experimental outlines of the *in vitro* experiments described in the article. (E) Experimental outlines of the *in vivo* experiments described in the article. (B) Related to Supplementary Figure 14–17; (C) related to Supplementary Figure 19F–19K, Supplementary Figure 20 and 21; (D) related to Supplementary Figure 22C and 22D; (E) related to Supplementary Figure 22E–22K, Supplementary Figure 24 and 25.

# Protect against lipid-induced htNSC senescence in ACP

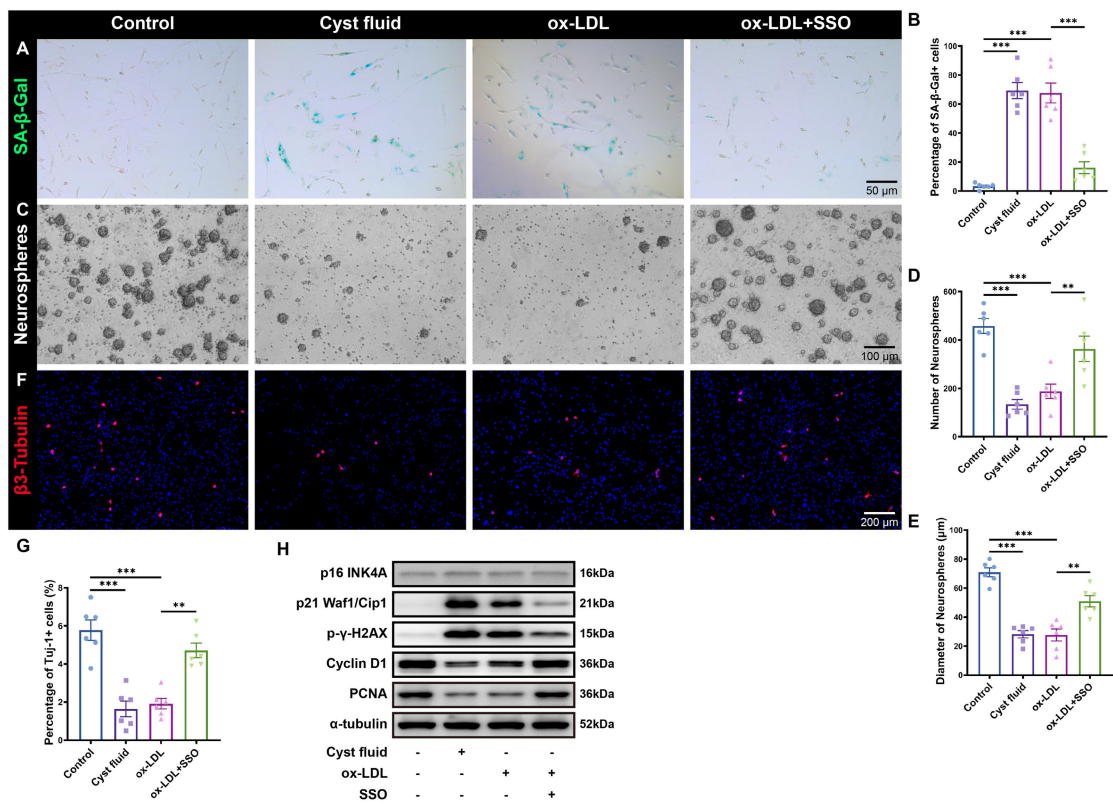

**Supplementary Figure 14. SSO inhibits the senescence induced by ox-LDL in mouse htNSCs.** (A) SA- $\beta$ -gal staining of mouse htNSCs treated with cystic fluid or ox-LDL  $\pm$  SSO; representative images, senescent cells are positive for SA- $\beta$ -gal. (B) Quantification of senescent (SA- $\beta$ -gal<sup>+</sup>) cells shown in (A), data are presented as the percentage of SA- $\beta$ -gal<sup>+</sup> cells, n = 6/group. (C) Neurospheres generated from mouse htNSCs treated with cystic fluid or ox-LDL  $\pm$  SSO, representative reflection microscopy images are shown. (D and E) Quantification of neurospheres generated from mouse htNSCs described in (C); (D) number, and (E) diameter, n = 6/group. (F) Immunostaining of neurospheric cells for neuronal marker  $\beta$ 3-Tubulin. Neurospheres were generated from the hypothalamus of young mice as described in the Methods section. Dissociated neurospheric cells (passages 5-10) were treated with cystic fluid or ox-LDL  $\pm$  SSO and then differentiated for seven days. (G) Quantification of  $\beta$ 3-Tubulin<sup>+</sup> cells described in (F); data are presented as the percentage of  $\beta$ 3-Tubulin<sup>+</sup> cells, n = 6/group. (H) Protein expression of p16 INK4A, p21 Waf1/Cip1, p- $\gamma$ -H2AX, Cyclin D1, and PCNA in htNSCs treated with cystic fluid or ox-LDL  $\pm$  SSO was examined by Western blotting; a representative blot is shown (n = 3 blots in total). Data are presented as the mean  $\pm$  SEM. \* $p$  < 0.05, \*\* $p$  < 0.01, \*\*\* $p$  < 0.001, NS: not significant. Statistical analysis: (B, D, E, and G) one-way ANOVA followed by Fisher's LSD *post hoc* multiple comparison test.



## Protect against lipid-induced htNSC senescence in ACP

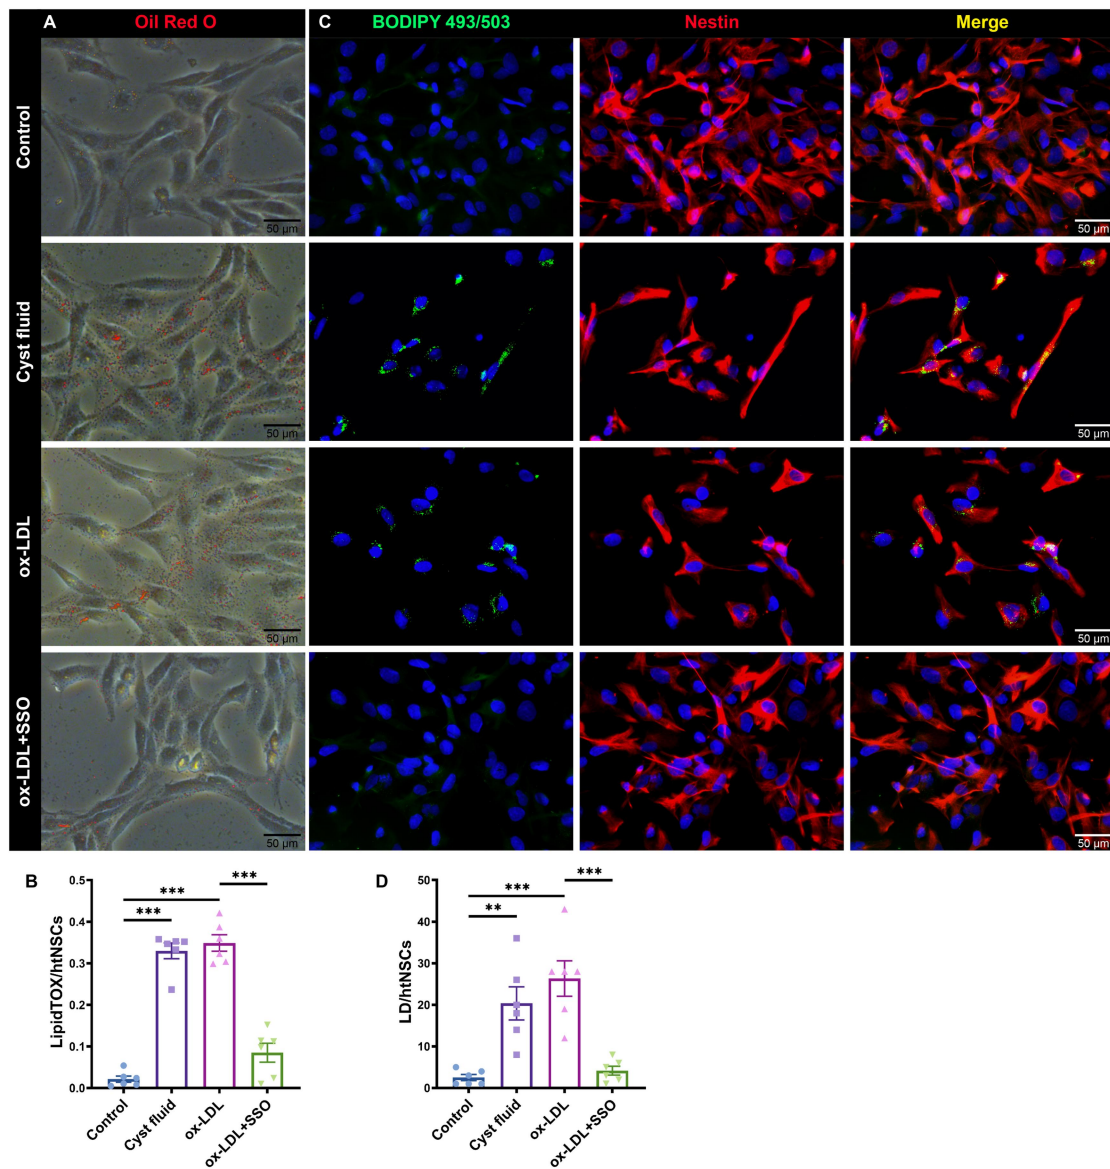

**Supplementary Figure 15. LD aggregation induced by ox-LDL is inhibited by SSO in the cultured htNSCs. (A–D) Characterization of lipid deposition in mouse htNSCs treated with cystic fluid or ox-LDL ± SSO (n = 6/group); representative images and quantification of ORO staining (A, B), and immunofluorescence staining of Nestin and BODIPY 493/503 (C, D). Data are presented as the mean ± SEM. \* $p < 0.05$ , \*\* $p < 0.01$ , \*\*\* $p < 0.001$ , NS: not significant. Statistical analysis: (B and D) one-way ANOVA followed by Fisher’s LSD *post hoc* multiple comparison test.**

## Protect against lipid-induced htNSC senescence in ACP

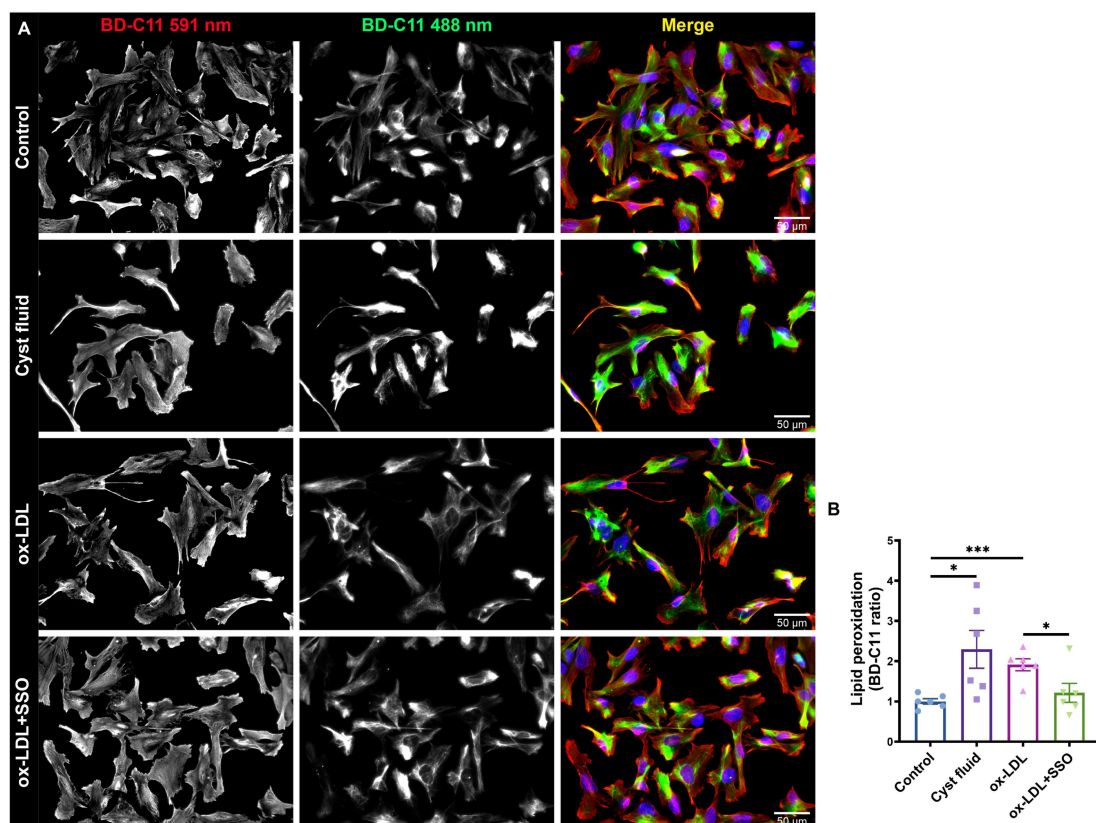

**Supplementary Figure 16. SSO inhibits the lipid peroxidation induced by ox-LDL in the mouse htNSCs.** (A) Mouse htNSCs were treated with cystic fluid or ox-LDL  $\pm$  SSO and then labeled with BD-C11. Representative images show total (red, 591 nm) and peroxidated (green, 488 nm) lipids. (B) Quantification of peroxidated lipid ratio (green to red) for each group,  $n = 6/\text{group}$ . Data are presented as the mean  $\pm$  SEM. \* $p < 0.05$ , \*\* $p < 0.01$ , \*\*\* $p < 0.001$ , NS: not significant. Statistical analysis: (B) one-way ANOVA followed by Fisher's LSD *post hoc* multiple comparison test.



Protect against lipid-induced htNSC senescence in ACP

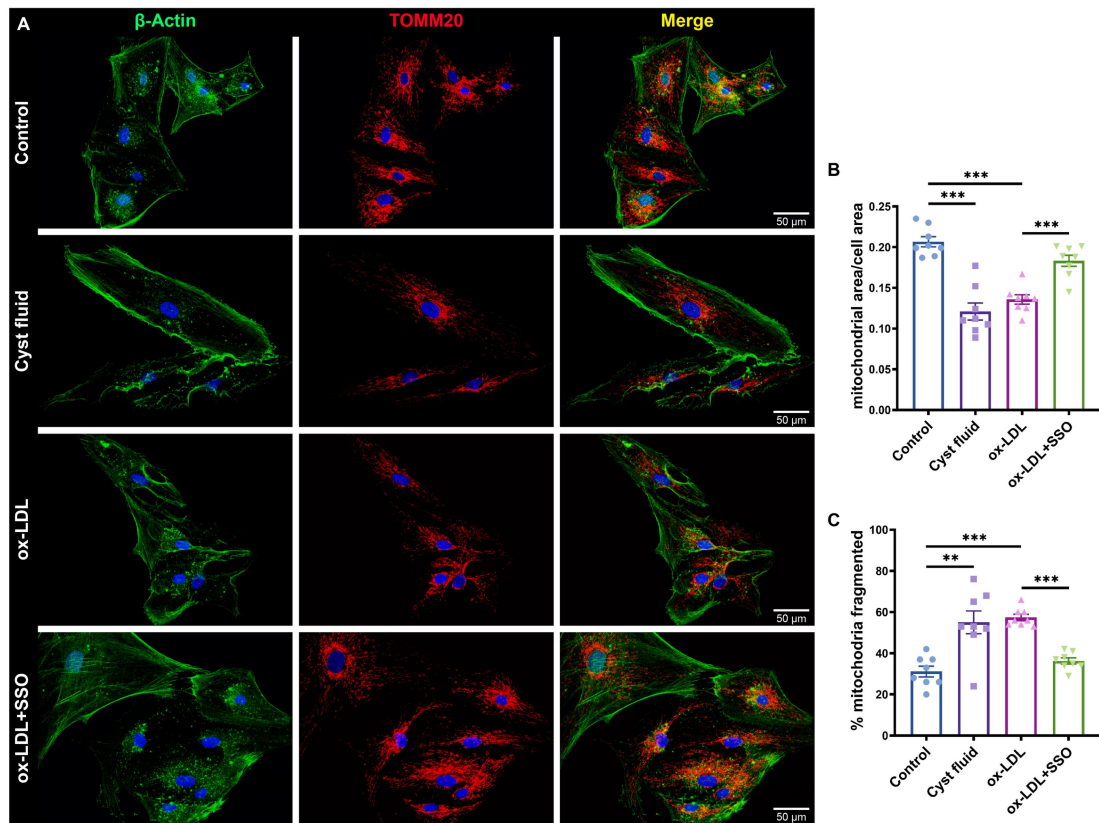

**Supplementary Figure 17. SSO inhibits mitochondrial damage induced by ox-LDL in the mouse htNSCs.** (A) Mitochondrial damage in mouse htNSCs treated with cystic fluid or ox-LDL  $\pm$  SSO was assessed by immunofluorescence staining;  $\beta$ -actin, TOMM20; representative images are shown. (B and C) Quantification of images presented in (A); (B) mitochondrial area (%), and (C) mitochondrial fragments (%),  $n = 8/\text{group}$ . Data are presented as the mean  $\pm$  SEM. \* $p < 0.05$ , \*\* $p < 0.01$ , \*\*\* $p < 0.001$ , NS: not significant. Statistical analysis: (B and C) one-way ANOVA followed by Fisher's LSD *post hoc* multiple comparison test.



**Supplementary Figure 18. Characterization of senescence characteristics in htNSCs acquired from the 3VF adjacent to ACP, removing the interference of  $\beta$ -catenin-accumulating clusters.** (A–C) The hypothalamic tissue (A) adjacent to ACP were isolated under stereo microscopy (B) from fresh surgical ACP specimens obtained intraoperation, which were verified by H&E staining (C). (D) GSEA indicating strong enrichment for the BMP signaling pathway in htNSCs; however, FGF signaling pathway, SHH signaling pathway and WNT signaling pathway were not enriched in htNSCs. (E) GSEA indicating strong enrichment for the senescence-associated secretory phenotype (SASP) in htNSCs. (F) Relative mRNA expression levels of SASP target genes in htNSCs and NSCs of SVZ (htNSCs, n = 5; NSCs of SVZ, n = 3). (G) SA- $\beta$ -gal staining of htNSCs and NSCs of SVZ; representative images are shown, senescent cells are positive for SA- $\beta$ -gal. (H) Quantification of senescent (SA- $\beta$ -gal<sup>+</sup>) cells shown in (G), data are presented as the percentage of SA- $\beta$ -gal<sup>+</sup> cells, n = 6/group. (I) Immunofluorescence staining of htNSCs and NSCs of SVZ, representative images of Lamin B1 staining. (J) Quantification of Lamin B1 fluorescence intensity in htNSCs and NSCs of SVZ described in (I) (n = 6/group). (K) Immunofluorescence staining of htNSCs and NSCs of SVZ, representative images of H3K9Me3 staining. (L) Quantification of H3K9Me3 fluorescence intensity in htNSCs and NSCs of SVZ described in (K) (n = 6/group). Data are presented as the mean  $\pm$  SEM. \* $p$  < 0.05, \*\* $p$  < 0.01, \*\*\* $p$  < 0.001, NS: not significant. Statistical analysis: (F, H, J, and L) two-tailed Student's unpaired t-test.

# Protect against lipid-induced htNSC senescence in ACP

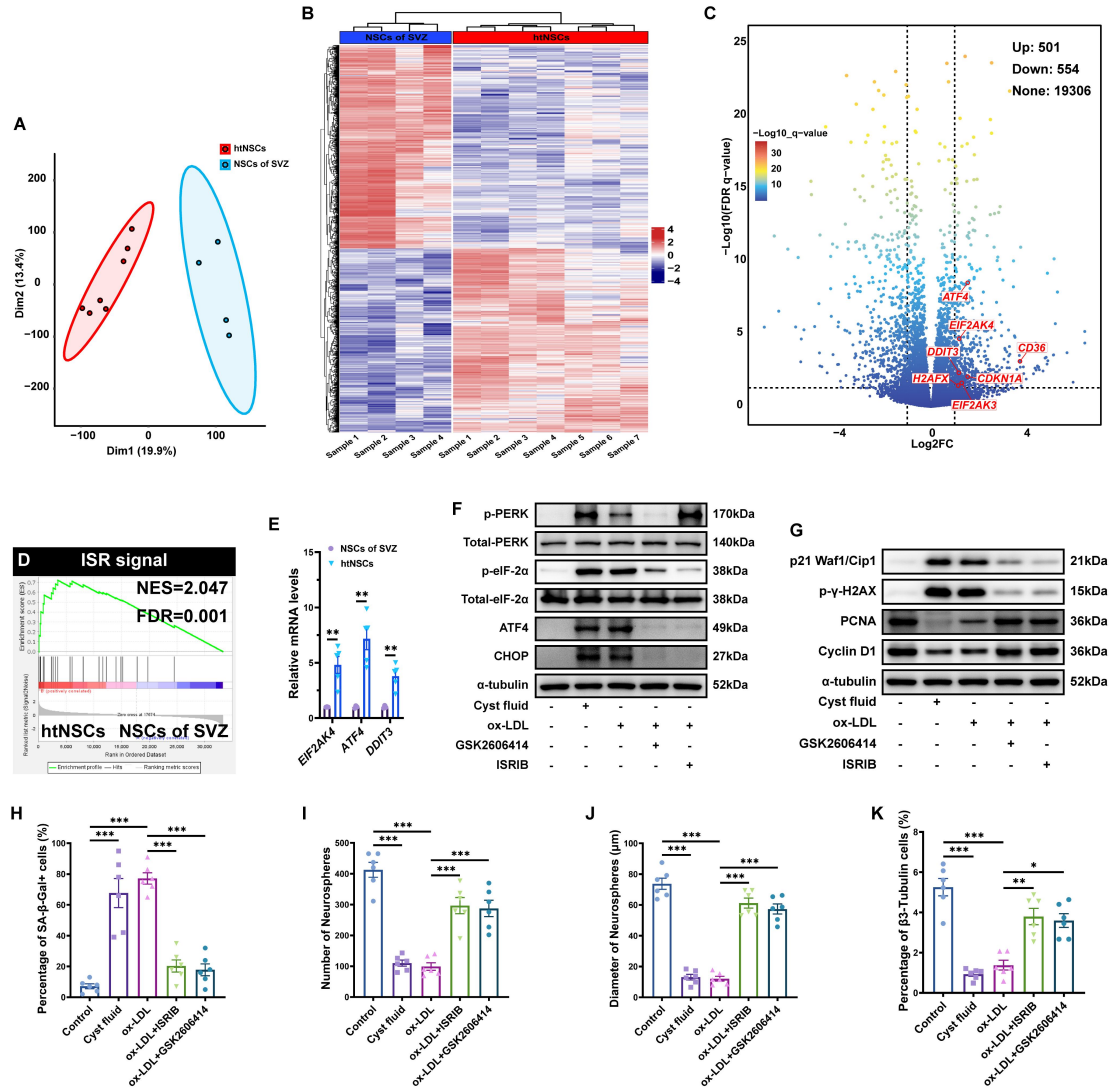

**Supplementary Figure 19. Integrated stress response (ISR) signaling pathway is activated in lipotoxic htNSCs.** (A) Principal component analysis (PCA) of NSCs from the 3VF adjacent to ACP and the SVZ of NB. (B) Gene expression profiling via RNA-sequencing shows differentially expressed genes (DEGs) between htNSCs and NSCs of SVZ based on hierarchization clustering using the following filter criteria: false discovery rate (FDR) < 0.05 and fold-change > 2. (C) A volcano plot of  $p$ -values as a function of weighted fold change showing the down-regulated and up-regulated DEGs of two groups as indicated. (D) Gene set enrichment analysis (GSEA) indicating strong enrichment for the ISR signaling pathway in htNSCs. (E) Relative mRNA expression levels of ISR signaling target genes in htNSCs and NSCs of SVZ (htNSCs,  $n = 5$ ; NSCs of SVZ,  $n = 3$ ). (F and G) Protein expression of phospho-PERK, total-PERK, phospho-eIF-2 $\alpha$ , total-eIF-2 $\alpha$ , ATF4 and CHOP (F), p21 Waf1/Cip1, p- $\gamma$ -H2AX, Cyclin D1, and PCNA (G) in mouse htNSCs treated with cystic fluid, ox-LDL  $\pm$  ISRIB, or ox-LDL  $\pm$  GSK2606414 were evaluated using Western blotting. Representative blot is shown ( $n = 3$  blots in total). (H) Quantification of senescent (SA- $\beta$ -gal<sup>+</sup>) cells in mouse htNSCs treated with cystic fluid, ox-LDL  $\pm$  ISRIB, or ox-LDL  $\pm$  GSK2606414. Data are presented as the percentage of SA- $\beta$ -gal<sup>+</sup> cells ( $n = 6$ /group). (I and J) Quantification of neurospheres generated from mouse htNSCs treated with cystic fluid, ox-LDL  $\pm$  ISRIB, or ox-LDL  $\pm$  GSK2606414; (I) number, (J) diameter ( $n = 6$ /group). (K) Quantification of  $\beta$ 3-Tubulin<sup>+</sup> cells in mouse htNSCs treated with cystic fluid, ox-LDL  $\pm$  ISRIB, or ox-LDL  $\pm$  GSK2606414. Data are presented as the percentage of  $\beta$ 3-Tubulin<sup>+</sup> cells ( $n = 6$ /group). Data are presented as the mean  $\pm$  SEM. \* $p < 0.05$ , \*\* $p < 0.01$ , \*\*\* $p < 0.001$ , NS: not significant. Statistical analysis: (E) two-tailed Student's unpaired t-test and (H–K) one-way ANOVA followed by Fisher's LSD *post hoc* multiple comparison test. NES, normalized enrichment score.

## Protect against lipid-induced htNSC senescence in ACP

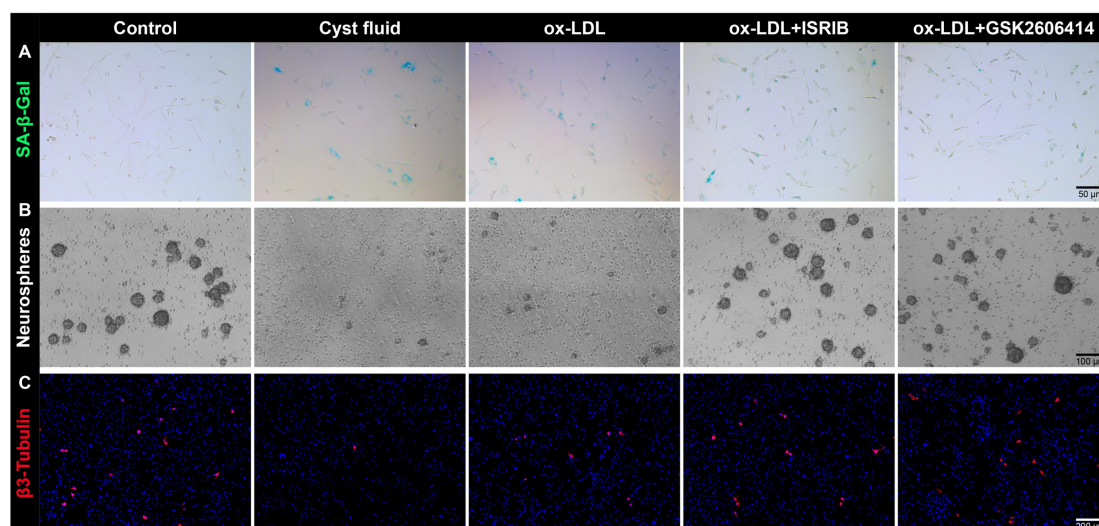

**Supplementary Figure 20. The ISR inhibitors block the senescence of mouse htNSCs induced by ox-LDL. (A)** SA-β-gal staining of mouse htNSCs treated with cystic fluid, ox-LDL ± ISRIB, or ox-LDL ± GSK2606414. Representative images showing senescent (SA-β-gal<sup>+</sup>) cells. **(B)** Reflection microscopy of neurospheres generated from mouse htNSCs treated with cystic fluid, ox-LDL ± ISRIB, or ox-LDL ± GSK2606414. Representative images are shown. **(C)** Neurospheric cells (passages 5-10) treated with cystic fluid, ox-LDL ± ISRIB, or ox-LDL ± GSK2606414 were differentiated for seven days, fixed, and then immunostained for neuronal marker β3-Tubulin. Representative images are shown.



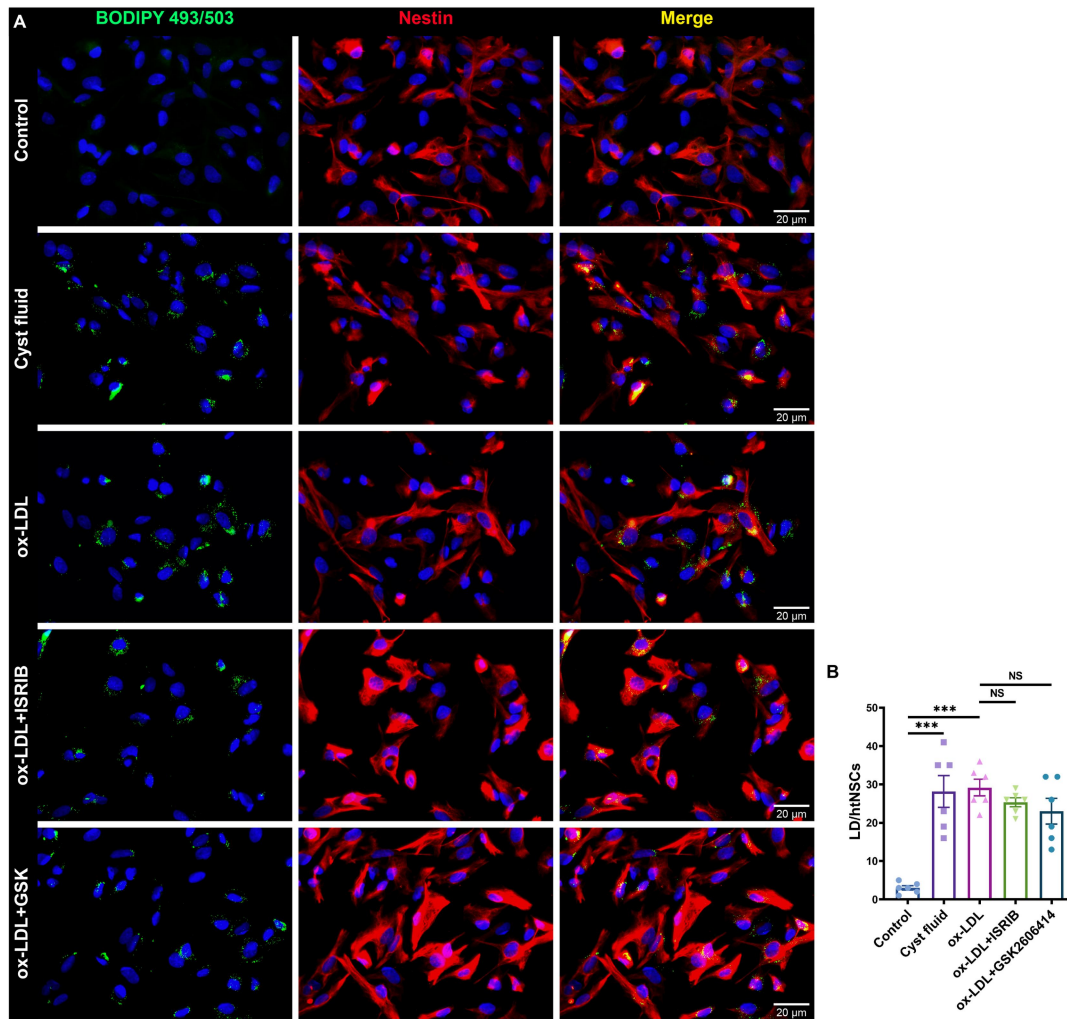

**Supplementary Figure 21. The ISR inhibitors cannot block the accumulation of LDs in htNSCs induced by ox-LDL.** (A and B) Mouse htNSCs treated with cystic fluid, ox-LDL ± ISRIB, or ox-LDL ± GSK2606414 and lipid deposition was evaluated by immunofluorescence staining for Nestin and BODIPY 493/503. Representative images (A) and quantification (B) are shown (n = 6/group). Data are presented as the mean ± SEM. \* $p < 0.05$ , \*\* $p < 0.01$ , \*\*\* $p < 0.001$ , NS: not significant. Statistical analysis: (B) one-way ANOVA followed by Fisher's LSD *post hoc* multiple comparison test.

# Protect against lipid-induced htNSC senescence in ACP

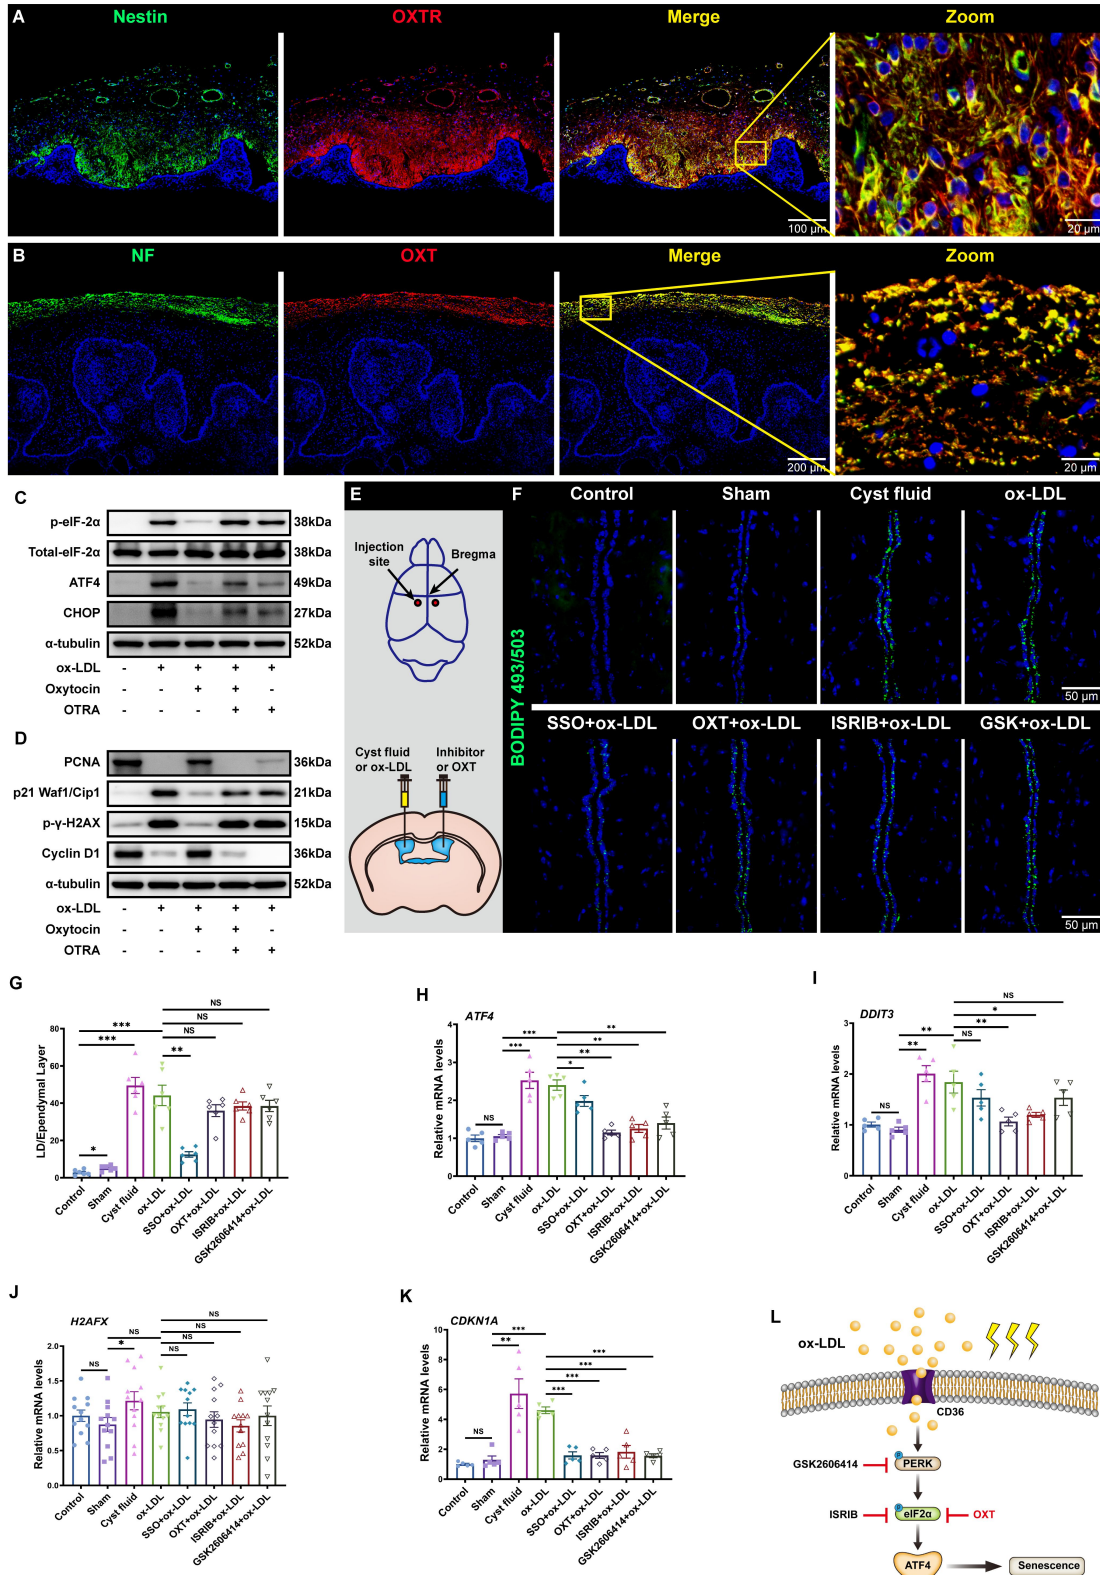



**Supplementary Figure 22. Oxytocin (OXT) blocks ox-LDL induced senescence of htNSCs by inhibiting ISR signaling.** (A and B) Immunofluorescence staining of different ACP tissue samples, representative images of Nestin and OXTR (A), NF and OXT (B) staining. Boxed area is enlarged and presented on the right. (C and D) Protein expression of phospho-eIF-2 $\alpha$ , total-eIF-2 $\alpha$ , ATF4 and CHOP (C), p21 Waf1/Cip1, p- $\gamma$ -H2AX, Cyclin D1, and PCNA (D) in mouse htNSCs treated with ox-LDL  $\pm$  OXT, ox-LDL + OXT + OTRA, or ox-LDL  $\pm$  OTRA were evaluated by Western blotting. A representative blot is shown (n = 3 blots in total). (E) Schematic diagram showing the stereotaxic coordinates of LV localization injection. (F and G) Lipid deposition in the ependymal layer of 3V wall of mice treated with cystic fluid, ox-LDL  $\pm$  SSO, ox-LDL  $\pm$  OXT, ox-LDL  $\pm$  ISRIB, or ox-LDL  $\pm$  GSK2606414 (GSK) was evaluated by immunofluorescence staining using BODIPY 493/503 (green). Representative images (F) and quantification (G) are shown (n = 6/group). (H–K) Relative mRNA expression levels of *ATF4* (H), *DDIT3* (I), *H2AFX* (J), and *CDKN1A* (K) in the arcuate nucleus (ARC) and median eminence (ME) tissues of mouse treated with cystic fluid, ox-LDL  $\pm$  SSO, ox-LDL  $\pm$  OXT, ox-LDL  $\pm$  ISRIB, or ox-LDL  $\pm$  GSK2606414 (H, I, and K, n = 5/group; J, n = 12/group). (L) Schematic diagram showing the targets of ISRIB, GSK2606414, and OXT in ISR signaling. Data are presented as the mean  $\pm$  SEM. \* $p$  < 0.05, \*\* $p$  < 0.01, \*\*\* $p$  < 0.001, NS: not significant. Statistical analysis: (G–K) one-way ANOVA followed by Fisher's LSD *post hoc* multiple comparison test.

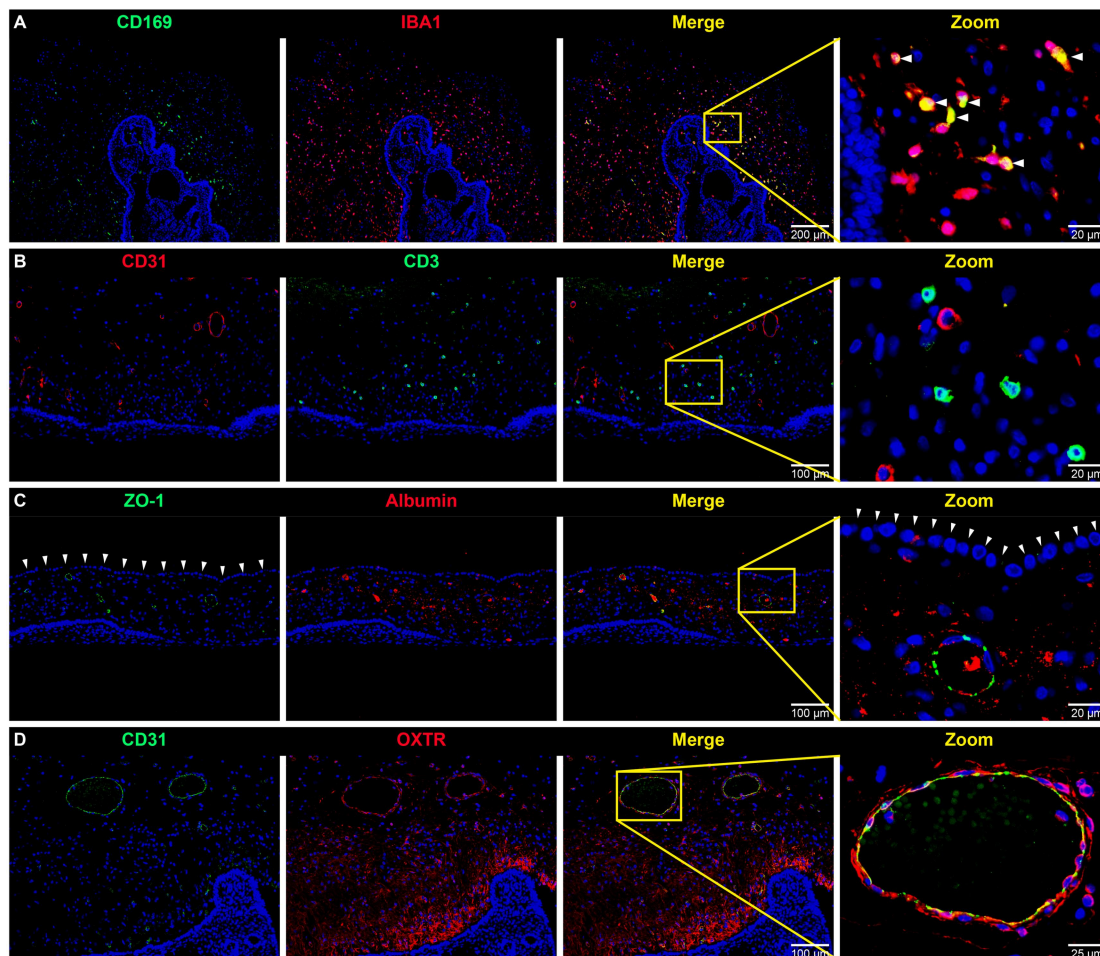

**Supplementary Figure 23. Blood–brain barrier (BBB) is damaged in the 3VF adjacent to ACP.** (A) Double immunofluorescence staining of ACP tissue samples. Representative images of CD169 and IBA1 staining. The white arrows indicate the IBA-1<sup>+</sup>CD169<sup>+</sup> cells. Boxed area is enlarged and presented on the right. (B) Immunofluorescence staining of ACP tissue samples. Representative images of CD31 and CD3 staining. Boxed area is enlarged and presented on the right. (C) Double immunofluorescence staining of ACP tissue samples. Representative images of ZO-1 and Albumin staining. The white arrows indicate the ependymal layer of 3VF. Boxed area is enlarged and presented on the right. (D) Double immunofluorescence staining of ACP tissue samples. Representative images of CD31 and OXTR staining. Boxed area is enlarged and presented on the right.

# Protect against lipid-induced htNSC senescence in ACP

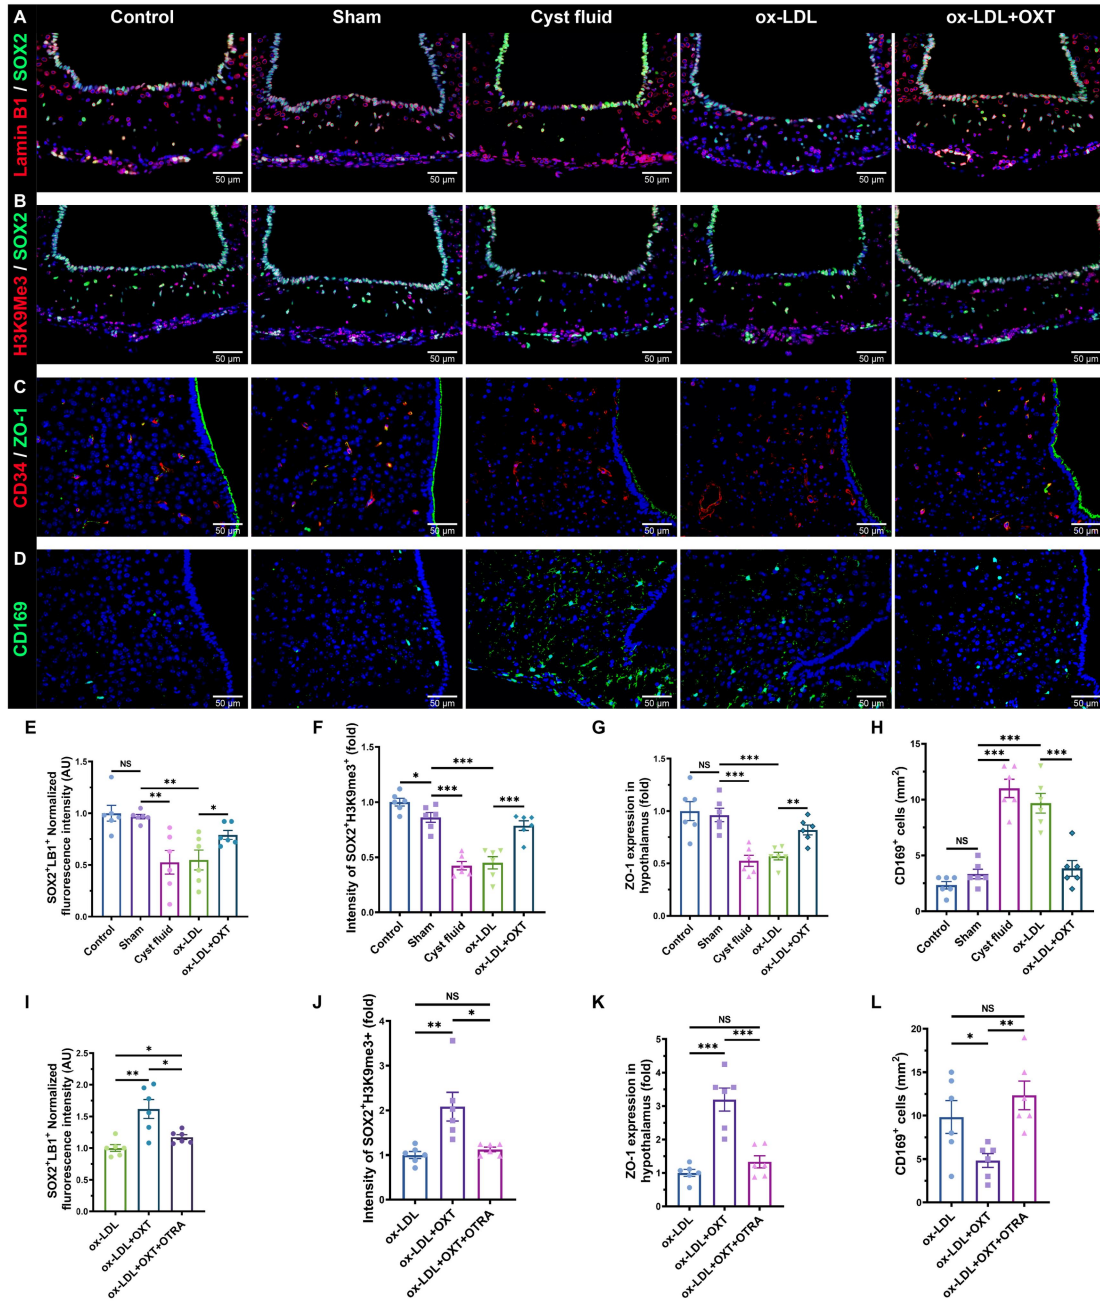

**Supplementary Figure 24. OXT blocks the ox-LDL-induced senescence of NSCs in the ME of mice.** (A) Double immunofluorescence staining of the ME of mouse treated with cystic fluid or ox-LDL ± OXT. Representative images of Lamin B1 and SOX2 staining. (B) Double immunofluorescence staining of the ME of mouse treated with cystic fluid or ox-LDL ± OXT. Representative images of H3K9Me3 and SOX2 staining. (C) Double immunofluorescence staining of the ME of mouse treated with cystic fluid or ox-LDL ± OXT. Representative images of CD34 and ZO-1 staining. (D) Immunofluorescence staining of the ME of mouse treated with cystic fluid or ox-LDL ± OXT. Representative images of CD169 staining. (E) Quantification of Lamin B1 fluorescence intensity in SOX2<sup>+</sup> NSCs described in (A) (n = 6/group). (F) Quantification of H3K9Me3 fluorescence intensity in SOX2<sup>+</sup> NSCs described in (B) (n = 6/group). (G) Quantification of ZO-1 expression described in (C) (n = 6/group). (H) Quantification of CD169<sup>+</sup> cells described in (D) (n = 6/group). (I and J) Quantification of Lamin B1 (I) and H3K9Me3 (J) fluorescence intensity in the SOX2<sup>+</sup> NSCs of ME of mouse treated with ox-LDL ± OXT or ox-LDL + OXT + OTRA (n = 6/group). (K) Quantification of ZO-1 expression in the ME of mouse treated with ox-LDL ± OXT or ox-LDL + OXT + OTRA (n = 6/group). (L) Quantification of CD169<sup>+</sup> cells in the ME of mouse treated with ox-LDL ± OXT or ox-LDL + OXT + OTRA (n = 6/group). Data are presented as the mean ± SEM. \**p* < 0.05, \*\**p* < 0.01, \*\*\**p* < 0.001, NS: not significant. Statistical analysis: (E–L) one-way ANOVA followed by Fisher's LSD *post hoc* multiple comparison test.

# Protect against lipid-induced htNSC senescence in ACP

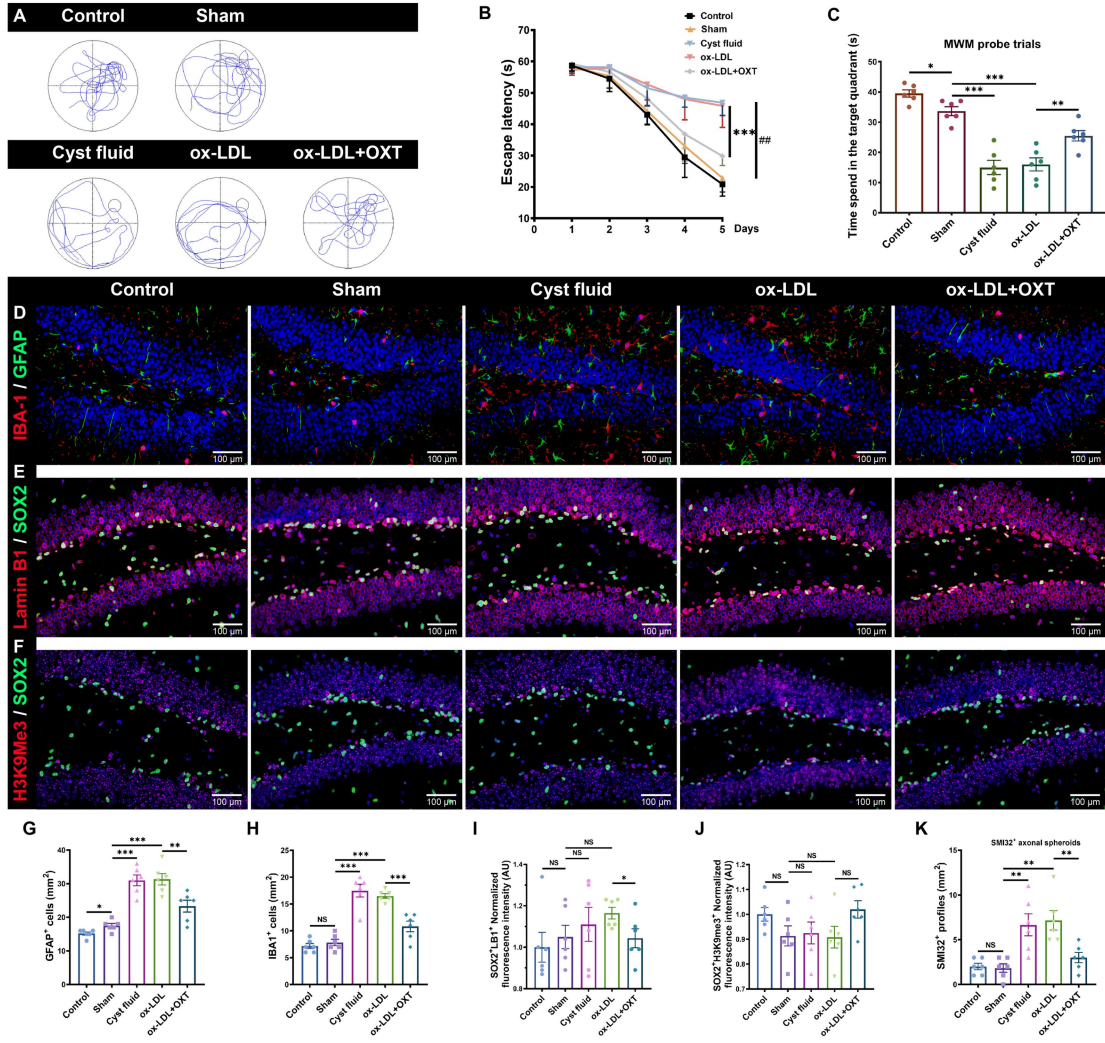

**Supplementary Figure 25. OXT blocks the ox-LDL-induced cognitive function descending of mouse models.**

**(A)** Representative swimming traces of mice treated with cystic fluid or ox-LDL ± OXT during the test phase. Small circles show the position of former escape platforms that were removed during the test phase. **(B)** Average latencies to find the escape platform during the training phase for the mice treated with cystic fluid or ox-LDL ± OXT (n = 6/group). **(C)** Average time spent in the target quadrant for the mice treated with cystic fluid or ox-LDL ± OXT during the test phase (n=6/group). **(D)** Double immunofluorescence staining of the hippocampus of mouse treated with cystic fluid or ox-LDL ± OXT. Representative images of IBA-1 and GFAP staining. **(E)** Double immunofluorescence staining of the hippocampus of mouse treated with cystic fluid or ox-LDL ± OXT. Representative images of Lamin B1 and SOX2 staining. **(F)** Double immunofluorescence staining of the hippocampus of mouse treated with cystic fluid or ox-LDL ± OXT. Representative images of H3K9Me3 and SOX2 staining. **(G)** Quantification of the GFAP<sup>+</sup> astrocytes described in (D) (n = 6/group). **(H)** Quantification of the IBA-1<sup>+</sup> microglia described in (D) (n = 6/group). **(I)** Quantification of Lamin B1 fluorescence intensity in SOX2<sup>+</sup> NSCs described in (E) (n = 6/group). **(J)** Quantification of H3K9Me3 fluorescence intensity in SOX2<sup>+</sup> NSCs described in (F) (n = 6/group). **(K)** Quantification of the SMI-32<sup>+</sup> axonal spheroids in the ME of mice treated with cystic fluid or ox-LDL ± OXT (n = 6/group). Data are presented as the mean ± SEM. \**p* < 0.05, \*\**p* < 0.01, ##*p* < 0.01, \*\*\**p* < 0.001, NS: not significant. Statistical analysis: (B, C, G–K) one-way ANOVA followed by Fisher's LSD *post hoc* multiple comparison test.



Protect against lipid-induced htNSC senescence in ACP

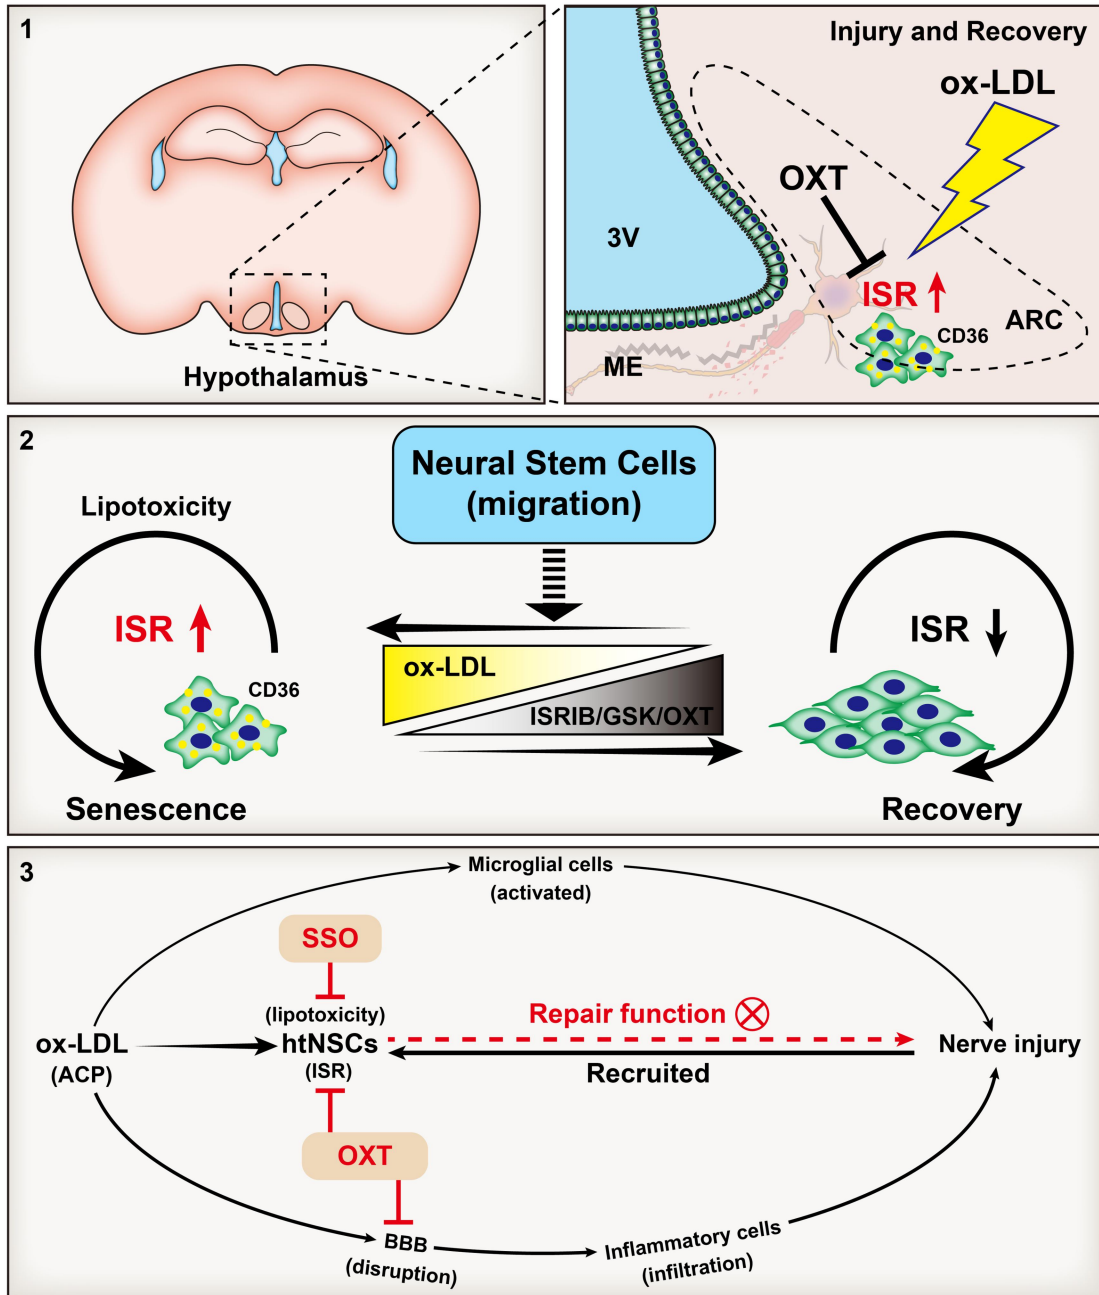



**Graphical Abstract. Molecular mechanism by which OXT avoids the senescence of htNSCs induced by ox-LDL.** On the one hand, the lipids from ACP resulting in not only the nerve damage by activating microglia, and BBB breakage in the hypothalamus including 3VF, but also the lipotoxicity, senescence and dysfunction of the recruited htNSCs by activating the ISR signaling. On the other hand, both SSO and OXT can prevent the senescence of htNSCs, among which, SSO prevents the senescence of htNSCs by restraining ox-LDL from entering the htNSCs, while OXT by targeting the ISR signaling thus blocking the htNSC senescence induced by ox-LDL. Except that, OXT can also repair the BBB and then decrease the inflammatory cells infiltration thereby improving the inflammatory microenvironment.

Protect against lipid-induced htNSC senescence in ACP

**Supplementary Table 1.** List of the antibodies used for immunofluorescence and immunohistochemical stainings.

| <b>Antibody</b>                                   | <b>Dilution</b> | <b>Source</b>             | <b>Identifier</b>                 |
|---------------------------------------------------|-----------------|---------------------------|-----------------------------------|
| Rabbit monoclonal anti-pan Cytokeratin (Pan-CK)   | 1:500           | Abcam                     | Cat# ab234297; RRID: AB_2895302   |
| Rabbit monoclonal anti-MAP2                       | 1:400           | Abcam                     | Cat# ab183830; RRID: AB_2895301   |
| Rabbit monoclonal anti-NeuN                       | 1:300           | Abcam                     | Cat# ab177487; RRID: AB_2532109   |
| Rabbit monoclonal anti-Myelin Basic Protein (MBP) | 1:200           | Abcam                     | Cat# ab218011; RRID: AB_2895537   |
| Rabbit monoclonal anti-SOX2                       | 1:300           | Abcam                     | Cat# ab92494; RRID: AB_10585428   |
| Rabbit monoclonal anti-Nestin                     | 1:500           | Abcam                     | Cat# ab176571; RRID: AB_2895536   |
| Rabbit monoclonal anti- $\beta$ 3-Tubulin         | 1:250           | Cell Signaling Technology | Cat# 5568; RRID: AB_10694505      |
| Rabbit polyclonal anti-p- $\gamma$ -H2AX          | 1:500           | Abcam                     | Cat# ab2893; RRID: AB_303388      |
| Rabbit monoclonal anti-p21 Waf1/Cip1              | 1:500           | Abcam                     | Cat# ab188224; RRID: AB_2734729   |
| Rabbit polyclonal anti-Ki-67                      | 1:2000          | Abcam                     | Cat# ab15580; RRID: AB_443209     |
| Rabbit monoclonal anti- $\beta$ -catenin          | 1:200           | Abcam                     | Cat# ab32572; RRID: AB_725966     |
| Rabbit monoclonal anti-CD36                       | 1:300           | Abcam                     | Cat# ab133625; RRID: AB_2716564   |
| Rabbit monoclonal anti-TOMM20                     | 1:400           | Cell Signaling Technology | Cat# 42406; RRID: AB_2687663      |
| Rabbit monoclonal anti-Oxytocin Receptor (OXTR)   | 1:200           | Abcam                     | Cat# ab181077; RRID: AB_2895535   |
| Rabbit monoclonal anti-Oxytocin (OXT)             | 1:1000          | Abcam                     | Cat# ab212193; RRID: AB_2895534   |
| Rabbit monoclonal anti-IBA1                       | 1:300           | Abcam                     | Cat# ab178847; RRID: AB_2832244   |
| Rabbit polyclonal anti-CD31                       | 1:150           | Thermo Fischer Scientific | Cat# PA5-16301; RRID: AB_10981955 |
| Rabbit monoclonal anti-CD34                       | 1:300           | Abcam                     | Cat# ab81289; RRID: AB_164033     |
| Rabbit polyclonal anti-Albumin                    | 1:150           | Thermo Fischer Scientific | Cat# PA5-89332; RRID: AB_2805499  |
| Rabbit monoclonal anti-POMC                       | 1:200           | Cell Signaling Technology | Cat# 23499; RRID: AB_2716565      |
| Rabbit monoclonal anti-Cleaved caspase-3          | 1:100           | Abcam                     | Cat# ab32042; RRID: AB_725947     |
| Rabbit monoclonal anti-Lamin B1                   | 1:800           | Abcam                     | Cat# ab133741; RRID: AB_2616597   |
| Rabbit monoclonal anti-H3K9Me3                    | 1:600           | Abcam                     | Cat# ab8898; RRID: AB_306848      |

Protect against lipid-induced htNSC senescence in ACP

|                                                |            |                           |                                   |
|------------------------------------------------|------------|---------------------------|-----------------------------------|
| Rabbit monoclonal anti-Rx                      | 1:100      | GeneTex                   | Cat# GTX77859; RRID: AB_424807    |
| Rabbit monoclonal anti-Connexin 43             | 1:300      | Abcam                     | Cat# ab11370; RRID: AB_297976     |
| Rabbit monoclonal anti-SOX9                    | 1:200      | Abcam                     | Cat# ab185230; RRID: AB_2715497   |
| Rabbit monoclonal anti-SOX10                   | 1:200      | Abcam                     | Cat# ab180862; RRID: AB_2721184   |
| Rabbit monoclonal anti-Olig2                   | 1:300      | Abcam                     | Cat# ab109186; RRID: AB_10861310  |
| Rabbit monoclonal anti-LXR $\alpha$            | 1:100      | Abcam                     | Cat# ab41902; RRID: AB_776094     |
| Rabbit monoclonal anti-SMI-32                  | 1:100      | Abcam                     | Cat# ab73273; RRID: AB_1267590    |
| Mouse monoclonal anti-GFAP                     | 1:400      | Sigma-Aldrich             | Cat# SAB5201104; RRID: AB_2827276 |
| Mouse monoclonal anti-NeuN                     | 1:200      | Millipore                 | Cat# MAB377; RRID: AB_2298772     |
| Mouse monoclonal anti-MAP2                     | 1:100      | Santa Cruz                | Cat# sc-74421; RRID: AB_1126215   |
| Mouse monoclonal anti-Neurofilament (NF)       | 1:100      | Abcam                     | Cat# ab134306; RRID: AB_2895532   |
| Mouse monoclonal anti-pan Cytokeratin (pan-CK) | 1:500      | Abcam                     | Cat# ab7753; RRID: AB_306047      |
| Rat monoclonal anti-SOX2                       | 1:200      | Thermo Fischer Scientific | Cat# 14-9811; RRID: AB_11219471   |
| Mouse monoclonal anti-Doublecortin (DCX)       | 1:100      | Santa Cruz                | Cat# sc-271390; RRID: AB_10610966 |
| Mouse monoclonal anti-p16 INK4a                | 1:50/1:200 | Santa Cruz                | Cat# sc-1661; RRID: AB_628067     |
| Mouse monoclonal anti-Nestin                   | 1:100      | Thermo Fischer Scientific | Cat# MA1-110; RRID: AB_2536821    |
| Mouse monoclonal anti-IBA1                     | 1:200      | Sigma-Aldrich             | Cat# SAB2702364; RRID: AB_282025  |
| Mouse monoclonal anti-CD169                    | 1:400      | Thermo Fischer Scientific | Cat# MA5-38471; RRID: AB_2895540  |
| Rat monoclonal anti-CD3                        | 1:100      | Thermo Fischer Scientific | Cat# 14-0032; RRID: AB_467053     |
| Mouse monoclonal anti-ZO-1                     | 1:150      | Thermo Fischer Scientific | Cat# 33-9100; RRID: AB_2533147    |
| Goat polyclonal anti-CD31                      | 1:100      | R&D Systems               | Cat# AF3628; RRID: AB_2161028     |
| Mouse monoclonal anti-Vimentin (VIM)           | 1:800      | Abcam                     | Cat# ab8978; RRID: AB_306907      |
| Mouse monoclonal anti-GPR50                    | 1:100      | R&D Systems               | Cat# MAB4645; RRID: AB_2112821    |
| Mouse monoclonal anti- $\beta$ -Actin          | 1:2000     | Cell Signaling Technology | Cat# 3700; RRID: AB_2242334       |
| Mouse monoclonal anti-Neuropeptide Y (NPY)     | 1:200      | Abcam                     | Cat# ab112473; RRID: AB_10861167  |

Protect against lipid-induced htNSC senescence in ACP

|                                         |       |                |                                   |
|-----------------------------------------|-------|----------------|-----------------------------------|
| Mouse monoclonal anti-MCM2              | 1:400 | BD Biosciences | Cat# 610700; RRID: AB_2141952     |
| Mouse monoclonal anti-EAAT1             | 1:100 | R&D Systems    | Cat# MAB6048; RRID: AB_2044669    |
| Mouse monoclonal anti-MBP               | 1:250 | Abcam          | Cat# ab62631; RRID: AB_956157     |
| Mouse monoclonal anti- $\beta$ -catenin | 1:500 | Abcam          | Cat# ab22656; RRID: AB_447227     |
| Mouse monoclonal anti-GnRH              | 1:500 | Santa Cruz     | Cat# sc-271918; RRID: AB_10610657 |

**Supplementary Table 2.** List of the antibodies used for Western blot.

| Antibody                                   | Dilution | Source                    | Identifier                      |
|--------------------------------------------|----------|---------------------------|---------------------------------|
| Rabbit polyclonal anti-p- $\gamma$ -H2AX   | 1:1000   | Abcam                     | Cat# ab2893; RRID: AB_303388    |
| Rabbit monoclonal anti-p21 Waf1/Cip1       | 1:1000   | Abcam                     | Cat# ab188224; RRID: AB_2734729 |
| Rabbit polyclonal anti-p16 INK4a           | 1:500    | Abcam                     | Cat# ab189034; RRID: AB_2737282 |
| Rabbit monoclonal anti-Cyclin D1           | 1:1000   | Cell Signaling Technology | Cat# 55506; RRID: AB_2827374    |
| Mouse monoclonal anti-PCNA                 | 1:1000   | Abcam                     | Cat# ab29; RRID: AB_303394      |
| Rabbit monoclonal anti- $\alpha$ -Tubulin  | 1:1000   | Cell Signaling Technology | Cat# 2125; RRID: AB_2619646     |
| Rabbit monoclonal anti-p-PERK              | 1:1000   | Cell Signaling Technology | Cat# 3179; RRID: AB_2095853     |
| Rabbit monoclonal anti-total-PERK          | 1:1000   | Cell Signaling Technology | Cat# 3192; RRID: AB_2095847     |
| Rabbit monoclonal anti-p-eIF2 $\alpha$     | 1:1000   | Cell Signaling Technology | Cat# 3398; RRID: AB_2096481     |
| Rabbit monoclonal anti-total-eIF2 $\alpha$ | 1:1000   | Cell Signaling Technology | Cat# 5324; RRID: AB_10692650    |
| Rabbit monoclonal anti-ATF4                | 1:1000   | Cell Signaling Technology | Cat# 11815; RRID: AB_2616025    |
| Mouse monoclonal anti-CHOP                 | 1:1000   | Cell Signaling Technology | Cat# 2895; RRID: AB_2089254     |

**Supplementary Table 3.** Secondary antibodies and conjugated fluorophores used in this study.

| Antibody | Dilution | Source | Identifier |
|----------|----------|--------|------------|
|----------|----------|--------|------------|

Protect against lipid-induced htNSC senescence in ACP

|                                                                               |        |                           |                                      |
|-------------------------------------------------------------------------------|--------|---------------------------|--------------------------------------|
| Goat anti-Mouse IgG (H+L) Cross-Adsorbed Secondary Antibody, Alexa Fluor 488  | 1:1000 | Thermo Fischer Scientific | Cat# A-11001; RRID: AB_2534069       |
| Goat anti-Rat IgG (H+L) Cross-Adsorbed Secondary Antibody, Alexa Fluor 488    | 1:1000 | Thermo Fischer Scientific | Cat# A-11006; RRID: AB_2534074       |
| Donkey anti-Goat IgG (H+L) Cross-Adsorbed Secondary Antibody, Alexa Fluor 488 | 1:1000 | Thermo Fischer Scientific | Cat# A-11055; RRID: AB_2534102       |
| Goat anti-Rabbit IgG (H+L) Cross-Adsorbed Secondary Antibody, Alexa Fluor 594 | 1:1000 | Thermo Fischer Scientific | Cat# A-11012; RRID: AB_2534079       |
| HRP-conjugated goat anti-mouse IgG antibody                                   | 1:5000 | Jackson ImmunoResearch    | Cat # 115-035-003; RRID: AB_10015289 |
| HRP-conjugated goat anti-rabbit IgG antibody                                  | 1:5000 | Jackson ImmunoResearch    | Cat# 111-035-003; RRID: AB_2313567   |

**Supplementary Table 4.** Primers for Quantitative real-time PCR used in this study.

| Genes              | Forward primer (5' to 3')      | Reverse primer (5' to 3')      |
|--------------------|--------------------------------|--------------------------------|
| <i>Homo Cd36</i>   | <i>CTTTGGCTTAATGAGACTGGGAC</i> | <i>GCAACAAACATCACCACACCA</i>   |
| <i>Homo Ldlr</i>   | <i>ACGGCGTCTCTTCCTATGACA</i>   | <i>CCCTTGGTATCCGCAACAGA</i>    |
| <i>Homo Msr1</i>   | <i>GCAGTGGGATCACTTTCACAA</i>   | <i>AGCTGTCATTGAGCGAGCATC</i>   |
| <i>Homo Scarb1</i> | <i>ACTTCTGGCATTCCGATCAGT</i>   | <i>ACGAAGCGATAGGTGGGGAT</i>    |
| <i>Homo Olr1</i>   | <i>GAAACCCTTGCTCGGAAGCTGA</i>  | <i>CAGATCCAGTCTTGCGGACAAG</i>  |
| <i>Homo Eif2s1</i> | <i>GAAGGCGTATCCGTTCTATCAAC</i> | <i>AGCAACATGACGAAGAATGCTAT</i> |
| <i>Homo Atf4</i>   | <i>CTCCGGGACAGATTGGATGTT</i>   | <i>GGCTGCTTATTAGTCTCCTGGAC</i> |
| <i>Homo Ddit3</i>  | <i>GGAAACAGAGTGGTCATTCCC</i>   | <i>CTGCTTGAGCCGTTTATTCTC</i>   |
| <i>Homo Cdkn2a</i> | <i>ATGGAGCCTTCGGCTGACT</i>     | <i>GTAACATTCGGTGCCTTGGG</i>    |
| <i>Homo Cdkn1a</i> | <i>TGTCCGTCAGAACCCATGC</i>     | <i>AAAGTCGAAGTTCATCGCTC</i>    |
| <i>Homo Mmp3</i>   | <i>CACTCACAGACCTGACTCGGTT</i>  | <i>AAGCAGGATCACAGTTGGCTGG</i>  |

Protect against lipid-induced htNSC senescence in ACP

|                    |                                |                                |
|--------------------|--------------------------------|--------------------------------|
| <i>Homo Il1b</i>   | <i>CCACAGACCTTCCAGGAGAATG</i>  | <i>GTGCAGTTCAGTGATCGTACAGG</i> |
| <i>Homo Cxcl1</i>  | <i>AGCTTGCCCTCAATCCTGCATCC</i> | <i>TCCTTCAGGAACAGCCACCAGT</i>  |
| <i>Homo Cxcl8</i>  | <i>GAGAGTGATTGAGAGTGGACCAC</i> | <i>CACAACCCTCTGCACCCAGTTT</i>  |
| <i>Homo Il-6</i>   | <i>AGACAGCCACTCACCTCTTCAG</i>  | <i>TTCTGCCAGTGCCTCTTTGCTG</i>  |
| <i>Homo Ccl2</i>   | <i>GAGAGGCTGAGACTAACCCAGA</i>  | <i>ATCACAGCTTCTTTGGGACT</i>    |
| <i>Homo Vegfa</i>  | <i>TTGCCTTGCTGCTCTACCTCCA</i>  | <i>GATGGCAGTAGCTGCGCTGATA</i>  |
| <i>Homo Srebf1</i> | <i>CGGAACCATCTTGGCAACAGT</i>   | <i>CGCTTCTCAATGGCGTTGT</i>     |
| <i>Homo Srebf2</i> | <i>CCTGGGAGACATCGACGAGAT</i>   | <i>TGAATGACCGTTGCACTGAAG</i>   |
| <i>Homo Hmger</i>  | <i>TGATTGACCTTTCCAGAGCAAG</i>  | <i>CTAAAATTGCCATTCCACGAGC</i>  |
| <i>Homo Abca1</i>  | <i>ACCCACCCTATGAACAACATGA</i>  | <i>GAGTCGGGTAACGGAAACAGG</i>   |
| <i>Homo Gapdh</i>  | <i>GTCTCCTCTGACTTCAACAGCG</i>  | <i>ACCACCCTGTTGCTGTAGCCAA</i>  |
| <i>Mus Atf4</i>    | <i>AACCTCATGGGTTCTCCAGCGA</i>  | <i>CTCCAACATCCAATCTGTCCCG</i>  |
| <i>Mus Ddit3</i>   | <i>GGAGGTCCTGTCCTCAGATGAA</i>  | <i>GCTCCTCTGTCAGCCAAGCTAG</i>  |
| <i>Mus H2afx</i>   | <i>AACGACGAGGAGCTCAACAAGC</i>  | <i>TGGCGCTGCTCTTCTTGGGCA</i>   |
| <i>Mus Cdkn1a</i>  | <i>TCGCTGTCTTGCACTCTGGTGT</i>  | <i>CCAATCTGCGCTTGGAGTGATAG</i> |
| <i>Mus Gapdh</i>   | <i>CATCACTGCCACCCAGAAGACTG</i> | <i>ATGCCAGTGAGCTTCCCGTTCAG</i> |

**Supplementary Table 5.** Chemicals, peptides, recombinant proteins, and critical commercial assays used in this study.

| <b>Reagent</b>                                       | <b>Source</b> | <b>Identifier</b> |
|------------------------------------------------------|---------------|-------------------|
| <b>Chemicals, Peptides, and Recombinant Proteins</b> |               |                   |
| Hematoxylin solution                                 | ZSGB-BIO      | Cat# ZLI-9610     |
| Eosin solution                                       | ZSGB-BIO      | Cat# ZLI-9613     |
| DAB Detection Kit                                    | ZSGB-BIO      | Cat# ZLI-9017     |
| Oxidized low density lipoprotein (ox-LDL), human     | Solarbio      | Cat# IO1300       |

Protect against lipid-induced htNSC senescence in ACP

|                                                 |                           |                     |
|-------------------------------------------------|---------------------------|---------------------|
| Sulfo-N-succinimidyl oleate (SSO)               | MCE                       | Cat# HY-112847      |
| ISRIB                                           | Selleck                   | Cat# S0706          |
| GSK2606414                                      | Selleck                   | Cat# S7307          |
| Oxytocin (OXT)                                  | R&D Systems               | Cat# 1910/1         |
| OT receptor antagonist (OTRA; L-371257)         | Tocris Bioscience         | Cat# 2410/10        |
| BAY 11-7082                                     | Selleck                   | Cat# S2913          |
| Oil Red O                                       | Sigma-Aldrich             | Cat# O0625          |
| Filipin III                                     | Sigma-Aldrich             | Cat# SAE0087        |
| RIPA lysis buffer                               | Beyotime                  | Cat# P0013B         |
| Protease/phosphatase inhibitor cocktail         | Coolaber                  | Cat# SL1088         |
| Penicillin/Streptomycin                         | Thermo Fischer Scientific | Cat# 15140122       |
| Sodium citrate buffer (pH 6.0)                  | Solarbio                  | Cat# C1010          |
| Ethylenediaminetetraacetic acid (EDTA) (pH 8.0) | ZSGB-BIO                  | Cat# ZLI-9072       |
| ReadyProbes™ 2.5% Normal Goat Serum (1X)        | Thermo Fischer Scientific | Cat# R37624         |
| SlowFade™ Gold (DAPI)                           | Thermo Fischer Scientific | Cat# S36938         |
| BODIPY™ 493/503                                 | Thermo Fisher Scientific  | Cat# D3922          |
| BODIPY™ 581/591 C11                             | Thermo Fisher Scientific  | Cat# D3861          |
| Papain Dissociation Enzyme                      | Worthington Biochemical   | Cat# LS003119       |
| Neurobasal™-A                                   | Thermo Fischer Scientific | Cat# 10888022       |
| TrypLE™ Express Enzyme                          | Thermo Fischer Scientific | Cat# 12605010       |
| B-27™ Supplement (50X)                          | Thermo Fischer Scientific | Cat# 17504044       |
| EGF                                             | PeproTech                 | Cat# 100-15         |
| bFGF                                            | PeproTech                 | Cat# AF-100-18B-100 |
| Poly-L-ornithine hydrochloride                  | Sigma-Aldrich             | Cat# P2533          |
| Fetal bovine serum (FBS)                        | Thermo Fischer Scientific | Cat# 10099141       |



Protect against lipid-induced htNSC senescence in ACP

|                                               |                              |                  |
|-----------------------------------------------|------------------------------|------------------|
| Retinoic acid                                 | Sigma-Aldrich                | Cat# R2625       |
| Bovine serum albumin (BSA)                    | Sigma-Aldrich                | Cat# A1933       |
| Phosphate buffer solution (PBS; 10X)          | Solarbio                     | Cat# P1033       |
| Triton X-100                                  | Solarbio                     | Cat# P1080       |
| Primary antibody dilution buffer              | ZSGB-BIO                     | Cat# ZLI-902     |
| Sucrose                                       | Solarbio                     | Cat# S8271       |
| Dimethyl Sulfoxide (DMSO)                     | MP Bio                       | Cat# 196055      |
| 4% paraformaldehyde (PFA)                     | Solarbio                     | Cat# P1110       |
| Glutaraldehyde                                | Sigma-Aldrich                | Cat# G6257       |
| Sodium cacodylate                             | Sigma-Aldrich                | Cat# C0250       |
| Gelatin solution                              | Macklin                      | Cat# G885128     |
| Osmium tetroxide                              | Electron Microscopy Sciences | Cat# EMS 19100   |
| Uranyl acetate                                | Electron Microscopy Sciences | Cat# EMS 22400   |
| Ethanol                                       | VWR Chemicals                | Cat# 20821.321   |
| Epoxy resin                                   | Macklin                      | Cat# R832312     |
| Lead citrate                                  | Macklin                      | Cat# L885990     |
| HBSS                                          | Thermo Fischer Scientific    | Cat# C14175500BT |
| RNAiso Plus reagent                           | TaKaRa                       | Cat# 9108        |
| TB Green® Premix Ex Taq™ II (Tli RNaseH Plus) | TaKaRa                       | Cat# RR820A      |
| Isopropanol                                   | Aladdin                      | Cat# I112011     |
| Optimal Cutting Temperature (O.C.T.) Compound | Sakura                       | Cat# SAKURA 4583 |
| Tri-decanoyl glycerol                         | Sigma-Aldrich                | N/A              |
| Cholesteryl myristate                         | Sigma-Aldrich                | Cat# S455342     |
| Tri-nonadecanoyl glycerol                     | Sigma-Aldrich                | N/A              |
| NaOH                                          | Sigma-Aldrich                | Cat# S5881       |

Protect against lipid-induced htNSC senescence in ACP

|                                                  |                           |                  |
|--------------------------------------------------|---------------------------|------------------|
| Boron trifluoride-methanol solution              | Sigma-Aldrich             | Cat# B1252       |
| <b>Critical Commercial Assays</b>                |                           |                  |
| Senescence $\beta$ -galactosidase staining Kit   | Cell Signaling Technology | Cat# 9860        |
| PrimeScript™ RT reagent Kit (Perfect Real Time)  | TaKaRa                    | Cat# RR037A      |
| BCA Protein Assay Kit                            | Solarbio                  | Cat# PC0020      |
| Enhanced chemiluminescence (ECL) Plus blot kit   | MERCK Millipore           | Cat# WBULS0500   |
| Bradford Assay                                   | BioRad                    | Cat# 5000201     |
| <b>other</b>                                     |                           |                  |
| Polyvinylidene fluoride (PVDF) transfer membrane | MERCK Millipore           | Cat# IPVH00010   |
| Intracerebroventricular osmotic minipumps        | RWD Life Science          | Cat# 1002W       |
| Automatic stereotaxic apparatus                  | RWD Life Science          | Cat# 71000-M     |
| Indirect CD133 MicroBead Kit, human              | Miltenyi Biotec           | Cat# 130-091-895 |
| MACS magnetic separation column (LS Columns)     | Miltenyi Biotec           | Cat# 130-042-401 |
| LS Columns plus tubes                            | Miltenyi Biotec           | Cat# 130-122-729 |
| MACS® MultiStand                                 | Miltenyi Biotec           | Cat# 130-042-303 |
| MidiMACS™ Separator and Starting Kits            | Miltenyi Biotec           | Cat# 130-042-302 |

**Supplementary Table 6.** Software used in this study.

| <b>Software</b>          | <b>Source</b>                                          | <b>Identifier</b>                                                                                                   |
|--------------------------|--------------------------------------------------------|---------------------------------------------------------------------------------------------------------------------|
| ImageJ                   | National Institutes of Health                          | <a href="https://imagej.nih.gov/ij/download.html">https://imagej.nih.gov/ij/download.html</a>                       |
| GraphPad Prism 8.0       | GraphPad Software                                      | <a href="https://www.graphpad.com/scientificsoftware/prism/">https://www.graphpad.com/scientificsoftware/prism/</a> |
| IBM SPSS Statistics 20.0 | IBM Company                                            | <a href="https://www.ibm.com/products/spss-statistics">https://www.ibm.com/products/spss-statistics</a>             |
| RStudio v4.0.2           | N/A                                                    | <a href="http://www.r-project.org">www.r-project.org</a>                                                            |
| GSEA Desktop v4.1.0      | Broad Institute, Massachusetts Institute of Technology | <a href="http://software.broadinstitute.org/gsea/index.jsp">http://software.broadinstitute.org/gsea/index.jsp</a>   |

Protect against lipid-induced htNSC senescence in ACP

|                                 |       |                                                                                               |
|---------------------------------|-------|-----------------------------------------------------------------------------------------------|
| Adobe Photoshop CC 19.0         | Adobe | <a href="https://www.adobe.com/cn">https://www.adobe.com/cn</a>                               |
| Adobe Illustrator CC 19.0       | Adobe | <a href="https://www.adobe.com/cn">https://www.adobe.com/cn</a>                               |
| Gatan Microscopy Suite software | Gatan | <a href="https://www.gatan.com/products/tem-anal">https://www.gatan.com/products/tem-anal</a> |

**Supplementary Table 7. Gene list of DEGs between htNSCs and NSCs of SVZ.**

| No. | Gene ID    | baseMean    | log <sub>2</sub> FoldChange | lfcSE       | stat        | p value     | p adj       | regulated |
|-----|------------|-------------|-----------------------------|-------------|-------------|-------------|-------------|-----------|
| 1   | SELL       | 10.43853852 | 6.485363382                 | 1.360213238 | 4.767901974 | 1.86E-06    | 4.12E-05    | up        |
| 2   | CPN2       | 10.41815117 | 6.483325275                 | 1.254142021 | 5.169530376 | 2.35E-07    | 6.63E-06    | up        |
| 3   | F13A1      | 7.416015876 | 5.992785931                 | 2.029600777 | 2.952691977 | 0.003150161 | 0.020571018 | up        |
| 4   | KCNG2      | 25.3649823  | 5.735872594                 | 1.306362954 | 4.390718963 | 1.13E-05    | 0.000191693 | up        |
| 5   | TGM2       | 671.5248735 | 5.333306356                 | 0.839386905 | 6.35381172  | 2.10E-10    | 1.28E-08    | up        |
| 6   | IL32       | 18.30733366 | 5.243060626                 | 0.965507264 | 5.430368907 | 5.62E-08    | 1.92E-06    | up        |
| 7   | LRRC15     | 578.1009183 | 5.190315137                 | 0.72218015  | 7.18700886  | 6.62E-13    | 6.61E-11    | up        |
| 8   | C11orf44   | 7.010209138 | 5.170507849                 | 1.201228762 | 4.304349023 | 1.67E-05    | 0.000269779 | up        |
| 9   | CXCL8      | 4.165723509 | 5.160579849                 | 1.200908549 | 4.297229669 | 1.73E-05    | 0.000276836 | up        |
| 10  | PLEK2      | 3.546360264 | 4.926637795                 | 1.214243817 | 4.057371119 | 4.96E-05    | 0.000684538 | up        |
| 11  | IL7R       | 105.1641873 | 4.909530529                 | 0.717716169 | 6.840490356 | 7.89E-12    | 6.43E-10    | up        |
| 12  | FLJ22447   | 3.469672971 | 4.894060663                 | 1.252537138 | 3.907317808 | 9.33E-05    | 0.001162924 | up        |
| 13  | DUSP15     | 5.626397544 | 4.855472454                 | 1.1548711   | 4.204341467 | 2.62E-05    | 0.000396386 | up        |
| 14  | AC003092.1 | 3.278588576 | 4.811427487                 | 1.152433925 | 4.175013754 | 2.98E-05    | 0.000443489 | up        |
| 15  | MMP1       | 3.07932448  | 4.72468463                  | 1.320540288 | 3.577842094 | 0.000346443 | 0.003470141 | up        |
| 16  | AC004817.3 | 4.650716942 | 4.569288579                 | 1.255167674 | 3.640381023 | 0.000272235 | 0.002841094 | up        |
| 17  | AP000695.2 | 4.569923969 | 4.539438922                 | 1.203310703 | 3.772457861 | 0.000161647 | 0.001832572 | up        |

Protect against lipid-induced htNSC senescence in ACP

|    |            |             |             |             |             |             |             |    |
|----|------------|-------------|-------------|-------------|-------------|-------------|-------------|----|
| 18 | HLA-DMB    | 11.41941566 | 4.537166945 | 1.010244488 | 4.491157335 | 7.08E-06    | 0.000129089 | up |
| 19 | AP000695.1 | 4.459740281 | 4.506128903 | 1.200724653 | 3.752841162 | 0.000174842 | 0.00195387  | up |
| 20 | MLKL       | 2.610454147 | 4.489499841 | 1.175326885 | 3.819788264 | 0.000133566 | 0.001565655 | up |
| 21 | C11orf91   | 2.507791571 | 4.433641001 | 1.222880471 | 3.625571842 | 0.000288323 | 0.002986032 | up |
| 22 | KCTD4      | 10.30892525 | 4.41417702  | 0.927163144 | 4.760949623 | 1.93E-06    | 4.23E-05    | up |
| 23 | SLC22A3    | 65.93500088 | 4.412362978 | 0.939066682 | 4.698668438 | 2.62E-06    | 5.51E-05    | up |
| 24 | FOXL1      | 2.424425789 | 4.384372231 | 1.179469858 | 3.717239742 | 0.000201411 | 0.002202436 | up |
| 25 | CGB8       | 3.91521577  | 4.322982787 | 1.257177547 | 3.438641421 | 0.000584641 | 0.005352463 | up |
| 26 | C3orf80    | 3.208174869 | 4.014882866 | 1.279141832 | 3.138731583 | 0.001696808 | 0.012531269 | up |
| 27 | AQP7P1     | 2.979255801 | 3.911226016 | 1.135338575 | 3.444986457 | 0.000571088 | 0.005246477 | up |
| 28 | HLA-DPB1   | 7.309766373 | 3.895906463 | 1.031844682 | 3.775671406 | 0.000159577 | 0.001814155 | up |
| 29 | MMP9       | 22.43064087 | 3.800524714 | 1.400784911 | 2.713139386 | 0.006664907 | 0.036947949 | up |
| 30 | GREM1      | 216.1828895 | 3.782025899 | 0.506989149 | 7.459776811 | 8.67E-14    | 1.04E-11    | up |
| 31 | LINGO3     | 2.746644368 | 3.781565402 | 1.192697079 | 3.170600036 | 0.001521244 | 0.011463382 | up |
| 32 | TMEM92-AS1 | 6.656470875 | 3.766276274 | 1.000444429 | 3.764603176 | 0.000166814 | 0.001880673 | up |
| 33 | CD36       | 11.02482297 | 3.753110647 | 0.931046968 | 4.031064786 | 5.55E-05    | 0.000748206 | up |
| 34 | AC093627.3 | 10.9373774  | 3.725377881 | 0.870152235 | 4.281294389 | 1.86E-05    | 0.000295799 | up |
| 35 | TNFRSF8    | 8.555317543 | 3.714001234 | 1.149608252 | 3.230666817 | 0.001235018 | 0.009708959 | up |
| 36 | SMTNL2     | 4.360153091 | 3.713236962 | 1.219119758 | 3.045834454 | 0.002320356 | 0.016020603 | up |
| 37 | CETP       | 2.590989019 | 3.712144793 | 1.186836671 | 3.127763813 | 0.001761417 | 0.01291473  | up |
| 38 | CYP26C1    | 2.516706834 | 3.661408411 | 1.185266526 | 3.089101339 | 0.002007629 | 0.014307786 | up |
| 39 | ABCA4      | 10.2355602  | 3.622069025 | 0.98987579  | 3.659114672 | 0.000253088 | 0.002679558 | up |
| 40 | ADCY4      | 2.447120117 | 3.614478384 | 1.20105812  | 3.00941172  | 0.002617541 | 0.017676869 | up |
| 41 | APCDD1L    | 9.897276559 | 3.60163194  | 1.059310538 | 3.399977449 | 0.000673914 | 0.00602616  | up |
| 42 | PTGS2      | 11.49418893 | 3.544520444 | 0.712902139 | 4.971959331 | 6.63E-07    | 1.65E-05    | up |

Protect against lipid-induced htNSC senescence in ACP

|    |            |             |             |             |             |             |             |    |
|----|------------|-------------|-------------|-------------|-------------|-------------|-------------|----|
| 43 | KCNS3      | 3.817258822 | 3.522355116 | 1.16121178  | 3.033344286 | 0.002418595 | 0.016541825 | up |
| 44 | PKP1       | 13.41276479 | 3.520339526 | 0.701076573 | 5.021333848 | 5.13E-07    | 1.33E-05    | up |
| 45 | WNT9A      | 276.1023706 | 3.480443061 | 0.487700843 | 7.136430269 | 9.58E-13    | 9.16E-11    | up |
| 46 | PAPPA2     | 20.35048032 | 3.475794569 | 0.535266947 | 6.493572205 | 8.38E-11    | 5.57E-09    | up |
| 47 | AC137932.2 | 5.43528343  | 3.454437157 | 1.046218887 | 3.301830239 | 0.000960562 | 0.007995912 | up |
| 48 | HLA-DRB5   | 3.435705653 | 3.366362279 | 1.166923115 | 2.884819261 | 0.003916384 | 0.024289218 | up |
| 49 | MMP10      | 16.61348108 | 3.32723258  | 0.767755015 | 4.333716504 | 1.47E-05    | 0.00024113  | up |
| 50 | AMIGO2     | 234.5056691 | 3.317204219 | 0.318484767 | 10.41558204 | 2.11E-25    | 1.86E-22    | up |
| 51 | AC093627.1 | 13.11704893 | 3.307491784 | 0.713853171 | 4.633294237 | 3.60E-06    | 7.22E-05    | up |
| 52 | GATA6      | 6.616604161 | 3.306203349 | 0.885616236 | 3.733223505 | 0.000189045 | 0.002094858 | up |
| 53 | C3AR1      | 16.18206378 | 3.280070686 | 0.769203529 | 4.2642429   | 2.01E-05    | 0.000315265 | up |
| 54 | ANPEP      | 596.4341966 | 3.270701151 | 0.626443525 | 5.221063068 | 1.78E-07    | 5.26E-06    | up |
| 55 | VGLL2      | 37.3867824  | 3.245738708 | 0.81190366  | 3.997689463 | 6.40E-05    | 0.000843502 | up |
| 56 | LBX2-AS1   | 3.174018073 | 3.234655713 | 1.160095016 | 2.788267916 | 0.00529907  | 0.030835772 | up |
| 57 | OASL       | 6.156723688 | 3.207774607 | 0.85918575  | 3.733505363 | 0.000188833 | 0.002094135 | up |
| 58 | NPS        | 18.21835044 | 3.197689686 | 0.722636283 | 4.425033398 | 9.64E-06    | 0.000167094 | up |
| 59 | LINC01348  | 3.039163395 | 3.192934254 | 1.169231236 | 2.730797943 | 0.006318119 | 0.035411556 | up |
| 60 | AC100797.1 | 3.068422843 | 3.190756861 | 1.177343213 | 2.710133143 | 0.00672562  | 0.037232289 | up |
| 61 | AC254633.1 | 10.79564206 | 3.188464407 | 0.992823454 | 3.211511972 | 0.001320385 | 0.010233861 | up |
| 62 | C10orf90   | 10.23017974 | 3.130366312 | 0.69384674  | 4.511610607 | 6.43E-06    | 0.000118764 | up |
| 63 | HLA-DRB1   | 21.90191991 | 3.115823757 | 0.682647567 | 4.564322655 | 5.01E-06    | 9.58E-05    | up |
| 64 | GJB2       | 190.2847276 | 3.081299942 | 0.746641944 | 4.126877636 | 3.68E-05    | 0.000532138 | up |
| 65 | PDE6A      | 5.583085692 | 3.067413409 | 1.012706954 | 3.028924999 | 0.002454256 | 0.016757581 | up |
| 66 | LY96       | 4.238068716 | 3.059315253 | 0.965312003 | 3.169250193 | 0.001528328 | 0.011503986 | up |
| 67 | CYP1A1     | 43.56438763 | 3.036486653 | 0.455293495 | 6.669295051 | 2.57E-11    | 1.92E-09    | up |

Protect against lipid-induced htNSC senescence in ACP

|    |             |             |             |             |             |             |             |    |
|----|-------------|-------------|-------------|-------------|-------------|-------------|-------------|----|
| 68 | CRYBB1      | 4.169146041 | 3.028773459 | 1.060491828 | 2.856008297 | 0.004290039 | 0.026051145 | up |
| 69 | TBX6        | 6.74785922  | 2.988688438 | 0.797205308 | 3.748957025 | 0.000177572 | 0.001981114 | up |
| 70 | SPOCD1      | 118.6735377 | 2.980587874 | 0.543974281 | 5.479280877 | 4.27E-08    | 1.51E-06    | up |
| 71 | CHRNA1      | 15.91198577 | 2.974286766 | 0.591712264 | 5.026576173 | 4.99E-07    | 1.30E-05    | up |
| 72 | PTPRN       | 95.02462815 | 2.915231138 | 0.349852713 | 8.332738403 | 7.90E-17    | 1.68E-14    | up |
| 73 | SHISAL1     | 146.1992376 | 2.909530077 | 0.5093481   | 5.71226255  | 1.11E-08    | 4.62E-07    | up |
| 74 | CYP1B1      | 1326.535778 | 2.906073279 | 0.41925497  | 6.931517777 | 4.16E-12    | 3.49E-10    | up |
| 75 | GOLGA7B     | 7.664061287 | 2.88821184  | 0.795069827 | 3.6326518   | 0.000280523 | 0.002918619 | up |
| 76 | P4HA3       | 54.99405136 | 2.856988288 | 0.347860675 | 8.213024622 | 2.16E-16    | 4.26E-14    | up |
| 77 | CREG2       | 3.624882783 | 2.82740619  | 1.045056927 | 2.705504473 | 0.006820073 | 0.037581463 | up |
| 78 | IFITM10     | 27.44902617 | 2.81912729  | 0.390002266 | 7.228489513 | 4.88E-13    | 5.02E-11    | up |
| 79 | PCBP3       | 4.851245213 | 2.807982249 | 0.899337394 | 3.122278988 | 0.001794568 | 0.013110584 | up |
| 80 | TEX29       | 9.477345509 | 2.799338397 | 0.732959241 | 3.819227918 | 0.00013387  | 0.00156651  | up |
| 81 | COL10A1     | 34.08433517 | 2.798595062 | 0.794862321 | 3.520855105 | 0.000430158 | 0.004154857 | up |
| 82 | TIE1        | 130.0285903 | 2.790407476 | 0.390614107 | 7.143642338 | 9.09E-13    | 8.73E-11    | up |
| 83 | C6orf15     | 32.96579649 | 2.789306803 | 0.937074863 | 2.976610421 | 0.002914541 | 0.01926513  | up |
| 84 | HTRA3       | 20.35149622 | 2.772459172 | 0.729386877 | 3.801081782 | 0.000144066 | 0.001661939 | up |
| 85 | SLC16A3     | 459.9310738 | 2.764510407 | 0.45573961  | 6.065986681 | 1.31E-09    | 6.53E-08    | up |
| 86 | DHRS2       | 3.467025804 | 2.748712804 | 1.01612827  | 2.705084472 | 0.006828702 | 0.037582098 | up |
| 87 | SLC7A11-AS1 | 4.585584277 | 2.730398956 | 0.950561188 | 2.872407365 | 0.004073575 | 0.025094061 | up |
| 88 | THBS1       | 8896.208708 | 2.722483348 | 0.199038817 | 13.67815281 | 1.37E-42    | 9.31E-39    | up |
| 89 | IFNE        | 5.67458609  | 2.720865679 | 0.772821664 | 3.520690228 | 0.000430425 | 0.00415547  | up |
| 90 | A4GALT      | 21.26254836 | 2.694377569 | 0.517264976 | 5.208892333 | 1.90E-07    | 5.53E-06    | up |
| 91 | MSC         | 260.1568927 | 2.679908227 | 0.327281166 | 8.188397328 | 2.65E-16    | 5.09E-14    | up |
| 92 | LUCAT1      | 139.6365841 | 2.661437433 | 0.35678517  | 7.459495672 | 8.69E-14    | 1.04E-11    | up |



Protect against lipid-induced htNSC senescence in ACP

|     |            |             |             |             |             |             |             |    |
|-----|------------|-------------|-------------|-------------|-------------|-------------|-------------|----|
| 93  | TFCP2L1    | 62.50704347 | 2.641379339 | 0.724780216 | 3.644386644 | 0.00026803  | 0.002805842 | up |
| 94  | LINC02081  | 6.467900696 | 2.630934132 | 0.853928181 | 3.080978225 | 0.002063217 | 0.014601727 | up |
| 95  | PTPN22     | 7.226399884 | 2.57667202  | 0.707699996 | 3.64091004  | 0.000271676 | 0.002836716 | up |
| 96  | AC069029.1 | 3.071914343 | 2.566148791 | 0.980543874 | 2.617066772 | 0.008868899 | 0.04620769  | up |
| 97  | SLC7A11    | 531.7677467 | 2.558158657 | 0.235299768 | 10.87191323 | 1.57E-27    | 2.13E-24    | up |
| 98  | SGK1       | 69.23421109 | 2.555961758 | 0.263124132 | 9.71390097  | 2.63E-22    | 1.49E-19    | up |
| 99  | COL7A1     | 3594.521834 | 2.537851    | 0.512464977 | 4.952242815 | 7.34E-07    | 1.81E-05    | up |
| 100 | CD274      | 131.8639472 | 2.507600553 | 0.252088604 | 9.947298339 | 2.59E-23    | 1.70E-20    | up |
| 101 | CD74       | 638.6851149 | 2.5065036   | 0.692896851 | 3.617426745 | 0.000297547 | 0.00305977  | up |
| 102 | PRR15      | 6.930870976 | 2.504411405 | 0.697602217 | 3.590027877 | 0.000330643 | 0.003341049 | up |
| 103 | MYC        | 192.3073287 | 2.502155033 | 0.306376404 | 8.166931257 | 3.16E-16    | 5.96E-14    | up |
| 104 | ITGB3      | 69.17028309 | 2.502076033 | 0.469463202 | 5.329653147 | 9.84E-08    | 3.11E-06    | up |
| 105 | OPCML      | 55.73600929 | 2.473498816 | 0.672865317 | 3.67606823  | 0.000236856 | 0.002532893 | up |
| 106 | TLR6       | 8.642503118 | 2.469802262 | 0.635124745 | 3.888688453 | 0.000100787 | 0.001236969 | up |
| 107 | HLA-DPA1   | 28.73683084 | 2.449327751 | 0.63675272  | 3.846591738 | 0.000119772 | 0.001426131 | up |
| 108 | CHAC1      | 47.87916617 | 2.424202482 | 0.703299519 | 3.446899104 | 0.00056706  | 0.005212603 | up |
| 109 | KCNN2      | 22.31165885 | 2.407726351 | 0.516979306 | 4.657297345 | 3.20E-06    | 6.50E-05    | up |
| 110 | IL1R1      | 104.7593336 | 2.407481243 | 0.65942756  | 3.650865372 | 0.000261358 | 0.00274588  | up |
| 111 | RGS16      | 606.6298495 | 2.395331328 | 0.581667509 | 4.118042163 | 3.82E-05    | 0.000549438 | up |
| 112 | MICAL2     | 503.8399218 | 2.395278355 | 0.459577079 | 5.211918666 | 1.87E-07    | 5.46E-06    | up |
| 113 | AC100810.3 | 4.627396016 | 2.380667654 | 0.816769733 | 2.914735401 | 0.003559902 | 0.022531293 | up |
| 114 | SYT7       | 32.96830219 | 2.379811494 | 0.487456566 | 4.882099578 | 1.05E-06    | 2.49E-05    | up |
| 115 | BMP4       | 8.33165883  | 2.373418836 | 0.910537814 | 2.606612047 | 0.00914429  | 0.047255556 | up |
| 116 | FILIP1L    | 714.809602  | 2.368334884 | 0.306640709 | 7.723484893 | 1.13E-14    | 1.66E-12    | up |
| 117 | AL118505.1 | 3.639205638 | 2.362297849 | 0.873781241 | 2.703534636 | 0.00686063  | 0.037713089 | up |

Protect against lipid-induced htNSC senescence in ACP

|     |            |             |             |             |             |             |             |    |
|-----|------------|-------------|-------------|-------------|-------------|-------------|-------------|----|
| 118 | AC008687.4 | 9.826940184 | 2.331915832 | 0.567303889 | 4.11052326  | 3.95E-05    | 0.000566041 | up |
| 119 | WNT7B      | 953.4050449 | 2.330522418 | 0.449955801 | 5.179447432 | 2.23E-07    | 6.33E-06    | up |
| 120 | PODNL1     | 47.20967257 | 2.317760693 | 0.691088407 | 3.353783206 | 0.000797148 | 0.006915521 | up |
| 121 | DYSF       | 7.959108023 | 2.314230703 | 0.664524679 | 3.482535377 | 0.00049669  | 0.004675495 | up |
| 122 | AC037198.1 | 15.1287254  | 2.309521658 | 0.584006226 | 3.954618216 | 7.67E-05    | 0.000987231 | up |
| 123 | MFAP2      | 1733.829122 | 2.307961048 | 0.541008049 | 4.266038281 | 1.99E-05    | 0.000313327 | up |
| 124 | ICAM1      | 62.53797695 | 2.302764824 | 0.718800573 | 3.203621296 | 0.001357109 | 0.010470666 | up |
| 125 | ACKR3      | 20.47343368 | 2.28868861  | 0.647451907 | 3.534916781 | 0.000407904 | 0.003970041 | up |
| 126 | MIR31HG    | 4.981658566 | 2.269394147 | 0.847598673 | 2.677439477 | 0.007418725 | 0.039918781 | up |
| 127 | SLC14A1    | 11.92942636 | 2.268553535 | 0.510112732 | 4.447161173 | 8.70E-06    | 0.000152336 | up |
| 128 | GCLM       | 1141.930924 | 2.257268272 | 0.435046738 | 5.188564987 | 2.12E-07    | 6.09E-06    | up |
| 129 | AC068580.4 | 6.671442497 | 2.246736394 | 0.664702653 | 3.380062323 | 0.000724694 | 0.006409858 | up |
| 130 | OLFML2B    | 558.9396881 | 2.24075018  | 0.528264637 | 4.241719057 | 2.22E-05    | 0.000343449 | up |
| 131 | PCED1B     | 35.08019464 | 2.209956442 | 0.34784444  | 6.353289543 | 2.11E-10    | 1.28E-08    | up |
| 132 | KIAA1755   | 6.439547052 | 2.194333362 | 0.789911712 | 2.777947624 | 0.005470344 | 0.031645752 | up |
| 133 | KIT        | 11.90520416 | 2.19088133  | 0.696257926 | 3.146651908 | 0.001651514 | 0.012276921 | up |
| 134 | ADM        | 25.73759686 | 2.171406057 | 0.38014385  | 5.71206415  | 1.12E-08    | 4.62E-07    | up |
| 135 | HLA-DRA    | 276.4730452 | 2.16368359  | 0.622267153 | 3.477097544 | 0.000506873 | 0.004751588 | up |
| 136 | PDCD6IPP2  | 6.414263218 | 2.158932221 | 0.654185126 | 3.300185428 | 0.00096621  | 0.008032927 | up |
| 137 | COL13A1    | 83.80737219 | 2.158773016 | 0.637540245 | 3.386096849 | 0.000708944 | 0.006292415 | up |
| 138 | FAM20C     | 7824.561246 | 2.135869157 | 0.387610643 | 5.510347035 | 3.58E-08    | 1.30E-06    | up |
| 139 | SMIM11A    | 50.80561146 | 2.133304343 | 0.692657108 | 3.079885151 | 0.002070804 | 0.014650329 | up |
| 140 | CCL2       | 156.6008269 | 2.131834931 | 0.353316701 | 6.03377911  | 1.60E-09    | 7.80E-08    | up |
| 141 | SMIM32     | 142.7125081 | 2.103629293 | 0.522938814 | 4.022706361 | 5.75E-05    | 0.000773224 | up |
| 142 | AC241585.2 | 4.560103464 | 2.102207218 | 0.761733524 | 2.75976723  | 0.005784256 | 0.033119582 | up |

Protect against lipid-induced htNSC senescence in ACP

|     |             |             |             |             |             |             |             |    |
|-----|-------------|-------------|-------------|-------------|-------------|-------------|-------------|----|
| 143 | ULBP1       | 42.6802973  | 2.100409949 | 0.448096472 | 4.687405685 | 2.77E-06    | 5.75E-05    | up |
| 144 | TCAF2       | 39.27473247 | 2.096511276 | 0.380941192 | 5.503503742 | 3.72E-08    | 1.35E-06    | up |
| 145 | PKIB        | 55.66832099 | 2.075342176 | 0.299027083 | 6.940315078 | 3.91E-12    | 3.31E-10    | up |
| 146 | MOCOS       | 26.37502503 | 2.064459911 | 0.417557397 | 4.94413445  | 7.65E-07    | 1.88E-05    | up |
| 147 | UCN2        | 25.28679769 | 2.064128438 | 0.430613156 | 4.793463478 | 1.64E-06    | 3.68E-05    | up |
| 148 | KDR         | 134.3297229 | 2.063520276 | 0.691886481 | 2.982454974 | 0.002859467 | 0.019008034 | up |
| 149 | ARHGEF38    | 4.435780238 | 2.04832497  | 0.754644684 | 2.714290598 | 0.006641788 | 0.036848348 | up |
| 150 | CIITA       | 410.0965413 | 2.033118751 | 0.589280832 | 3.450169496 | 0.000560235 | 0.005159176 | up |
| 151 | LAPTM5      | 15.19014875 | 2.004806081 | 0.446922144 | 4.485806106 | 7.26E-06    | 0.000131233 | up |
| 152 | SIGLEC15    | 19.43138373 | 2.004153222 | 0.471632946 | 4.249391906 | 2.14E-05    | 0.000332653 | up |
| 153 | AL390719.1  | 47.47967665 | 1.998026163 | 0.382902926 | 5.218101062 | 1.81E-07    | 5.32E-06    | up |
| 154 | GPR160      | 10.84267679 | 1.995332505 | 0.594548439 | 3.356046998 | 0.000790651 | 0.00686794  | up |
| 155 | HLA-DMA     | 85.54135275 | 1.986931347 | 0.582068815 | 3.41356777  | 0.000641182 | 0.005784275 | up |
| 156 | MYLK2       | 11.30517481 | 1.977156199 | 0.553868998 | 3.569718118 | 0.000357366 | 0.003551613 | up |
| 157 | OGN         | 18.70172454 | 1.973647839 | 0.68884939  | 2.865136947 | 0.004168289 | 0.025536522 | up |
| 158 | PDGFB       | 49.44741666 | 1.966427521 | 0.4444474   | 4.424432503 | 9.67E-06    | 0.000167418 | up |
| 159 | DSC2        | 7.775339419 | 1.962616047 | 0.561273352 | 3.496720517 | 0.000471015 | 0.004487757 | up |
| 160 | MPP4        | 77.22912715 | 1.945808997 | 0.219336471 | 8.871342665 | 7.23E-19    | 2.20E-16    | up |
| 161 | FOSL2       | 3698.51912  | 1.941012928 | 0.412800274 | 4.702063079 | 2.58E-06    | 5.43E-05    | up |
| 162 | JAKMIP2-AS1 | 275.7782887 | 1.937317017 | 0.280803398 | 6.899193639 | 5.23E-12    | 4.35E-10    | up |
| 163 | ITGA2       | 7.529661782 | 1.908895598 | 0.605841962 | 3.150814433 | 0.001628159 | 0.012112147 | up |
| 164 | ADCY7       | 28.67955753 | 1.907972901 | 0.380629212 | 5.012681218 | 5.37E-07    | 1.38E-05    | up |
| 165 | KIF26B      | 701.153606  | 1.903966447 | 0.516528324 | 3.686083337 | 0.000227732 | 0.002446885 | up |
| 166 | SPHK1       | 111.3224078 | 1.903931976 | 0.354650323 | 5.36847664  | 7.94E-08    | 2.60E-06    | up |
| 167 | PLEKHN1     | 15.89104101 | 1.897467028 | 0.521507355 | 3.638428128 | 0.000274307 | 0.002859789 | up |

Protect against lipid-induced htNSC senescence in ACP

|     |            |             |             |             |             |             |             |    |
|-----|------------|-------------|-------------|-------------|-------------|-------------|-------------|----|
| 168 | FAP        | 228.0928443 | 1.894038099 | 0.227561047 | 8.323208758 | 8.56E-17    | 1.78E-14    | up |
| 169 | FGD5       | 11.46889277 | 1.88451943  | 0.548656631 | 3.434788397 | 0.000593017 | 0.005416964 | up |
| 170 | AL627309.7 | 8.062784916 | 1.882436019 | 0.564944444 | 3.332072805 | 0.000862017 | 0.007343736 | up |
| 171 | HLA-DOA    | 34.99567221 | 1.881387769 | 0.606137952 | 3.103893694 | 0.001909919 | 0.013780251 | up |
| 172 | GPR150     | 5.92231789  | 1.871592569 | 0.701646306 | 2.667430234 | 0.007643376 | 0.040900597 | up |
| 173 | RCAN2      | 81.7464546  | 1.870977253 | 0.603284194 | 3.101319864 | 0.001926601 | 0.013876022 | up |
| 174 | NKD2       | 7.207506641 | 1.865483701 | 0.669216341 | 2.787564478 | 0.005310588 | 0.030885145 | up |
| 175 | TMEM255B   | 17.41131713 | 1.85975664  | 0.541024651 | 3.437471173 | 0.000587173 | 0.005373147 | up |
| 176 | COL22A1    | 4258.081909 | 1.858157934 | 0.523639136 | 3.548546715 | 0.000387363 | 0.00380232  | up |
| 177 | SLCO2A1    | 302.2364968 | 1.852057648 | 0.236462283 | 7.832359652 | 4.79E-15    | 7.68E-13    | up |
| 178 | MFAP5      | 91.1295132  | 1.843149528 | 0.390904403 | 4.715090216 | 2.42E-06    | 5.15E-05    | up |
| 179 | CLDN7      | 8.728981279 | 1.836699396 | 0.640612039 | 2.867100967 | 0.004142508 | 0.025421312 | up |
| 180 | AC123595.1 | 9.809948032 | 1.835264098 | 0.551213353 | 3.329498619 | 0.000870025 | 0.007402665 | up |
| 181 | GDNF       | 5.277323188 | 1.831540506 | 0.664727435 | 2.755325581 | 0.005863376 | 0.033487852 | up |
| 182 | CNTN1      | 452.2140787 | 1.829657669 | 0.196122559 | 9.329154565 | 1.07E-20    | 4.53E-18    | up |
| 183 | SLC7A5     | 5987.634005 | 1.823921895 | 0.270683896 | 6.73819876  | 1.60E-11    | 1.25E-09    | up |
| 184 | SLC2A1     | 6271.56937  | 1.823361576 | 0.132355168 | 13.77627789 | 3.54E-43    | 7.21E-39    | up |
| 185 | L1CAM      | 21.43587289 | 1.820644368 | 0.395937517 | 4.598312329 | 4.26E-06    | 8.35E-05    | up |
| 186 | VDR        | 659.1215023 | 1.818717664 | 0.271397505 | 6.701305758 | 2.07E-11    | 1.56E-09    | up |
| 187 | B4GALT1    | 3118.651107 | 1.816066369 | 0.22530513  | 8.060474991 | 7.60E-16    | 1.35E-13    | up |
| 188 | FMN1       | 124.9428411 | 1.811695257 | 0.51643388  | 3.508087535 | 0.000451341 | 0.004322551 | up |
| 189 | HMOX1      | 363.3530821 | 1.811377516 | 0.204413758 | 8.861328785 | 7.91E-19    | 2.37E-16    | up |
| 190 | PLAUR      | 377.5089595 | 1.810558367 | 0.327907517 | 5.521551883 | 3.36E-08    | 1.23E-06    | up |
| 191 | TFPI2      | 308.7292928 | 1.806599186 | 0.579785639 | 3.115977812 | 0.001833361 | 0.013330653 | up |
| 192 | MESP2      | 6.432347879 | 1.80034125  | 0.621340186 | 2.897512974 | 0.003761342 | 0.02347783  | up |

Protect against lipid-induced htNSC senescence in ACP

|     |            |             |             |             |             |             |             |    |
|-----|------------|-------------|-------------|-------------|-------------|-------------|-------------|----|
| 193 | NDRG1      | 303.052982  | 1.799717745 | 0.186624227 | 9.643537565 | 5.24E-22    | 2.81E-19    | up |
| 194 | TNFAIP3    | 148.5840567 | 1.797311594 | 0.365668754 | 4.91513583  | 8.87E-07    | 2.15E-05    | up |
| 195 | TPD52L1    | 61.07942122 | 1.794463625 | 0.391673054 | 4.581534539 | 4.62E-06    | 8.93E-05    | up |
| 196 | GDF5       | 21.20710926 | 1.78656736  | 0.372907479 | 4.790913185 | 1.66E-06    | 3.71E-05    | up |
| 197 | CPA4       | 26.78357393 | 1.785528502 | 0.50169687  | 3.558978756 | 0.0003723   | 0.003676233 | up |
| 198 | DLG1       | 3679.197709 | 1.779816312 | 0.22682511  | 7.846645883 | 4.27E-15    | 7.02E-13    | up |
| 199 | CFH        | 57.16153924 | 1.764413487 | 0.469177913 | 3.760649076 | 0.000169473 | 0.001906431 | up |
| 200 | TGFA       | 245.8684248 | 1.763999398 | 0.298985667 | 5.899946363 | 3.64E-09    | 1.65E-07    | up |
| 201 | GPRC5A     | 24.05035014 | 1.759078664 | 0.436118137 | 4.033491192 | 5.50E-05    | 0.0007415   | up |
| 202 | CD40       | 26.36958938 | 1.7571413   | 0.382571407 | 4.59297602  | 4.37E-06    | 8.54E-05    | up |
| 203 | ATP8B3     | 15.70901115 | 1.755972482 | 0.452533887 | 3.880311582 | 0.000104323 | 0.001274979 | up |
| 204 | SLITRK6    | 29.86028653 | 1.750018523 | 0.285840256 | 6.122365504 | 9.22E-10    | 4.81E-08    | up |
| 205 | CAPG       | 175.8932657 | 1.747503459 | 0.21605937  | 8.088070696 | 6.06E-16    | 1.08E-13    | up |
| 206 | AC009229.3 | 12.30824847 | 1.745791902 | 0.488355216 | 3.574840291 | 0.000350442 | 0.00350115  | up |
| 207 | FN1        | 1024.019977 | 1.739773809 | 0.500911762 | 3.473214129 | 0.000514265 | 0.004803187 | up |
| 208 | CHST15     | 154.125922  | 1.734743246 | 0.513593805 | 3.377656093 | 0.000731064 | 0.006441023 | up |
| 209 | C3orf52    | 44.13347036 | 1.727668839 | 0.248800167 | 6.944001941 | 3.81E-12    | 3.23E-10    | up |
| 210 | NIPAL1     | 9.182825983 | 1.72669397  | 0.530472937 | 3.255008592 | 0.001133889 | 0.009087948 | up |
| 211 | EMP2       | 1224.972796 | 1.725840667 | 0.489453618 | 3.526055591 | 0.000421798 | 0.004083803 | up |
| 212 | SERPINA5   | 36.82014722 | 1.719350118 | 0.383068101 | 4.488366725 | 7.18E-06    | 0.000129896 | up |
| 213 | FOXS1      | 18.48356082 | 1.716684949 | 0.553337422 | 3.102419756 | 0.001919456 | 0.013844151 | up |
| 214 | MMP14      | 14791.68349 | 1.716673865 | 0.41619704  | 4.1246662   | 3.71E-05    | 0.000536514 | up |
| 215 | SCN5A      | 7.281664183 | 1.712783947 | 0.624399684 | 2.743089068 | 0.006086417 | 0.034452473 | up |
| 216 | LACC1      | 28.99295411 | 1.707975855 | 0.357289699 | 4.78036691  | 1.75E-06    | 3.89E-05    | up |
| 217 | FXYD5      | 133.8865044 | 1.703984844 | 0.244114825 | 6.980259585 | 2.95E-12    | 2.56E-10    | up |

Protect against lipid-induced htNSC senescence in ACP

|     |            |             |             |             |             |             |             |    |
|-----|------------|-------------|-------------|-------------|-------------|-------------|-------------|----|
| 218 | TCIM       | 345.4433571 | 1.700947645 | 0.42802539  | 3.973940992 | 7.07E-05    | 0.000917388 | up |
| 219 | SERPINE1   | 1521.069313 | 1.698856517 | 0.274360803 | 6.192052581 | 5.94E-10    | 3.24E-08    | up |
| 220 | SEL1L3     | 1006.675035 | 1.691035769 | 0.375288873 | 4.505957646 | 6.61E-06    | 0.000121311 | up |
| 221 | NNMT       | 1474.274945 | 1.685780291 | 0.224406067 | 7.512186785 | 5.81E-14    | 7.26E-12    | up |
| 222 | MIAT       | 3430.045989 | 1.684359342 | 0.530161543 | 3.177068132 | 0.001487721 | 0.011277544 | up |
| 223 | RGS2       | 159.813435  | 1.671784295 | 0.376798348 | 4.436814292 | 9.13E-06    | 0.000158885 | up |
| 224 | RNF128     | 36.16203296 | 1.670019251 | 0.430305551 | 3.881007922 | 0.000104024 | 0.001273627 | up |
| 225 | EDN1       | 115.3127421 | 1.664761116 | 0.3529112   | 4.717223804 | 2.39E-06    | 5.10E-05    | up |
| 226 | COL1A2     | 122.0167879 | 1.661008217 | 0.305463611 | 5.437663134 | 5.40E-08    | 1.85E-06    | up |
| 227 | LIF        | 2787.667378 | 1.659211853 | 0.370284648 | 4.480909111 | 7.43E-06    | 0.000133924 | up |
| 228 | MYO1D      | 16.68068747 | 1.658405161 | 0.406942746 | 4.075278841 | 4.60E-05    | 0.000640504 | up |
| 229 | AL139220.2 | 13.14970355 | 1.656835565 | 0.587773734 | 2.818832262 | 0.00481987  | 0.028594805 | up |
| 230 | MAP3K5     | 595.2740024 | 1.655937839 | 0.130121003 | 12.72613801 | 4.23E-37    | 1.23E-33    | up |
| 231 | DIRC3      | 36.98657191 | 1.649010361 | 0.255573044 | 6.452207707 | 1.10E-10    | 7.13E-09    | up |
| 232 | CRISPLD2   | 72.93411936 | 1.646141832 | 0.264504457 | 6.223493748 | 4.86E-10    | 2.73E-08    | up |
| 233 | APOL3      | 9.960682773 | 1.637301036 | 0.545277171 | 3.002695003 | 0.002676005 | 0.018023861 | up |
| 234 | MDGA1      | 350.570009  | 1.636841673 | 0.432216663 | 3.787086002 | 0.000152424 | 0.001741589 | up |
| 235 | GALNT18    | 6.968438602 | 1.632716702 | 0.574824181 | 2.840375816 | 0.004506041 | 0.027184447 | up |
| 236 | AC036214.1 | 9.851173871 | 1.632204897 | 0.464779473 | 3.511783527 | 0.00044511  | 0.004276967 | up |
| 237 | SPSB1      | 146.1658404 | 1.631932496 | 0.231274752 | 7.056250122 | 1.71E-12    | 1.57E-10    | up |
| 238 | INHBE      | 9.874816268 | 1.631124185 | 0.504856964 | 3.23086399  | 0.001234167 | 0.009706012 | up |
| 239 | ADAM12     | 4132.243075 | 1.612042094 | 0.242276839 | 6.65371936  | 2.86E-11    | 2.10E-09    | up |
| 240 | GFPT2      | 1331.996537 | 1.611332409 | 0.201498607 | 7.996742186 | 1.28E-15    | 2.22E-13    | up |
| 241 | MET        | 522.6037761 | 1.611321412 | 0.228531409 | 7.050765668 | 1.78E-12    | 1.62E-10    | up |
| 242 | AC092611.3 | 6.351270342 | 1.611282548 | 0.608923771 | 2.646115365 | 0.008142204 | 0.043150292 | up |



Protect against lipid-induced htNSC senescence in ACP

|     |            |             |             |             |             |             |             |    |
|-----|------------|-------------|-------------|-------------|-------------|-------------|-------------|----|
| 243 | PLA2G4A    | 49.19973711 | 1.610853342 | 0.415904192 | 3.873135628 | 0.000107444 | 0.001305291 | up |
| 244 | MTHFS      | 17.81996771 | 1.610733273 | 0.35361063  | 4.555104227 | 5.24E-06    | 9.94E-05    | up |
| 245 | STC2       | 47.89068061 | 1.606609764 | 0.456200748 | 3.521716632 | 0.000428762 | 0.004143345 | up |
| 246 | RHBDF2     | 133.6073892 | 1.602411154 | 0.205637949 | 7.792390277 | 6.58E-15    | 1.03E-12    | up |
| 247 | IL11       | 135.3482205 | 1.600171621 | 0.263254696 | 6.078416253 | 1.21E-09    | 6.12E-08    | up |
| 248 | ARRDC3     | 4740.587026 | 1.599290429 | 0.208726233 | 7.662143873 | 1.83E-14    | 2.47E-12    | up |
| 249 | REPS2      | 16.86188254 | 1.593823102 | 0.408908654 | 3.897748522 | 9.71E-05    | 0.001201017 | up |
| 250 | SKAP2      | 9.114414665 | 1.590723888 | 0.531874329 | 2.990788992 | 0.002782577 | 0.018606256 | up |
| 251 | FAM83G     | 64.3145365  | 1.588295003 | 0.291769198 | 5.443669225 | 5.22E-08    | 1.80E-06    | up |
| 252 | ZMIZ1-AS1  | 11.8689445  | 1.586614488 | 0.435672284 | 3.64176136  | 0.000270779 | 0.0028288   | up |
| 253 | CDH6       | 118.6827624 | 1.585915015 | 0.296906599 | 5.341460977 | 9.22E-08    | 2.94E-06    | up |
| 254 | DEPP1      | 47.94419911 | 1.585625522 | 0.382080022 | 4.149982807 | 3.33E-05    | 0.000486703 | up |
| 255 | IL15RA     | 52.50297004 | 1.581840233 | 0.47713601  | 3.315281597 | 0.000915508 | 0.00770594  | up |
| 256 | FSTL3      | 361.2092359 | 1.5774316   | 0.402510746 | 3.91898009  | 8.89E-05    | 0.001118339 | up |
| 257 | PADI2      | 130.1056249 | 1.575834891 | 0.497001662 | 3.170683341 | 0.001520808 | 0.011463382 | up |
| 258 | DSG2       | 45.27188172 | 1.557767231 | 0.30464298  | 5.113419096 | 3.16E-07    | 8.57E-06    | up |
| 259 | MATN3      | 27.62316571 | 1.55363143  | 0.313599799 | 4.954185036 | 7.26E-07    | 1.80E-05    | up |
| 260 | SLFN5      | 129.7344687 | 1.551150771 | 0.309860038 | 5.00597232  | 5.56E-07    | 1.41E-05    | up |
| 261 | CDKN1A     | 13886.37949 | 1.550394623 | 0.472037548 | 3.284473085 | 0.001021733 | 0.008382542 | up |
| 262 | AC007325.4 | 20.71022036 | 1.549920218 | 0.560807043 | 2.763731725 | 0.00571445  | 0.03281216  | up |
| 263 | ATF4       | 8756.766697 | 1.548307179 | 0.234699175 | 6.596986033 | 4.20E-11    | 2.97E-09    | up |
| 264 | PGM2L1     | 798.6672152 | 1.54802354  | 0.200458635 | 7.722408882 | 1.14E-14    | 1.66E-12    | up |
| 265 | ZNF469     | 40.89534523 | 1.546585723 | 0.256227493 | 6.035986635 | 1.58E-09    | 7.73E-08    | up |
| 266 | PDK4       | 41.08589963 | 1.54163093  | 0.355991004 | 4.330533396 | 1.49E-05    | 0.000243854 | up |
| 267 | 4-Mar      | 11.22319177 | 1.539110968 | 0.521221631 | 2.952891587 | 0.003148125 | 0.020568647 | up |

Protect against lipid-induced htNSC senescence in ACP

|     |             |             |             |             |             |             |             |    |
|-----|-------------|-------------|-------------|-------------|-------------|-------------|-------------|----|
| 268 | CSF1R       | 16.97159455 | 1.5338688   | 0.388683579 | 3.946317478 | 7.94E-05    | 0.001016912 | up |
| 269 | PERP        | 161.45854   | 1.528281083 | 0.160544084 | 9.519385875 | 1.74E-21    | 7.88E-19    | up |
| 270 | IGFBP3      | 2928.354984 | 1.525990684 | 0.198024103 | 7.706085588 | 1.30E-14    | 1.83E-12    | up |
| 271 | NRP2        | 1666.52028  | 1.509711835 | 0.170994849 | 8.828990134 | 1.06E-18    | 3.03E-16    | up |
| 272 | VCAN-AS1    | 21.98421676 | 1.506525882 | 0.482237151 | 3.124035298 | 0.001783891 | 0.013041937 | up |
| 273 | C3orf67     | 18.28150913 | 1.501955209 | 0.331183164 | 4.535119446 | 5.76E-06    | 0.000107443 | up |
| 274 | ITGA10      | 14.52221378 | 1.49661752  | 0.466863726 | 3.205683881 | 0.001347419 | 0.01041169  | up |
| 275 | FAM129A     | 217.6721468 | 1.490821866 | 0.334841778 | 4.452317378 | 8.49E-06    | 0.000149622 | up |
| 276 | AQP3        | 54.71162314 | 1.487592519 | 0.403327103 | 3.688302892 | 0.000225755 | 0.002432793 | up |
| 277 | CAVIN2      | 83.1372098  | 1.477439557 | 0.41153097  | 3.5901054   | 0.000330544 | 0.003341049 | up |
| 278 | TNFSF9      | 14.95970698 | 1.475540444 | 0.436716303 | 3.378716192 | 0.000728251 | 0.006419017 | up |
| 279 | OSCAR       | 22.8037065  | 1.471985131 | 0.439080094 | 3.352429659 | 0.000801056 | 0.006942815 | up |
| 280 | LHX6        | 11.10960313 | 1.47151696  | 0.474363714 | 3.102085837 | 0.001921622 | 0.013849965 | up |
| 281 | FERMT1      | 393.2136986 | 1.469254866 | 0.237368659 | 6.189759303 | 6.03E-10    | 3.28E-08    | up |
| 282 | GBP3        | 58.94666663 | 1.467625447 | 0.23743623  | 6.18113523  | 6.36E-10    | 3.45E-08    | up |
| 283 | LMCD1       | 2242.757503 | 1.465674634 | 0.264421594 | 5.542946072 | 2.97E-08    | 1.10E-06    | up |
| 284 | AC145676.1  | 24.06639808 | 1.463072678 | 0.388683155 | 3.764178244 | 0.000167098 | 0.001880749 | up |
| 285 | COL24A1     | 68.38348187 | 1.460525757 | 0.439441676 | 3.323594087 | 0.000888654 | 0.007535982 | up |
| 286 | PLPP2       | 11.49268261 | 1.456379196 | 0.500920014 | 2.907408676 | 0.003644367 | 0.022933896 | up |
| 287 | TGFBI       | 7732.325635 | 1.454016182 | 0.238385029 | 6.099444187 | 1.06E-09    | 5.47E-08    | up |
| 288 | PDP1        | 9863.783867 | 1.453173323 | 0.222045708 | 6.544478334 | 5.97E-11    | 4.08E-09    | up |
| 289 | CPM         | 186.2119511 | 1.45025337  | 0.200553301 | 7.231261543 | 4.79E-13    | 5.00E-11    | up |
| 290 | RUNDC3A-AS1 | 8.926480552 | 1.448372748 | 0.531544924 | 2.724836007 | 0.006433343 | 0.035926852 | up |
| 291 | MGLL        | 32.15345335 | 1.445747789 | 0.370611013 | 3.900984423 | 9.58E-05    | 0.00118796  | up |
| 292 | EPS8L1      | 28.28787219 | 1.44327121  | 0.346593489 | 4.164161351 | 3.12E-05    | 0.000461741 | up |

Protect against lipid-induced htNSC senescence in ACP

|     |            |             |             |             |             |             |             |    |
|-----|------------|-------------|-------------|-------------|-------------|-------------|-------------|----|
| 293 | BCAR3      | 529.5699983 | 1.440727788 | 0.131318633 | 10.97123659 | 5.25E-28    | 7.64E-25    | up |
| 294 | PLA2R1     | 14.55204934 | 1.439224293 | 0.403267362 | 3.568908446 | 0.000358472 | 0.00356041  | up |
| 295 | VAV3       | 349.2177788 | 1.436314531 | 0.482091151 | 2.97934224  | 0.002888679 | 0.019164679 | up |
| 296 | SPOCK1     | 1391.82144  | 1.436065977 | 0.23440147  | 6.126522924 | 8.98E-10    | 4.70E-08    | up |
| 297 | GIPR       | 10.99885234 | 1.435708272 | 0.486922363 | 2.948536319 | 0.003192826 | 0.020769692 | up |
| 298 | AC096921.2 | 6.671018495 | 1.430125857 | 0.536833159 | 2.664004324 | 0.007721657 | 0.041254437 | up |
| 299 | TMEM92     | 8.761829361 | 1.429109769 | 0.458933717 | 3.113978592 | 0.001845829 | 0.013408106 | up |
| 300 | TUBA4A     | 44.79004711 | 1.42806479  | 0.359295359 | 3.974626319 | 7.05E-05    | 0.000915334 | up |
| 301 | TPST2      | 577.6910854 | 1.426691555 | 0.418096235 | 3.412352074 | 0.000644049 | 0.005801778 | up |
| 302 | LCPI       | 16.2900393  | 1.42550199  | 0.407860238 | 3.495074679 | 0.000473929 | 0.00450288  | up |
| 303 | TMEFF2     | 114.8928382 | 1.419919051 | 0.351432329 | 4.040376867 | 5.34E-05    | 0.000725017 | up |
| 304 | HES7       | 25.66572348 | 1.418371096 | 0.385251914 | 3.681671766 | 0.00023171  | 0.00248569  | up |
| 305 | SPON1      | 11.77212946 | 1.417707856 | 0.433091975 | 3.273456764 | 0.001062406 | 0.008628503 | up |
| 306 | DOCK2      | 60.80967695 | 1.405856653 | 0.30837548  | 4.558911932 | 5.14E-06    | 9.80E-05    | up |
| 307 | ELL2       | 1167.505786 | 1.405428571 | 0.125075916 | 11.2366043  | 2.70E-29    | 4.22E-26    | up |
| 308 | LURAP1L    | 11.19657239 | 1.39739678  | 0.440494504 | 3.172336471 | 0.001512177 | 0.011420414 | up |
| 309 | TMEM45A    | 142.1951581 | 1.395744429 | 0.212568793 | 6.566083432 | 5.17E-11    | 3.58E-09    | up |
| 310 | ACSM3      | 14.22887966 | 1.394533453 | 0.380617251 | 3.663873484 | 0.00024843  | 0.002642776 | up |
| 311 | FBXL21     | 26.29401572 | 1.393947909 | 0.422066406 | 3.302674391 | 0.000957675 | 0.007992619 | up |
| 312 | GLI1       | 49.8171995  | 1.388002114 | 0.480727664 | 2.887294027 | 0.003885709 | 0.024135731 | up |
| 313 | PROCR      | 45.65119077 | 1.382943707 | 0.27768145  | 4.980324418 | 6.35E-07    | 1.59E-05    | up |
| 314 | SQOR       | 22.00780052 | 1.378121689 | 0.438708406 | 3.141315895 | 0.001681905 | 0.012448299 | up |
| 315 | TUFT1      | 477.8530126 | 1.376754937 | 0.253635829 | 5.428077505 | 5.70E-08    | 1.94E-06    | up |
| 316 | TIPARP     | 970.8667292 | 1.376105885 | 0.119282965 | 11.53648292 | 8.64E-31    | 1.76E-27    | up |
| 317 | VEGFC      | 186.0069372 | 1.373586539 | 0.261822153 | 5.246257903 | 1.55E-07    | 4.64E-06    | up |

Protect against lipid-induced htNSC senescence in ACP

|     |            |             |             |             |             |             |             |    |
|-----|------------|-------------|-------------|-------------|-------------|-------------|-------------|----|
| 318 | RFLNA      | 88.43244029 | 1.366967241 | 0.360106639 | 3.796006778 | 0.000147045 | 0.001690272 | up |
| 319 | ADA        | 599.5929818 | 1.365978353 | 0.242852309 | 5.6247287   | 1.86E-08    | 7.21E-07    | up |
| 320 | ST8SIA4    | 452.9620666 | 1.365143299 | 0.208007444 | 6.562954058 | 5.28E-11    | 3.63E-09    | up |
| 321 | TRIM38     | 15.77705653 | 1.363645235 | 0.432878169 | 3.150182503 | 0.001631685 | 0.012133944 | up |
| 322 | CYP27C1    | 40.98293017 | 1.35939399  | 0.22150011  | 6.13721588  | 8.40E-10    | 4.44E-08    | up |
| 323 | ITGA2B     | 9.00938863  | 1.357647882 | 0.484103784 | 2.804456246 | 0.005040153 | 0.029625448 | up |
| 324 | LINC01173  | 18.6405333  | 1.356844954 | 0.439207169 | 3.089305113 | 0.002006253 | 0.014307786 | up |
| 325 | ENPP1      | 155.622443  | 1.356550198 | 0.2165951   | 6.263069652 | 3.77E-10    | 2.16E-08    | up |
| 326 | GADD45B    | 333.0207924 | 1.350959166 | 0.225769303 | 5.983803603 | 2.18E-09    | 1.03E-07    | up |
| 327 | ECM1       | 147.8989133 | 1.350907578 | 0.220233064 | 6.133990764 | 8.57E-10    | 4.52E-08    | up |
| 328 | ATP13A2    | 2137.284698 | 1.350116703 | 0.213347499 | 6.328251843 | 2.48E-10    | 1.49E-08    | up |
| 329 | KRT81      | 16.86436152 | 1.34870127  | 0.374023414 | 3.605927381 | 0.00031104  | 0.003176072 | up |
| 330 | C13orf46   | 28.54304626 | 1.346184478 | 0.354934188 | 3.792772079 | 0.000148975 | 0.001706965 | up |
| 331 | CASP4      | 15.75245002 | 1.341439819 | 0.406876512 | 3.296921248 | 0.000977509 | 0.008100554 | up |
| 332 | IL4R       | 263.0950657 | 1.338022994 | 0.285405898 | 4.688140652 | 2.76E-06    | 5.74E-05    | up |
| 333 | SLC12A8    | 104.4592067 | 1.33540983  | 0.417586636 | 3.19792281  | 0.001384213 | 0.010647513 | up |
| 334 | DPP4       | 30.07590845 | 1.333702192 | 0.403192216 | 3.307856991 | 0.000940128 | 0.007870866 | up |
| 335 | PDPN       | 5854.450211 | 1.329910905 | 0.356423196 | 3.731269234 | 0.000190517 | 0.002103648 | up |
| 336 | ATP2A3     | 21.79225409 | 1.325890798 | 0.308877104 | 4.292615998 | 1.77E-05    | 0.000281988 | up |
| 337 | SMN1       | 557.7961698 | 1.32566913  | 0.445543377 | 2.975398579 | 0.002926081 | 0.019329013 | up |
| 338 | LINC00475  | 20.30222729 | 1.325033413 | 0.406666718 | 3.258278472 | 0.001120904 | 0.009006597 | up |
| 339 | CDYL2      | 89.49954704 | 1.323772239 | 0.21134158  | 6.263662067 | 3.76E-10    | 2.16E-08    | up |
| 340 | NID1       | 421.5418707 | 1.321085596 | 0.479973989 | 2.75241081  | 0.005915826 | 0.033725519 | up |
| 341 | TESMIN     | 15.23761496 | 1.320012997 | 0.502588254 | 2.626430256 | 0.008628567 | 0.04519842  | up |
| 342 | AC022613.1 | 24.03253376 | 1.319075251 | 0.41844256  | 3.152344855 | 0.001619649 | 0.012074187 | up |

Protect against lipid-induced htNSC senescence in ACP

|     |             |             |             |             |             |             |             |    |
|-----|-------------|-------------|-------------|-------------|-------------|-------------|-------------|----|
| 343 | SPINT2      | 9.143568334 | 1.311187081 | 0.501750158 | 2.613227045 | 0.00896917  | 0.046551431 | up |
| 344 | FOXD1       | 137.8412714 | 1.309902916 | 0.243201071 | 5.386090252 | 7.20E-08    | 2.39E-06    | up |
| 345 | AC124067.2  | 80.99476078 | 1.309243814 | 0.28793999  | 4.546932903 | 5.44E-06    | 0.000102527 | up |
| 346 | ADAM19      | 6034.293505 | 1.30681451  | 0.137916289 | 9.475418133 | 2.66E-21    | 1.18E-18    | up |
| 347 | WNT5B       | 111.4425377 | 1.302712262 | 0.290912538 | 4.478020346 | 7.53E-06    | 0.00013539  | up |
| 348 | ANXA3       | 33.5878798  | 1.301294811 | 0.443795533 | 2.932194475 | 0.003365759 | 0.021632014 | up |
| 349 | EIF2AK3     | 672.3704968 | 1.299451419 | 0.446814359 | 2.908257968 | 0.003634484 | 0.02290366  | up |
| 350 | PSMB8-AS1   | 11.04833482 | 1.296646446 | 0.458416037 | 2.828536399 | 0.004676138 | 0.027945657 | up |
| 351 | ADIRF-AS1   | 10.53355227 | 1.292749002 | 0.461155904 | 2.803279739 | 0.005058577 | 0.029664175 | up |
| 352 | PRR5L       | 441.6105437 | 1.290186485 | 0.283703785 | 4.547653411 | 5.42E-06    | 0.000102366 | up |
| 353 | IER3        | 1097.577456 | 1.289400209 | 0.280492142 | 4.596920964 | 4.29E-06    | 8.39E-05    | up |
| 354 | ADAMTSL4    | 244.6206504 | 1.288275417 | 0.328472394 | 3.922020356 | 8.78E-05    | 0.001105684 | up |
| 355 | SNAI1       | 382.1435807 | 1.286555639 | 0.416609823 | 3.088154833 | 0.002014035 | 0.014343396 | up |
| 356 | RASL11A     | 16.06979531 | 1.286439873 | 0.374387428 | 3.436119313 | 0.000590111 | 0.005392841 | up |
| 357 | CSMD2       | 161.3011194 | 1.285760617 | 0.475202916 | 2.705708601 | 0.006815883 | 0.037581463 | up |
| 358 | CREB3L1     | 116.5974878 | 1.284261562 | 0.309781933 | 4.145695482 | 3.39E-05    | 0.000494833 | up |
| 359 | MYLK        | 3560.617725 | 1.283405751 | 0.19448098  | 6.599132479 | 4.14E-11    | 2.93E-09    | up |
| 360 | INKA1       | 27.01970119 | 1.281580475 | 0.268279395 | 4.777036544 | 1.78E-06    | 3.95E-05    | up |
| 361 | GABRG3      | 22.47602066 | 1.275376149 | 0.43542343  | 2.929048049 | 0.003400019 | 0.021769742 | up |
| 362 | RPS10P7     | 10.00233091 | 1.274652605 | 0.491516377 | 2.593306476 | 0.009505802 | 0.048740276 | up |
| 363 | SRPX        | 3208.220628 | 1.270399383 | 0.208152322 | 6.103219841 | 1.04E-09    | 5.36E-08    | up |
| 364 | RAC2        | 38.93250029 | 1.26885515  | 0.461812023 | 2.747557636 | 0.006004096 | 0.034090739 | up |
| 365 | KIF21B      | 58.10560444 | 1.264360358 | 0.206200426 | 6.131705841 | 8.69E-10    | 4.56E-08    | up |
| 366 | MLPH        | 67.08973138 | 1.262625173 | 0.233978422 | 5.396331693 | 6.80E-08    | 2.27E-06    | up |
| 367 | CYP11B1-AS1 | 59.86507972 | 1.262128488 | 0.331400332 | 3.808470805 | 0.000139829 | 0.00162133  | up |

Protect against lipid-induced htNSC senescence in ACP

|     |            |             |             |             |             |             |             |    |
|-----|------------|-------------|-------------|-------------|-------------|-------------|-------------|----|
| 368 | G0S2       | 53.86939889 | 1.258750274 | 0.253374511 | 4.967943573 | 6.77E-07    | 1.68E-05    | up |
| 369 | GPAT3      | 691.7164313 | 1.25655343  | 0.259009754 | 4.85137495  | 1.23E-06    | 2.85E-05    | up |
| 370 | CERKL      | 332.4068964 | 1.25587597  | 0.421688886 | 2.978205049 | 0.002899419 | 0.019217148 | up |
| 371 | LSP1       | 65.7422431  | 1.252969695 | 0.224376016 | 5.584240763 | 2.35E-08    | 8.82E-07    | up |
| 372 | NTM        | 555.2957448 | 1.252527971 | 0.317620151 | 3.94347766  | 8.03E-05    | 0.001025324 | up |
| 373 | KLF9       | 1388.087635 | 1.247696228 | 0.289910765 | 4.303725074 | 1.68E-05    | 0.000270327 | up |
| 374 | AL021392.1 | 32.34141036 | 1.246380771 | 0.377439403 | 3.302200989 | 0.000959293 | 0.007992619 | up |
| 375 | IL18       | 28.69751598 | 1.243352193 | 0.36148145  | 3.439601657 | 0.000582571 | 0.00533591  | up |
| 376 | PCOLCE2    | 49.06791653 | 1.242227358 | 0.410590998 | 3.025461742 | 0.002482538 | 0.016916653 | up |
| 377 | SH2D6      | 12.6235607  | 1.233885772 | 0.457960736 | 2.694304721 | 0.007053565 | 0.038494429 | up |
| 378 | RAB3IL1    | 25.46829142 | 1.233175867 | 0.391143238 | 3.152747506 | 0.001617416 | 0.012063083 | up |
| 379 | STEAP1     | 77.23867398 | 1.231936826 | 0.170148986 | 7.240341851 | 4.48E-13    | 4.70E-11    | up |
| 380 | PPP1R14A   | 24.42806037 | 1.23113683  | 0.374437794 | 3.287960907 | 0.001009159 | 0.008298658 | up |
| 381 | NOX4       | 149.0875245 | 1.228131459 | 0.22690864  | 5.412449065 | 6.22E-08    | 2.10E-06    | up |
| 382 | CD109      | 1319.730123 | 1.227281558 | 0.123104651 | 9.969416649 | 2.07E-23    | 1.41E-20    | up |
| 383 | TFAP2C     | 193.0284342 | 1.226749883 | 0.203732954 | 6.021362084 | 1.73E-09    | 8.25E-08    | up |
| 384 | ARL4C      | 2492.368058 | 1.222289614 | 0.280516115 | 4.357288407 | 1.32E-05    | 0.000220676 | up |
| 385 | PARVB      | 28.39100372 | 1.217482315 | 0.271957055 | 4.476744731 | 7.58E-06    | 0.000135841 | up |
| 386 | PSD4       | 33.78076342 | 1.216777086 | 0.340495937 | 3.573543626 | 0.000352183 | 0.003512849 | up |
| 387 | BX255923.1 | 11.8186907  | 1.214361149 | 0.429033246 | 2.830459316 | 0.004648122 | 0.027798795 | up |
| 388 | NUS1P1     | 59.43295862 | 1.210440733 | 0.302834732 | 3.997034038 | 6.41E-05    | 0.000844986 | up |
| 389 | SSH1       | 2522.045732 | 1.210107225 | 0.187840676 | 6.442200111 | 1.18E-10    | 7.52E-09    | up |
| 390 | PCK2       | 224.6383233 | 1.202305947 | 0.296655852 | 4.052864415 | 5.06E-05    | 0.000695109 | up |
| 391 | AL139393.2 | 494.6592488 | 1.201979397 | 0.30533565  | 3.936583876 | 8.26E-05    | 0.001050457 | up |
| 392 | MSC-AS1    | 227.4117142 | 1.200363138 | 0.276633865 | 4.339176405 | 1.43E-05    | 0.000236554 | up |



Protect against lipid-induced htNSC senescence in ACP

|     |          |             |             |             |             |             |             |    |
|-----|----------|-------------|-------------|-------------|-------------|-------------|-------------|----|
| 393 | JUNB     | 1666.040149 | 1.198403437 | 0.282808647 | 4.237506347 | 2.26E-05    | 0.000349159 | up |
| 394 | USP43    | 35.51214166 | 1.198222608 | 0.273002148 | 4.389059265 | 1.14E-05    | 0.00019284  | up |
| 395 | NBL1     | 368.4535852 | 1.196979356 | 0.408815223 | 2.927922661 | 0.003412349 | 0.021832391 | up |
| 396 | NTNG1    | 40.78098101 | 1.193584012 | 0.400954008 | 2.976860161 | 0.002912168 | 0.01926402  | up |
| 397 | NRIP3    | 70.00038608 | 1.191964735 | 0.183267029 | 6.503978075 | 7.82E-11    | 5.22E-09    | up |
| 398 | EIF2AK4  | 3967.432445 | 1.190804981 | 0.241970052 | 4.921290766 | 8.60E-07    | 2.09E-05    | up |
| 399 | LYPD6B   | 13.97000561 | 1.188928282 | 0.421229198 | 2.822521058 | 0.004764769 | 0.028333957 | up |
| 400 | VIPR1    | 21.21225579 | 1.1809272   | 0.323923957 | 3.645692682 | 0.000266673 | 0.002794503 | up |
| 401 | ADGRG6   | 89.13281315 | 1.178393461 | 0.359179073 | 3.280796541 | 0.001035144 | 0.008447521 | up |
| 402 | DDIT3    | 194.4589014 | 1.177657624 | 0.337877142 | 3.485461063 | 0.00049129  | 0.00463968  | up |
| 403 | CAMK2N1  | 616.4209296 | 1.172893905 | 0.444394892 | 2.63930555  | 0.008307607 | 0.043867007 | up |
| 404 | SIK1B    | 58.22690924 | 1.170974787 | 0.234101294 | 5.002000494 | 5.67E-07    | 1.44E-05    | up |
| 405 | PICART1  | 16.93908903 | 1.170201712 | 0.359935248 | 3.251145084 | 0.001149412 | 0.009174118 | up |
| 406 | LMO7     | 198.2974948 | 1.169607207 | 0.142520398 | 8.206595129 | 2.28E-16    | 4.41E-14    | up |
| 407 | PROSER2  | 72.86715598 | 1.168050384 | 0.201325414 | 5.80180296  | 6.56E-09    | 2.81E-07    | up |
| 408 | HLA-B    | 723.8851105 | 1.166841375 | 0.277784854 | 4.200521951 | 2.66E-05    | 0.000402236 | up |
| 409 | TMEM154  | 33.53740995 | 1.165531884 | 0.376084364 | 3.099123487 | 0.001940941 | 0.013954626 | up |
| 410 | L3MBTL4  | 14.68843286 | 1.164894618 | 0.362506352 | 3.213446083 | 0.001311524 | 0.010175172 | up |
| 411 | ADAMTS6  | 123.3814142 | 1.164499909 | 0.224009317 | 5.198444086 | 2.01E-07    | 5.80E-06    | up |
| 412 | HSPD1P11 | 57.78362092 | 1.157532594 | 0.35983883  | 3.21680846  | 0.001296251 | 0.0100852   | up |
| 413 | THEMIS2  | 45.30093229 | 1.156776005 | 0.371805418 | 3.111240312 | 0.001863033 | 0.013499362 | up |
| 414 | GAB3     | 17.60806234 | 1.151800307 | 0.444692181 | 2.590106948 | 0.009594612 | 0.049084395 | up |
| 415 | H2AFX    | 6344.342117 | 1.149624126 | 0.420159217 | 2.736163053 | 0.006216022 | 0.034985284 | up |
| 416 | HLA-H    | 18.54722681 | 1.148809357 | 0.380623154 | 3.018232982 | 0.002542534 | 0.017233197 | up |
| 417 | HERC5    | 12.77298583 | 1.147266146 | 0.395539302 | 2.900511129 | 0.003725546 | 0.023318735 | up |

Protect against lipid-induced htNSC senescence in ACP

|     |           |             |             |             |             |             |             |    |
|-----|-----------|-------------|-------------|-------------|-------------|-------------|-------------|----|
| 418 | NET1      | 1245.258727 | 1.145271452 | 0.191733204 | 5.973255705 | 2.33E-09    | 1.09E-07    | up |
| 419 | ITGA4     | 1685.021918 | 1.144371489 | 0.283256952 | 4.040047318 | 5.34E-05    | 0.0007254   | up |
| 420 | TMCO4     | 34.37886127 | 1.141797789 | 0.336870225 | 3.389429239 | 0.000700383 | 0.006232734 | up |
| 421 | SLC22A4   | 33.32033613 | 1.141647511 | 0.34616752  | 3.297962528 | 0.000973891 | 0.008077149 | up |
| 422 | RNF152    | 43.18055979 | 1.136795335 | 0.214735948 | 5.293921891 | 1.20E-07    | 3.68E-06    | up |
| 423 | TGFB2-AS1 | 30.52704183 | 1.135924287 | 0.321175553 | 3.536770705 | 0.000405051 | 0.00394794  | up |
| 424 | SIPA1     | 392.6961014 | 1.133646665 | 0.157989664 | 7.175448305 | 7.21E-13    | 7.02E-11    | up |
| 425 | VAT1L     | 1218.785336 | 1.133009042 | 0.185438203 | 6.109900898 | 9.97E-10    | 5.19E-08    | up |
| 426 | SOCS2-AS1 | 96.29408659 | 1.131453266 | 0.392038341 | 2.88607809  | 0.003900754 | 0.024207023 | up |
| 427 | PLIN2     | 449.0564246 | 1.130625892 | 0.174123313 | 6.493248232 | 8.40E-11    | 5.57E-09    | up |
| 428 | LTBP2     | 871.9267854 | 1.129763659 | 0.25984649  | 4.347811897 | 1.38E-05    | 0.000229358 | up |
| 429 | LINC01234 | 11.31052526 | 1.12861257  | 0.398522596 | 2.831991411 | 0.004625909 | 0.027694247 | up |
| 430 | PALM2     | 64.82867902 | 1.127465865 | 0.239726586 | 4.703132368 | 2.56E-06    | 5.41E-05    | up |
| 431 | AHNAK2    | 3225.411288 | 1.126546095 | 0.209528881 | 5.376567142 | 7.59E-08    | 2.51E-06    | up |
| 432 | CADPS     | 149.278141  | 1.124959658 | 0.311011031 | 3.617105329 | 0.000297916 | 0.003062024 | up |
| 433 | ACSL1     | 19.75962993 | 1.121247337 | 0.382218546 | 2.933524154 | 0.003351376 | 0.021559988 | up |
| 434 | ADAM8     | 65.66261444 | 1.120736555 | 0.423759384 | 2.644747461 | 0.008175191 | 0.043268795 | up |
| 435 | OSTF1     | 95.54762872 | 1.118762134 | 0.20732317  | 5.396223378 | 6.81E-08    | 2.27E-06    | up |
| 436 | PORCN     | 456.3788764 | 1.11686614  | 0.140561472 | 7.945748755 | 1.93E-15    | 3.25E-13    | up |
| 437 | NFKBIZ    | 173.7801741 | 1.115103927 | 0.249332147 | 4.472363236 | 7.74E-06    | 0.000137927 | up |
| 438 | PMAIP1    | 713.4110593 | 1.110416041 | 0.212298493 | 5.230447129 | 1.69E-07    | 5.03E-06    | up |
| 439 | MYOF      | 4884.413723 | 1.107817888 | 0.126076046 | 8.786902185 | 1.54E-18    | 4.23E-16    | up |
| 440 | OLIG2     | 15.97567665 | 1.107494355 | 0.337509486 | 3.281372532 | 0.001033032 | 0.008440436 | up |
| 441 | EVI2A     | 77.26098348 | 1.102447268 | 0.189734633 | 5.810469346 | 6.23E-09    | 2.68E-07    | up |
| 442 | STEAP3    | 1765.585673 | 1.10198799  | 0.29556084  | 3.728464134 | 0.00019265  | 0.002123743 | up |

Protect against lipid-induced htNSC senescence in ACP

|     |            |             |             |             |             |             |             |    |
|-----|------------|-------------|-------------|-------------|-------------|-------------|-------------|----|
| 443 | RHEBL1     | 15.98512902 | 1.101405391 | 0.379440687 | 2.902707665 | 0.003699518 | 0.023212907 | up |
| 444 | SERINC5    | 105.4283501 | 1.100038178 | 0.195088942 | 5.638649571 | 1.71E-08    | 6.79E-07    | up |
| 445 | AMPD3      | 16.22743634 | 1.099869902 | 0.369146349 | 2.979495541 | 0.002887234 | 0.019161336 | up |
| 446 | ZFPM2      | 122.7937792 | 1.099761119 | 0.210837543 | 5.216154136 | 1.83E-07    | 5.36E-06    | up |
| 447 | TES        | 779.4642206 | 1.095682939 | 0.123291098 | 8.886959018 | 6.28E-19    | 2.00E-16    | up |
| 448 | PTPRH      | 41.64282789 | 1.094204836 | 0.417819988 | 2.618842726 | 0.008822861 | 0.046031932 | up |
| 449 | SLC43A3    | 29.24229685 | 1.092743229 | 0.28782709  | 3.796526685 | 0.000146738 | 0.001688934 | up |
| 450 | BMF        | 1104.159581 | 1.091037226 | 0.370612306 | 2.943877489 | 0.003241283 | 0.021004379 | up |
| 451 | KREMEN2    | 17.53843705 | 1.090514345 | 0.304795148 | 3.57785992  | 0.000346419 | 0.003470141 | up |
| 452 | PTHLH      | 188.2567674 | 1.090273248 | 0.193568755 | 5.632485723 | 1.78E-08    | 6.98E-07    | up |
| 453 | PDZD7      | 47.94088233 | 1.089571674 | 0.28252534  | 3.856544948 | 0.000115001 | 0.001378184 | up |
| 454 | ADAMTSL1   | 268.6486713 | 1.089367185 | 0.260816241 | 4.176761308 | 2.96E-05    | 0.000440419 | up |
| 455 | MMP19      | 83.44065637 | 1.088417291 | 0.337210109 | 3.227712519 | 0.001247843 | 0.009798432 | up |
| 456 | HMGA2      | 378.3523751 | 1.087758085 | 0.173225067 | 6.279449641 | 3.40E-10    | 1.96E-08    | up |
| 457 | AC244153.1 | 12.02675158 | 1.084425012 | 0.414074219 | 2.618914589 | 0.008821003 | 0.046031932 | up |
| 458 | HAPLN3     | 62.28519305 | 1.08404297  | 0.313968504 | 3.452712474 | 0.00055498  | 0.005117732 | up |
| 459 | DRP2       | 17.42169021 | 1.083299234 | 0.314502295 | 3.44448753  | 0.000572143 | 0.005252211 | up |
| 460 | SMAGP      | 138.4363423 | 1.083122276 | 0.17960423  | 6.030605589 | 1.63E-09    | 7.92E-08    | up |
| 461 | SERPINB1   | 59.47734422 | 1.081474295 | 0.233671485 | 4.628182573 | 3.69E-06    | 7.36E-05    | up |
| 462 | EFEMP1     | 119.6640544 | 1.080997495 | 0.334263866 | 3.233964551 | 0.001220846 | 0.009620243 | up |
| 463 | SLC26A2    | 1307.568473 | 1.077433677 | 0.156685477 | 6.876410596 | 6.14E-12    | 5.06E-10    | up |
| 464 | SMIM3      | 555.9673053 | 1.075697275 | 0.236413264 | 4.550071591 | 5.36E-06    | 0.000101291 | up |
| 465 | IRAK2      | 78.15641252 | 1.072830493 | 0.223635412 | 4.797229935 | 1.61E-06    | 3.62E-05    | up |
| 466 | VSIR       | 28.04698376 | 1.06885207  | 0.380422511 | 2.809644644 | 0.004959623 | 0.029236502 | up |
| 467 | PFKFB3     | 10865.6473  | 1.067734601 | 0.350705325 | 3.044534898 | 0.002330404 | 0.016062747 | up |

Protect against lipid-induced htNSC senescence in ACP

|     |          |             |             |             |             |             |             |    |
|-----|----------|-------------|-------------|-------------|-------------|-------------|-------------|----|
| 468 | SLC2A12  | 611.4175295 | 1.067541565 | 0.280514395 | 3.805656977 | 0.000141428 | 0.00163801  | up |
| 469 | FAM83H   | 62.8753129  | 1.066308364 | 0.320224712 | 3.32987532  | 0.000868849 | 0.007395749 | up |
| 470 | JAK3     | 24.99007297 | 1.062572431 | 0.40166069  | 2.645447906 | 0.008158285 | 0.043213017 | up |
| 471 | TCF7     | 24.32502568 | 1.06224743  | 0.307596727 | 3.453376892 | 0.000553615 | 0.005107455 | up |
| 472 | FAM72C   | 20.2350513  | 1.061323244 | 0.392272122 | 2.705579074 | 0.006818541 | 0.037581463 | up |
| 473 | CMPK2    | 17.06224441 | 1.058522583 | 0.404805393 | 2.614892492 | 0.008925554 | 0.046407869 | up |
| 474 | HERC6    | 34.20021844 | 1.058303258 | 0.276212135 | 3.83148719  | 0.000127371 | 0.00150255  | up |
| 475 | RASSF5   | 45.53751528 | 1.057856123 | 0.344978886 | 3.066437297 | 0.002166262 | 0.015172779 | up |
| 476 | PAPSS2   | 416.7917252 | 1.050059083 | 0.283020113 | 3.710192437 | 0.000207102 | 0.002256179 | up |
| 477 | ERRFI1   | 6379.872927 | 1.049922314 | 0.151175254 | 6.945067303 | 3.78E-12    | 3.23E-10    | up |
| 478 | SLC25A43 | 33.25711417 | 1.049131334 | 0.321645542 | 3.261762393 | 0.001107219 | 0.008935429 | up |
| 479 | HOXB5    | 20.76342874 | 1.048242653 | 0.311144761 | 3.368986998 | 0.00075445  | 0.006612722 | up |
| 480 | TYMP     | 27.10342093 | 1.047505954 | 0.347006196 | 3.01869524  | 0.002538658 | 0.017218391 | up |
| 481 | SRC      | 240.3412834 | 1.047320287 | 0.118258066 | 8.85622706  | 8.28E-19    | 2.44E-16    | up |
| 482 | P4HA2    | 412.7517326 | 1.044601947 | 0.114595373 | 9.115568259 | 7.83E-20    | 2.75E-17    | up |
| 483 | ZC3H12A  | 178.9819572 | 1.038207953 | 0.208620675 | 4.976534336 | 6.47E-07    | 1.62E-05    | up |
| 484 | EMB      | 75.05166183 | 1.034016261 | 0.251920034 | 4.104541605 | 4.05E-05    | 0.000578481 | up |
| 485 | FHOD3    | 734.1528302 | 1.031470911 | 0.202527014 | 5.093004093 | 3.52E-07    | 9.44E-06    | up |
| 486 | LLGL2    | 20.87139051 | 1.028339768 | 0.375469176 | 2.738812755 | 0.006166148 | 0.034764089 | up |
| 487 | HLA-C    | 625.3154713 | 1.026973684 | 0.218543579 | 4.699171167 | 2.61E-06    | 5.50E-05    | up |
| 488 | ITPRIP   | 460.9378532 | 1.025660324 | 0.132561583 | 7.737236551 | 1.02E-14    | 1.51E-12    | up |
| 489 | IRF1     | 206.6704655 | 1.024200403 | 0.215961483 | 4.742514214 | 2.11E-06    | 4.58E-05    | up |
| 490 | HIC1     | 1192.731912 | 1.023678984 | 0.15677776  | 6.529491064 | 6.60E-11    | 4.46E-09    | up |
| 491 | RCN3     | 223.3086092 | 1.023639869 | 0.146802415 | 6.972908915 | 3.10E-12    | 2.69E-10    | up |
| 492 | LAMC3    | 158.5581737 | 1.022374365 | 0.241824018 | 4.227761878 | 2.36E-05    | 0.000362698 | up |

Protect against lipid-induced htNSC senescence in ACP

|     |            |             |              |             |              |             |             |      |
|-----|------------|-------------|--------------|-------------|--------------|-------------|-------------|------|
| 493 | SMAD7      | 324.9545208 | 1.022234873  | 0.253007909 | 4.040327737  | 5.34E-05    | 0.000725017 | up   |
| 494 | SH3TC1     | 129.2547693 | 1.021562566  | 0.237838071 | 4.295202028  | 1.75E-05    | 0.000279159 | up   |
| 495 | INSYN2B    | 300.8056051 | 1.01913107   | 0.173039648 | 5.889581258  | 3.87E-09    | 1.72E-07    | up   |
| 496 | STX3       | 62.051645   | 1.018855069  | 0.302700228 | 3.365888016  | 0.000762977 | 0.006675965 | up   |
| 497 | PGBD5      | 443.2667937 | 1.01870145   | 0.322881613 | 3.15503085   | 0.001604811 | 0.011977846 | up   |
| 498 | ALDH1L2    | 71.5197138  | 1.018313314  | 0.255627026 | 3.983590196  | 6.79E-05    | 0.000886558 | up   |
| 499 | QPCT       | 30.6892704  | 1.016665979  | 0.258611605 | 3.931246542  | 8.45E-05    | 0.001070049 | up   |
| 500 | BCL3       | 1282.975131 | 1.006816773  | 0.264113486 | 3.812061198  | 0.000137813 | 0.001600688 | up   |
| 501 | ACP6       | 722.624668  | 1.000650058  | 0.238159111 | 4.201603105  | 2.65E-05    | 0.000400617 | up   |
| 502 | NOL4       | 11.79745194 | -1.000759675 | 0.357717779 | -2.797623524 | 0.005148008 | 0.030085702 | down |
| 503 | PROB1      | 83.0926845  | -1.003797281 | 0.196335683 | -5.112658409 | 3.18E-07    | 8.58E-06    | down |
| 504 | CDH7       | 22.34709943 | -1.005659502 | 0.301268305 | -3.338085971 | 0.000843576 | 0.00722814  | down |
| 505 | DMD        | 133.1086534 | -1.007693208 | 0.308995713 | -3.261188317 | 0.001109463 | 0.008946448 | down |
| 506 | MAPK10     | 1111.289096 | -1.008477428 | 0.145085111 | -6.950936725 | 3.63E-12    | 3.12E-10    | down |
| 507 | AC073050.1 | 14.71754908 | -1.011149865 | 0.368712141 | -2.742382887 | 0.00609952  | 0.034507452 | down |
| 508 | OSR1       | 73.01379725 | -1.011379799 | 0.221177542 | -4.572705657 | 4.81E-06    | 9.25E-05    | down |
| 509 | CAMKV      | 13.81538615 | -1.012009056 | 0.348738468 | -2.90191404  | 0.003708903 | 0.02325746  | down |
| 510 | PLCE1      | 607.7983488 | -1.014348346 | 0.206398536 | -4.914513283 | 8.90E-07    | 2.15E-05    | down |
| 511 | REEP2      | 977.1382286 | -1.01565236  | 0.145421042 | -6.984218679 | 2.86E-12    | 2.52E-10    | down |
| 512 | MFSD2A     | 181.1171841 | -1.016234636 | 0.302333499 | -3.361303457 | 0.000775755 | 0.006761625 | down |
| 513 | PTPRD      | 1623.764912 | -1.018237411 | 0.098782582 | -10.30786392 | 6.49E-25    | 5.08E-22    | down |
| 514 | DDR1       | 8151.300509 | -1.019140831 | 0.114871353 | -8.872019055 | 7.18E-19    | 2.20E-16    | down |
| 515 | FGD4       | 112.8577862 | -1.020961735 | 0.278065406 | -3.671660388 | 0.00024098  | 0.002571588 | down |
| 516 | S1PR1      | 31.96362101 | -1.024025419 | 0.363033328 | -2.820747685 | 0.004791187 | 0.028441213 | down |
| 517 | IRS2       | 2610.138545 | -1.030585264 | 0.188347848 | -5.471712429 | 4.46E-08    | 1.56E-06    | down |

Protect against lipid-induced htNSC senescence in ACP

|     |            |             |              |             |              |             |             |      |
|-----|------------|-------------|--------------|-------------|--------------|-------------|-------------|------|
| 518 | AC009041.2 | 247.6060328 | -1.036154761 | 0.234408261 | -4.420299672 | 9.86E-06    | 0.000170217 | down |
| 519 | TDRKH      | 163.8565468 | -1.038393698 | 0.22286156  | -4.659366558 | 3.17E-06    | 6.46E-05    | down |
| 520 | SERPINI1   | 64.19254944 | -1.038531174 | 0.29157655  | -3.561778804 | 0.000368351 | 0.003640771 | down |
| 521 | CDH10      | 47.78336163 | -1.039487211 | 0.269744475 | -3.853599637 | 0.000116394 | 0.0013916   | down |
| 522 | DSCAM      | 23.22975771 | -1.040259496 | 0.385594831 | -2.697804565 | 0.00697984  | 0.038172584 | down |
| 523 | MSI1       | 1259.859836 | -1.043183603 | 0.099178986 | -10.51819189 | 7.12E-26    | 6.91E-23    | down |
| 524 | MMP15      | 791.6268759 | -1.046085871 | 0.139108708 | -7.519916515 | 5.48E-14    | 6.89E-12    | down |
| 525 | LAG3       | 24.74192008 | -1.046302213 | 0.255843113 | -4.089624299 | 4.32E-05    | 0.000609662 | down |
| 526 | SLC27A6    | 35.55088159 | -1.048982497 | 0.246913112 | -4.248387167 | 2.15E-05    | 0.00033364  | down |
| 527 | SCN1A      | 427.2513689 | -1.049671098 | 0.302504766 | -3.469932434 | 0.000520589 | 0.00485113  | down |
| 528 | SLC38A3    | 124.9636367 | -1.053549869 | 0.191431677 | -5.503529423 | 3.72E-08    | 1.35E-06    | down |
| 529 | TCERG1L    | 572.889078  | -1.056445486 | 0.183286631 | -5.763898214 | 8.22E-09    | 3.48E-07    | down |
| 530 | AC064875.1 | 46.48061331 | -1.056774259 | 0.369502921 | -2.859988917 | 0.004236558 | 0.025803338 | down |
| 531 | CCDC85C    | 1306.185837 | -1.057709012 | 0.191276864 | -5.529727908 | 3.21E-08    | 1.17E-06    | down |
| 532 | CUEDC1     | 568.6276009 | -1.058005153 | 0.177727347 | -5.952967686 | 2.63E-09    | 1.21E-07    | down |
| 533 | ACKR1      | 76.4775659  | -1.059539913 | 0.211799369 | -5.002564069 | 5.66E-07    | 1.44E-05    | down |
| 534 | PDE3A      | 494.3369079 | -1.060746763 | 0.170890361 | -6.207177248 | 5.39E-10    | 2.99E-08    | down |
| 535 | CLDN20     | 14.29979721 | -1.063525775 | 0.343782036 | -3.093604852 | 0.001977407 | 0.014151837 | down |
| 536 | GNAO1      | 47.59488748 | -1.065559765 | 0.255112851 | -4.176817282 | 2.96E-05    | 0.000440419 | down |
| 537 | STON2      | 111.8007482 | -1.067607134 | 0.295062477 | -3.618240945 | 0.000296612 | 0.003051703 | down |
| 538 | SCD        | 11388.4265  | -1.073328436 | 0.291763328 | -3.678764023 | 0.000234367 | 0.00250891  | down |
| 539 | SLIT2      | 3018.773408 | -1.075894247 | 0.29084673  | -3.699179457 | 0.000216298 | 0.002345067 | down |
| 540 | CDHR3      | 18.63804293 | -1.079117146 | 0.332062975 | -3.249736431 | 0.00115512  | 0.009198045 | down |
| 541 | ATP1B1     | 104.7266035 | -1.07947674  | 0.225200672 | -4.793399285 | 1.64E-06    | 3.68E-05    | down |
| 542 | HDAC9      | 196.9799886 | -1.079491799 | 0.192787424 | -5.599389098 | 2.15E-08    | 8.19E-07    | down |



Protect against lipid-induced htNSC senescence in ACP

|     |            |             |              |             |              |             |             |      |
|-----|------------|-------------|--------------|-------------|--------------|-------------|-------------|------|
| 543 | WLS        | 4379.681042 | -1.079582478 | 0.209365586 | -5.156446664 | 2.52E-07    | 6.99E-06    | down |
| 544 | NAB2       | 1448.713298 | -1.07984565  | 0.198676826 | -5.435186739 | 5.47E-08    | 1.88E-06    | down |
| 545 | ARHGEF37   | 99.87038604 | -1.080086399 | 0.205151891 | -5.264813286 | 1.40E-07    | 4.24E-06    | down |
| 546 | AC092675.1 | 22.5774845  | -1.080737701 | 0.327282239 | -3.30215811  | 0.00095944  | 0.007992619 | down |
| 547 | INSM1      | 69.85336629 | -1.08111093  | 0.359746081 | -3.005205576 | 0.002654014 | 0.01788758  | down |
| 548 | GVQW3      | 335.8091519 | -1.081671448 | 0.153876056 | -7.029498129 | 2.07E-12    | 1.86E-10    | down |
| 549 | AL683813.1 | 46.28831904 | -1.08224016  | 0.204303745 | -5.297211566 | 1.18E-07    | 3.62E-06    | down |
| 550 | AC004492.1 | 11.77150492 | -1.082556583 | 0.368356309 | -2.938884327 | 0.00329396  | 0.021264526 | down |
| 551 | AC079416.1 | 8.358473284 | -1.083410341 | 0.413761527 | -2.618441468 | 0.008833244 | 0.046057283 | down |
| 552 | ARHGEF4    | 32.84905358 | -1.085257033 | 0.305966091 | -3.546984664 | 0.000389667 | 0.003818102 | down |
| 553 | MIR641     | 12.63893181 | -1.088158534 | 0.364402278 | -2.986146356 | 0.002825174 | 0.018810781 | down |
| 554 | MAPK8IP1   | 678.872606  | -1.090943821 | 0.122979708 | -8.870925457 | 7.25E-19    | 2.20E-16    | down |
| 555 | NOVA1      | 768.9154638 | -1.091435711 | 0.1548791   | -7.047017386 | 1.83E-12    | 1.66E-10    | down |
| 556 | CDC42EP4   | 1069.840955 | -1.096418796 | 0.270886767 | -4.047517012 | 5.18E-05    | 0.000707777 | down |
| 557 | CASC10     | 500.4916835 | -1.09865807  | 0.236823817 | -4.639136733 | 3.50E-06    | 7.03E-05    | down |
| 558 | LYNX1      | 41.49885698 | -1.101689748 | 0.327577109 | -3.36314632  | 0.000770595 | 0.006731054 | down |
| 559 | FBLN2      | 328.4966064 | -1.101700543 | 0.328882193 | -3.349833368 | 0.000808602 | 0.006991059 | down |
| 560 | C6orf201   | 10.84375665 | -1.102160732 | 0.400938414 | -2.748952689 | 0.005978602 | 0.033983893 | down |
| 561 | AL391807.1 | 91.00502225 | -1.102489626 | 0.21764924  | -5.065442103 | 4.07E-07    | 1.07E-05    | down |
| 562 | TCF7L1     | 876.1151103 | -1.103878248 | 0.140894459 | -7.834788237 | 4.70E-15    | 7.59E-13    | down |
| 563 | NRARP      | 92.42339566 | -1.104569883 | 0.302759613 | -3.648339591 | 0.000263941 | 0.002770152 | down |
| 564 | SLC47A1    | 21.83609272 | -1.105048628 | 0.401709938 | -2.750862062 | 0.005943867 | 0.033833679 | down |
| 565 | ST6GALNAC6 | 13.44914974 | -1.107177183 | 0.345724996 | -3.202479414 | 0.0013625   | 0.010508284 | down |
| 566 | AC004696.1 | 12.48228923 | -1.108321571 | 0.359219274 | -3.085362201 | 0.002033044 | 0.014438371 | down |
| 567 | GPRC5B     | 1604.596204 | -1.109650029 | 0.135167887 | -8.209420569 | 2.22E-16    | 4.35E-14    | down |

Protect against lipid-induced htNSC senescence in ACP

|     |            |             |              |             |              |             |             |      |
|-----|------------|-------------|--------------|-------------|--------------|-------------|-------------|------|
| 568 | MBOAT1     | 201.5611088 | -1.112160842 | 0.23871381  | -4.65897152  | 3.18E-06    | 6.46E-05    | down |
| 569 | SEMA3B     | 269.2874499 | -1.113551828 | 0.293355706 | -3.7959099   | 0.000147103 | 0.001690272 | down |
| 570 | HIST1H2BD  | 38.79520114 | -1.116567075 | 0.317980046 | -3.511437552 | 0.00044569  | 0.004278499 | down |
| 571 | SOX8       | 509.4543991 | -1.121789684 | 0.310386676 | -3.614168291 | 0.000301313 | 0.0030907   | down |
| 572 | AC004540.2 | 44.92601188 | -1.123963456 | 0.263008676 | -4.273484325 | 1.92E-05    | 0.000304045 | down |
| 573 | SLC25A34   | 18.92965393 | -1.125320255 | 0.270651268 | -4.157823686 | 3.21E-05    | 0.00047302  | down |
| 574 | SLC25A18   | 369.2548655 | -1.125740817 | 0.144777189 | -7.775678095 | 7.50E-15    | 1.17E-12    | down |
| 575 | AC024560.2 | 9.77605921  | -1.125986102 | 0.384178306 | -2.930894546 | 0.003379875 | 0.021695345 | down |
| 576 | BEST1      | 15.73115143 | -1.137786337 | 0.362395431 | -3.139626605 | 0.001691633 | 0.01250212  | down |
| 577 | PLCB4      | 486.3028606 | -1.138834325 | 0.200879515 | -5.669240719 | 1.43E-08    | 5.81E-07    | down |
| 578 | AC010530.1 | 9.134044998 | -1.140073501 | 0.426865113 | -2.670805054 | 0.007566958 | 0.040585978 | down |
| 579 | DHCR7      | 573.6126157 | -1.140502687 | 0.309059645 | -3.690234891 | 0.000224047 | 0.00241622  | down |
| 580 | HIST1H2AC  | 136.4398441 | -1.142234942 | 0.239624116 | -4.766777917 | 1.87E-06    | 4.13E-05    | down |
| 581 | TRIM9      | 1118.767567 | -1.14284912  | 0.163646639 | -6.983639441 | 2.88E-12    | 2.52E-10    | down |
| 582 | AGFG2      | 191.220024  | -1.143178368 | 0.211277201 | -5.410798521 | 6.27E-08    | 2.11E-06    | down |
| 583 | FDFT1      | 2324.334096 | -1.145492741 | 0.374846445 | -3.055898642 | 0.002243871 | 0.01563568  | down |
| 584 | ADGRV1     | 296.2984728 | -1.146892103 | 0.296707022 | -3.865402627 | 0.000110906 | 0.001338565 | down |
| 585 | AL109955.1 | 8.531177151 | -1.14717301  | 0.40757421  | -2.814635918 | 0.004883252 | 0.028878275 | down |
| 586 | ARHGAP26   | 118.8393963 | -1.148753366 | 0.208972273 | -5.497156864 | 3.86E-08    | 1.39E-06    | down |
| 587 | ARHGEF10L  | 409.6087372 | -1.149008962 | 0.205678785 | -5.586424301 | 2.32E-08    | 8.72E-07    | down |
| 588 | C4B        | 99.95847001 | -1.149141765 | 0.323869467 | -3.548163328 | 0.000387928 | 0.003804718 | down |
| 589 | ID3        | 7782.617611 | -1.149334896 | 0.229869798 | -4.999938681 | 5.73E-07    | 1.45E-05    | down |
| 590 | NCALD      | 594.6794177 | -1.162121787 | 0.211087409 | -5.505405512 | 3.68E-08    | 1.34E-06    | down |
| 591 | COL26A1    | 725.7511598 | -1.162470392 | 0.213527464 | -5.444125871 | 5.21E-08    | 1.80E-06    | down |
| 592 | AC007666.1 | 12.72907354 | -1.162571096 | 0.363643974 | -3.197003603 | 0.001388632 | 0.010677468 | down |

Protect against lipid-induced htNSC senescence in ACP

|     |            |             |              |             |              |             |             |      |
|-----|------------|-------------|--------------|-------------|--------------|-------------|-------------|------|
| 593 | FRRS1L     | 10.38769483 | -1.163343871 | 0.418143153 | -2.782166493 | 0.005399733 | 0.031314146 | down |
| 594 | PTPRO      | 764.2891542 | -1.164676919 | 0.391216796 | -2.977062671 | 0.002910245 | 0.019257556 | down |
| 595 | ADGRG1     | 1695.668274 | -1.166030283 | 0.25001117  | -4.663912749 | 3.10E-06    | 6.34E-05    | down |
| 596 | SNTG1      | 28.5916329  | -1.169107907 | 0.32248101  | -3.625354267 | 0.000288566 | 0.002987028 | down |
| 597 | MREG       | 347.1542995 | -1.170976389 | 0.273726821 | -4.277901534 | 1.89E-05    | 0.000299406 | down |
| 598 | CNTN4      | 30.36799812 | -1.179407858 | 0.229281554 | -5.143928237 | 2.69E-07    | 7.43E-06    | down |
| 599 | PPP1R14C   | 118.789902  | -1.180469559 | 0.340762522 | -3.464200093 | 0.000531811 | 0.004933977 | down |
| 600 | AC006978.1 | 94.52706169 | -1.18145037  | 0.184454643 | -6.405099635 | 1.50E-10    | 9.41E-09    | down |
| 601 | SPCS2P4    | 92.89913785 | -1.182167562 | 0.360388453 | -3.280259269 | 0.001037117 | 0.008456522 | down |
| 602 | AC135050.5 | 11.96343905 | -1.184269277 | 0.404496173 | -2.927763861 | 0.003414092 | 0.021832391 | down |
| 603 | LGR5       | 16.07670526 | -1.185138676 | 0.364618592 | -3.250351747 | 0.001152623 | 0.00919531  | down |
| 604 | ADGRB3     | 204.28694   | -1.1863152   | 0.208433743 | -5.691569821 | 1.26E-08    | 5.13E-07    | down |
| 605 | GAREM1     | 195.3986501 | -1.1922866   | 0.247771206 | -4.812046638 | 1.49E-06    | 3.40E-05    | down |
| 606 | RND2       | 263.0634502 | -1.193242905 | 0.192240973 | -6.207016569 | 5.40E-10    | 2.99E-08    | down |
| 607 | CPEB2      | 323.6240446 | -1.195802683 | 0.172456478 | -6.933938899 | 4.09E-12    | 3.44E-10    | down |
| 608 | AC009242.1 | 8.589034992 | -1.206731497 | 0.452251227 | -2.668276891 | 0.00762414  | 0.040840597 | down |
| 609 | LINC01422  | 8.326789784 | -1.209994084 | 0.420079482 | -2.880393205 | 0.003971795 | 0.024565527 | down |
| 610 | TMEM47     | 753.6505777 | -1.211974318 | 0.157250054 | -7.707306202 | 1.29E-14    | 1.83E-12    | down |
| 611 | IGSF5      | 6.47992264  | -1.212426791 | 0.457176847 | -2.651986424 | 0.008001976 | 0.042528904 | down |
| 612 | PLCXD2     | 66.98027868 | -1.212884689 | 0.231133048 | -5.247560654 | 1.54E-07    | 4.61E-06    | down |
| 613 | NTRK3      | 507.6121167 | -1.214342448 | 0.313703803 | -3.870984145 | 0.000108397 | 0.001315297 | down |
| 614 | AC117489.1 | 7.725870648 | -1.214833579 | 0.46208914  | -2.629002662 | 0.008563569 | 0.044938874 | down |
| 615 | EFCC1      | 27.90047344 | -1.217557752 | 0.39411398  | -3.089354385 | 0.00200592  | 0.014307786 | down |
| 616 | POM121L9P  | 19.25685698 | -1.218744358 | 0.359801793 | -3.387265934 | 0.000705929 | 0.00627017  | down |
| 617 | SNORA66    | 9.067785428 | -1.219099169 | 0.397240033 | -3.068923241 | 0.002148318 | 0.015067826 | down |

Protect against lipid-induced htNSC senescence in ACP

|     |            |             |              |             |              |             |             |      |
|-----|------------|-------------|--------------|-------------|--------------|-------------|-------------|------|
| 618 | FLRT1      | 9.489743719 | -1.220449846 | 0.426697102 | -2.8602253   | 0.004233401 | 0.025791827 | down |
| 619 | PCDH10     | 1444.358633 | -1.220997968 | 0.200271977 | -6.096699014 | 1.08E-09    | 5.55E-08    | down |
| 620 | PRR36      | 119.7263812 | -1.222727877 | 0.267963674 | -4.563035947 | 5.04E-06    | 9.63E-05    | down |
| 621 | MSMO1      | 810.2461616 | -1.223600097 | 0.443495217 | -2.758992767 | 0.005797982 | 0.03317019  | down |
| 622 | AC093915.1 | 10.48002207 | -1.224472985 | 0.382173713 | -3.203969673 | 0.001355468 | 0.010461969 | down |
| 623 | SYBU       | 461.2792189 | -1.227538687 | 0.181484584 | -6.763873051 | 1.34E-11    | 1.07E-09    | down |
| 624 | LETM2      | 50.51603038 | -1.227767674 | 0.201901892 | -6.081011225 | 1.19E-09    | 6.03E-08    | down |
| 625 | AL138921.2 | 7.365632461 | -1.227997911 | 0.458484328 | -2.678385796 | 0.007397795 | 0.039827212 | down |
| 626 | RTN1       | 109.413695  | -1.230052293 | 0.215366565 | -5.711435727 | 1.12E-08    | 4.63E-07    | down |
| 627 | AC008013.1 | 14.21578822 | -1.231223735 | 0.385680777 | -3.192338867 | 0.001411257 | 0.010814677 | down |
| 628 | RALGPS1    | 50.23284495 | -1.231897319 | 0.234449632 | -5.254422055 | 1.48E-07    | 4.46E-06    | down |
| 629 | FADS2      | 6424.554626 | -1.240256986 | 0.276962425 | -4.478069497 | 7.53E-06    | 0.00013539  | down |
| 630 | PSPC1-AS2  | 8.518140183 | -1.243161295 | 0.423586823 | -2.934844113 | 0.003337153 | 0.021488859 | down |
| 631 | SLITRK2    | 54.48947575 | -1.24468504  | 0.304891942 | -4.082380895 | 4.46E-05    | 0.000626813 | down |
| 632 | MMEL1      | 9.152683541 | -1.249264687 | 0.457144692 | -2.732755534 | 0.006280693 | 0.035258117 | down |
| 633 | NKAIN3     | 61.32008512 | -1.254414096 | 0.212410366 | -5.905616195 | 3.51E-09    | 1.59E-07    | down |
| 634 | ITGB8      | 2430.627966 | -1.259648591 | 0.199653935 | -6.309159859 | 2.81E-10    | 1.67E-08    | down |
| 635 | C6orf118   | 16.10477496 | -1.260638167 | 0.425005432 | -2.966169544 | 0.003015342 | 0.019817747 | down |
| 636 | AL589987.1 | 13.20265028 | -1.261293736 | 0.446939378 | -2.822068939 | 0.004771492 | 0.028360813 | down |
| 637 | TMEM158    | 1232.814635 | -1.261533264 | 0.274242999 | -4.600056406 | 4.22E-06    | 8.31E-05    | down |
| 638 | P2RY1      | 103.4423729 | -1.265540522 | 0.245262482 | -5.159943378 | 2.47E-07    | 6.90E-06    | down |
| 639 | CRB1       | 30.19459775 | -1.268360845 | 0.325480634 | -3.896885756 | 9.74E-05    | 0.001203839 | down |
| 640 | CES3       | 40.39103341 | -1.268799121 | 0.255390067 | -4.968083286 | 6.76E-07    | 1.68E-05    | down |
| 641 | HHIPL1     | 35.20224142 | -1.271636892 | 0.373959621 | -3.400465777 | 0.000672712 | 0.006018049 | down |
| 642 | PCDHGC3    | 5543.183929 | -1.275230743 | 0.226445423 | -5.631514776 | 1.79E-08    | 6.98E-07    | down |

Protect against lipid-induced htNSC senescence in ACP

|     |            |             |              |             |              |             |             |      |
|-----|------------|-------------|--------------|-------------|--------------|-------------|-------------|------|
| 643 | AC144831.1 | 12.89176906 | -1.275556173 | 0.353023722 | -3.613230767 | 0.000302405 | 0.00309878  | down |
| 644 | AC020905.1 | 26.43222267 | -1.279036732 | 0.312600499 | -4.091601691 | 4.28E-05    | 0.000605745 | down |
| 645 | MAP2       | 2693.251786 | -1.280702019 | 0.214873229 | -5.960267942 | 2.52E-09    | 1.17E-07    | down |
| 646 | CXCL16     | 121.5109783 | -1.287968545 | 0.208844855 | -6.167106891 | 6.96E-10    | 3.72E-08    | down |
| 647 | TAGLN3     | 167.6896213 | -1.288482918 | 0.257986594 | -4.994379345 | 5.90E-07    | 1.49E-05    | down |
| 648 | PCDHGC4    | 107.512212  | -1.289459543 | 0.277024577 | -4.654675611 | 3.24E-06    | 6.58E-05    | down |
| 649 | KCNA2      | 100.181191  | -1.292032574 | 0.279451466 | -4.623459633 | 3.77E-06    | 7.50E-05    | down |
| 650 | MACROD2    | 69.27270661 | -1.299928062 | 0.244701524 | -5.312300633 | 1.08E-07    | 3.38E-06    | down |
| 651 | ENC1       | 6744.686564 | -1.301624436 | 0.20792237  | -6.260146193 | 3.85E-10    | 2.20E-08    | down |
| 652 | ZNRF2      | 347.075493  | -1.313517986 | 0.187620418 | -7.000933041 | 2.54E-12    | 2.25E-10    | down |
| 653 | SLC13A3    | 32.23985776 | -1.313641958 | 0.2449567   | -5.362751687 | 8.20E-08    | 2.67E-06    | down |
| 654 | SKIDA1     | 202.1546936 | -1.314285379 | 0.231935273 | -5.666604138 | 1.46E-08    | 5.87E-07    | down |
| 655 | AL022315.1 | 8.258167654 | -1.314425021 | 0.427946612 | -3.071469631 | 0.002130078 | 0.014945046 | down |
| 656 | C2orf70    | 8.904631119 | -1.315124931 | 0.42535729  | -3.091812367 | 0.001989386 | 0.01422257  | down |
| 657 | KCNIP1     | 567.2756592 | -1.316873403 | 0.258919891 | -5.086026399 | 3.66E-07    | 9.76E-06    | down |
| 658 | MT1F       | 16.57196004 | -1.321105262 | 0.509656415 | -2.592148793 | 0.009537851 | 0.048843105 | down |
| 659 | NDRG2      | 141.3746887 | -1.321209783 | 0.287910053 | -4.588967178 | 4.45E-06    | 8.66E-05    | down |
| 660 | AC092111.1 | 13.78841342 | -1.322601622 | 0.349009559 | -3.789585667 | 0.000150899 | 0.001727066 | down |
| 661 | AC092958.1 | 13.10498585 | -1.324331341 | 0.332150594 | -3.987141276 | 6.69E-05    | 0.000875081 | down |
| 662 | EPPK1      | 8.849566574 | -1.325560096 | 0.502092146 | -2.640073355 | 0.008288808 | 0.043790459 | down |
| 663 | AC091181.1 | 6.11575833  | -1.327028681 | 0.509743639 | -2.603325631 | 0.009232422 | 0.047638454 | down |
| 664 | THSD7A     | 190.4650547 | -1.327089985 | 0.257349219 | -5.156767103 | 2.51E-07    | 6.99E-06    | down |
| 665 | FOS        | 245.0843318 | -1.329469839 | 0.34084772  | -3.90048037  | 9.60E-05    | 0.001189712 | down |
| 666 | FAIM2      | 205.7640312 | -1.330274592 | 0.17041876  | -7.805916369 | 5.91E-15    | 9.40E-13    | down |
| 667 | ITGB4      | 3054.561952 | -1.341518031 | 0.271772743 | -4.936175787 | 7.97E-07    | 1.94E-05    | down |

Protect against lipid-induced htNSC senescence in ACP

|     |            |             |              |             |              |             |             |      |
|-----|------------|-------------|--------------|-------------|--------------|-------------|-------------|------|
| 668 | CTNND2     | 1694.581202 | -1.34219163  | 0.227268656 | -5.905748971 | 3.51E-09    | 1.59E-07    | down |
| 669 | FAM124A    | 63.74701489 | -1.343758746 | 0.294920943 | -4.556335441 | 5.21E-06    | 9.90E-05    | down |
| 670 | RAB7B      | 141.371978  | -1.345786949 | 0.345382423 | -3.896512564 | 9.76E-05    | 0.001204963 | down |
| 671 | DIRAS2     | 166.5208478 | -1.347240247 | 0.312511208 | -4.31101417  | 1.63E-05    | 0.000262813 | down |
| 672 | LSAMP      | 360.3071649 | -1.347756906 | 0.187817785 | -7.175874785 | 7.18E-13    | 7.02E-11    | down |
| 673 | SLC26A7    | 31.58570133 | -1.353566318 | 0.425294029 | -3.182660053 | 0.001459288 | 0.011122001 | down |
| 674 | SEMA5B     | 447.3175424 | -1.354464793 | 0.269965742 | -5.017172864 | 5.24E-07    | 1.35E-05    | down |
| 675 | NKAIN3-IT1 | 263.8901041 | -1.362988337 | 0.27996566  | -4.868412563 | 1.12E-06    | 2.65E-05    | down |
| 676 | NFIA       | 300.150639  | -1.365988429 | 0.182757908 | -7.47430546  | 7.76E-14    | 9.46E-12    | down |
| 677 | FZD4       | 831.5987354 | -1.371567144 | 0.199844394 | -6.863175486 | 6.73E-12    | 5.53E-10    | down |
| 678 | RNF112     | 39.40153138 | -1.371903667 | 0.262304001 | -5.230204883 | 1.69E-07    | 5.03E-06    | down |
| 679 | DOK5       | 112.0286663 | -1.382431588 | 0.533003462 | -2.593663432 | 0.00949594  | 0.048720753 | down |
| 680 | AC125613.1 | 49.622983   | -1.383191308 | 0.180379722 | -7.668219521 | 1.74E-14    | 2.38E-12    | down |
| 681 | SLC5A4-AS1 | 12.6914524  | -1.386507823 | 0.474559342 | -2.921674281 | 0.003481554 | 0.022162616 | down |
| 682 | PPL        | 154.7141912 | -1.389009322 | 0.525213833 | -2.644654872 | 0.008177428 | 0.043269387 | down |
| 683 | AL078644.1 | 5.843108752 | -1.39340121  | 0.536889666 | -2.595321343 | 0.009450252 | 0.048516535 | down |
| 684 | ABLIM2     | 19.42527388 | -1.394348531 | 0.390324195 | -3.572283118 | 0.000353883 | 0.003525148 | down |
| 685 | ARHGEF6    | 2922.118495 | -1.395691039 | 0.256637104 | -5.438383683 | 5.38E-08    | 1.85E-06    | down |
| 686 | KCNF1      | 28.79481016 | -1.396010959 | 0.427933458 | -3.262215032 | 0.001105453 | 0.00892825  | down |
| 687 | ADCYAP1R1  | 527.5063189 | -1.396237969 | 0.488215019 | -2.859883278 | 0.00423797  | 0.025804216 | down |
| 688 | MLC1       | 4275.192162 | -1.398505366 | 0.200344962 | -6.980486802 | 2.94E-12    | 2.56E-10    | down |
| 689 | ILDR2      | 706.1293433 | -1.399112696 | 0.487246581 | -2.871467447 | 0.004085709 | 0.025147858 | down |
| 690 | GRHL1      | 35.71605628 | -1.402550837 | 0.393858493 | -3.561052668 | 0.000369371 | 0.003649084 | down |
| 691 | SEMA6A-AS1 | 67.50983533 | -1.403645072 | 0.225927339 | -6.212816375 | 5.20E-10    | 2.90E-08    | down |
| 692 | C5AR1      | 16.0611184  | -1.404389134 | 0.500581699 | -2.805514336 | 0.005023635 | 0.029553951 | down |

Protect against lipid-induced htNSC senescence in ACP

|     |            |             |              |             |              |             |             |      |
|-----|------------|-------------|--------------|-------------|--------------|-------------|-------------|------|
| 693 | KCNQ4      | 8.864783548 | -1.406573755 | 0.463601083 | -3.034017407 | 0.002413205 | 0.01652161  | down |
| 694 | AC135977.1 | 9.172956904 | -1.412076373 | 0.545418031 | -2.58898     | 0.009626069 | 0.049220588 | down |
| 695 | AP001528.2 | 29.35520811 | -1.413362864 | 0.286277235 | -4.937042456 | 7.93E-07    | 1.94E-05    | down |
| 696 | FMN2       | 224.0637238 | -1.414226833 | 0.166519898 | -8.492839912 | 2.02E-17    | 4.61E-15    | down |
| 697 | AC005154.4 | 5.707471053 | -1.414238124 | 0.487780136 | -2.899335214 | 0.003739549 | 0.023370457 | down |
| 698 | NRG2       | 84.23299023 | -1.414280963 | 0.171304042 | -8.255969592 | 1.51E-16    | 3.07E-14    | down |
| 699 | ANKRD55    | 9.475583339 | -1.41722876  | 0.526730885 | -2.690612607 | 0.007132096 | 0.03878966  | down |
| 700 | AC006111.2 | 5.942847967 | -1.422688245 | 0.500801375 | -2.840823359 | 0.004499723 | 0.027154374 | down |
| 701 | CNTFR      | 54.75812532 | -1.426045969 | 0.41327367  | -3.450609301 | 0.000559323 | 0.005153108 | down |
| 702 | ZMYND15    | 5.036320839 | -1.426191149 | 0.525284786 | -2.715081777 | 0.006625941 | 0.03680054  | down |
| 703 | SEMA6A     | 1587.434522 | -1.427373883 | 0.184286389 | -7.745411304 | 9.53E-15    | 1.46E-12    | down |
| 704 | ZNF474     | 5.991937117 | -1.42887508  | 0.53266675  | -2.682493471 | 0.007307558 | 0.039508546 | down |
| 705 | EPHB3      | 1723.141063 | -1.431156031 | 0.197961047 | -7.22948304  | 4.85E-13    | 5.01E-11    | down |
| 706 | B3GAT1     | 582.3393006 | -1.431430584 | 0.257945025 | -5.549363017 | 2.87E-08    | 1.07E-06    | down |
| 707 | GAREM2     | 564.6772712 | -1.433105932 | 0.284257576 | -5.041575153 | 4.62E-07    | 1.21E-05    | down |
| 708 | ARC        | 115.9211679 | -1.433192464 | 0.375608507 | -3.815654967 | 0.000135822 | 0.001585579 | down |
| 709 | CSRNP3     | 286.6836608 | -1.433751051 | 0.196884167 | -7.28220593  | 3.28E-13    | 3.58E-11    | down |
| 710 | SREBF2     | 3543.049035 | -1.434602326 | 0.357445001 | -4.013491086 | 5.98E-05    | 0.000799306 | down |
| 711 | PRDM8      | 68.2616109  | -1.436124315 | 0.278248045 | -5.161309625 | 2.45E-07    | 6.86E-06    | down |
| 712 | SNORA5A    | 6.030807507 | -1.443449122 | 0.536206998 | -2.691962482 | 0.007103294 | 0.03871257  | down |
| 713 | CLU        | 9831.745969 | -1.445962642 | 0.151387248 | -9.551416412 | 1.28E-21    | 6.20E-19    | down |
| 714 | PCDH15     | 16.47840505 | -1.449311678 | 0.536446926 | -2.701686986 | 0.006898868 | 0.037831361 | down |
| 715 | SLC5A3     | 2220.933259 | -1.449864839 | 0.267440171 | -5.421268001 | 5.92E-08    | 2.00E-06    | down |
| 716 | BMP8A      | 7.033553107 | -1.45924078  | 0.557124858 | -2.619234737 | 0.008812728 | 0.046017767 | down |
| 717 | FABP7      | 2712.729485 | -1.462595328 | 0.274075939 | -5.33646015  | 9.48E-08    | 3.01E-06    | down |



Protect against lipid-induced htNSC senescence in ACP

|     |            |             |              |             |              |             |             |      |
|-----|------------|-------------|--------------|-------------|--------------|-------------|-------------|------|
| 718 | UBE2QL1    | 32.49796994 | -1.463398082 | 0.353304211 | -4.142034072 | 3.44E-05    | 0.000502441 | down |
| 719 | HAS3       | 110.7603499 | -1.463587353 | 0.225614285 | -6.487121836 | 8.75E-11    | 5.75E-09    | down |
| 720 | TMTC2      | 619.0261396 | -1.465111563 | 0.28376773  | -5.163066157 | 2.43E-07    | 6.80E-06    | down |
| 721 | TPPP3      | 39.71046707 | -1.466543047 | 0.314000728 | -4.670508432 | 3.00E-06    | 6.18E-05    | down |
| 722 | AL024508.2 | 5.14234298  | -1.466933338 | 0.525537666 | -2.791300095 | 0.005249677 | 0.030585298 | down |
| 723 | AC068987.3 | 10.24798791 | -1.469250303 | 0.45044133  | -3.261801717 | 0.001107066 | 0.008935429 | down |
| 724 | KCNJ6      | 201.8738526 | -1.469988287 | 0.273042647 | -5.383731453 | 7.30E-08    | 2.42E-06    | down |
| 725 | LINC01715  | 5.560428477 | -1.471810633 | 0.508489259 | -2.894477332 | 0.003797903 | 0.023669761 | down |
| 726 | FGFR1      | 5299.802531 | -1.472025835 | 0.16408918  | -8.970889076 | 2.94E-19    | 9.98E-17    | down |
| 727 | RPS27P25   | 9.140532587 | -1.479030679 | 0.399887398 | -3.698617879 | 0.000216777 | 0.002347761 | down |
| 728 | GUCY1B1    | 211.649697  | -1.483156908 | 0.270550584 | -5.481994845 | 4.21E-08    | 1.49E-06    | down |
| 729 | LINC01748  | 9.101033517 | -1.484770673 | 0.504401078 | -2.943631048 | 0.003243865 | 0.021014421 | down |
| 730 | SRGAP3     | 877.0969714 | -1.486121429 | 0.138437379 | -10.73497233 | 6.97E-27    | 8.35E-24    | down |
| 731 | ABTB2      | 182.3183789 | -1.489677786 | 0.24739236  | -6.021518969 | 1.73E-09    | 8.25E-08    | down |
| 732 | INKA2      | 28.62696158 | -1.489779403 | 0.357579068 | -4.166293658 | 3.10E-05    | 0.000458444 | down |
| 733 | AC046134.1 | 4.711017177 | -1.490204603 | 0.561200256 | -2.655388318 | 0.007921716 | 0.042146344 | down |
| 734 | TTBK1      | 41.43524537 | -1.491660133 | 0.366330891 | -4.071892839 | 4.66E-05    | 0.000649    | down |
| 735 | NPIPA3     | 6.405053866 | -1.499846011 | 0.475799457 | -3.152265072 | 0.001620091 | 0.012074187 | down |
| 736 | AC110619.1 | 18.90263879 | -1.500293943 | 0.401977246 | -3.732285742 | 0.00018975  | 0.002099729 | down |
| 737 | CEND1      | 283.0464716 | -1.50059423  | 0.297439778 | -5.045035472 | 4.53E-07    | 1.19E-05    | down |
| 738 | CACNA1C    | 62.68017101 | -1.507382886 | 0.343609707 | -4.386904258 | 1.15E-05    | 0.000194436 | down |
| 739 | SOX6       | 296.7979275 | -1.511245773 | 0.267364685 | -5.652376161 | 1.58E-08    | 6.32E-07    | down |
| 740 | CKB        | 7185.077283 | -1.518087782 | 0.175176555 | -8.666044276 | 4.47E-18    | 1.15E-15    | down |
| 741 | BAIAP3     | 18.90308957 | -1.521621383 | 0.541369961 | -2.810686765 | 0.004943589 | 0.029167317 | down |
| 742 | LRRN3      | 328.6265697 | -1.529852868 | 0.418451813 | -3.655983365 | 0.000256198 | 0.002702822 | down |

Protect against lipid-induced htNSC senescence in ACP

|     |            |             |              |             |              |             |             |      |
|-----|------------|-------------|--------------|-------------|--------------|-------------|-------------|------|
| 743 | AC087623.1 | 40.61963078 | -1.531422062 | 0.206943514 | -7.400193582 | 1.36E-13    | 1.56E-11    | down |
| 744 | PRKCB      | 258.1614233 | -1.532641216 | 0.315475012 | -4.858201621 | 1.18E-06    | 2.75E-05    | down |
| 745 | FGD3       | 24.59058723 | -1.533520734 | 0.364724569 | -4.204599486 | 2.62E-05    | 0.000396386 | down |
| 746 | UNC13D     | 30.96435033 | -1.540119323 | 0.307269599 | -5.012273671 | 5.38E-07    | 1.38E-05    | down |
| 747 | FUT8-AS1   | 21.31597085 | -1.541982363 | 0.368867917 | -4.18031033  | 2.91E-05    | 0.000434575 | down |
| 748 | FRMD3      | 20.97054774 | -1.546779643 | 0.339567054 | -4.555152291 | 5.23E-06    | 9.94E-05    | down |
| 749 | AK5        | 128.501805  | -1.550183303 | 0.369403048 | -4.196455099 | 2.71E-05    | 0.000407709 | down |
| 750 | LINC02044  | 6.534152868 | -1.557458549 | 0.523243955 | -2.976543797 | 0.002915174 | 0.01926513  | down |
| 751 | PLEKHA7    | 554.5701562 | -1.558028719 | 0.465901734 | -3.344114443 | 0.000825457 | 0.007094608 | down |
| 752 | NDST4      | 6.093221312 | -1.563907378 | 0.531397609 | -2.943007931 | 0.003250401 | 0.021045288 | down |
| 753 | CSPG5      | 89.96361793 | -1.574356784 | 0.308417104 | -5.104635128 | 3.31E-07    | 8.93E-06    | down |
| 754 | PLCE1-AS1  | 5.097318625 | -1.57563974  | 0.60260037  | -2.614734106 | 0.008929694 | 0.04641754  | down |
| 755 | OGDHL      | 434.1521052 | -1.581870971 | 0.224716894 | -7.039394951 | 1.93E-12    | 1.75E-10    | down |
| 756 | HIST2H2BE  | 137.2551089 | -1.581941139 | 0.263379325 | -6.006322394 | 1.90E-09    | 9.03E-08    | down |
| 757 | OR7E14P    | 15.491524   | -1.581992158 | 0.342198488 | -4.623024975 | 3.78E-06    | 7.51E-05    | down |
| 758 | NOS1AP     | 255.1804292 | -1.583007699 | 0.245523631 | -6.447475927 | 1.14E-10    | 7.30E-09    | down |
| 759 | GLS2       | 4.193011998 | -1.58827553  | 0.592247746 | -2.681775559 | 0.007323257 | 0.039582916 | down |
| 760 | AC009166.2 | 11.28657809 | -1.58835037  | 0.427792621 | -3.712898004 | 0.000204899 | 0.002234579 | down |
| 761 | CHD5       | 28.4913424  | -1.588944351 | 0.389308339 | -4.081454701 | 4.48E-05    | 0.000628449 | down |
| 762 | CEBPA      | 8.080970334 | -1.592597296 | 0.604269336 | -2.635575234 | 0.00839948  | 0.044283226 | down |
| 763 | ST6GALNAC5 | 19.08095531 | -1.603486079 | 0.396999859 | -4.039009189 | 5.37E-05    | 0.000728132 | down |
| 764 | ZBTB7C     | 25.68687652 | -1.610026329 | 0.338461134 | -4.756901657 | 1.97E-06    | 4.30E-05    | down |
| 765 | PLEKHB1    | 588.6463199 | -1.615654449 | 0.261054017 | -6.188966045 | 6.06E-10    | 3.29E-08    | down |
| 766 | DOCK10     | 376.072076  | -1.621421084 | 0.212764269 | -7.620739559 | 2.52E-14    | 3.36E-12    | down |
| 767 | GPM6B      | 4913.007113 | -1.62476385  | 0.182006543 | -8.926952986 | 4.38E-19    | 1.44E-16    | down |

Protect against lipid-induced htNSC senescence in ACP

|     |              |             |              |             |              |             |             |      |
|-----|--------------|-------------|--------------|-------------|--------------|-------------|-------------|------|
| 768 | IDI1         | 555.7179595 | -1.625004497 | 0.434776593 | -3.737562055 | 0.000185813 | 0.002065144 | down |
| 769 | ZNF467       | 12.19683563 | -1.627356915 | 0.597514277 | -2.723544824 | 0.006458545 | 0.036037938 | down |
| 770 | PRSS35       | 7.739423074 | -1.628291937 | 0.617644506 | -2.636293082 | 0.00838173  | 0.044212541 | down |
| 771 | LINC01342    | 6.551664326 | -1.629350687 | 0.491039663 | -3.31816513  | 0.000906109 | 0.007645787 | down |
| 772 | C1QL1        | 385.3882907 | -1.635259448 | 0.272888595 | -5.99240672  | 2.07E-09    | 9.79E-08    | down |
| 773 | COL11A1      | 1435.559658 | -1.638232259 | 0.171988602 | -9.525237344 | 1.65E-21    | 7.80E-19    | down |
| 774 | MCF2L-AS1    | 9.270330853 | -1.638969768 | 0.440749959 | -3.718593125 | 0.000200335 | 0.002193206 | down |
| 775 | NLGN3        | 260.5738351 | -1.639182282 | 0.291883181 | -5.61588468  | 1.96E-08    | 7.48E-07    | down |
| 776 | PLEKHA6      | 192.8425199 | -1.646660049 | 0.271634406 | -6.062045211 | 1.34E-09    | 6.66E-08    | down |
| 777 | NCKAP5       | 54.51018998 | -1.653912252 | 0.377109419 | -4.38576225  | 1.16E-05    | 0.000195297 | down |
| 778 | HIST1H3E     | 43.58848702 | -1.655845065 | 0.213440033 | -7.757893587 | 8.64E-15    | 1.33E-12    | down |
| 779 | PHYHIPL      | 25.07941688 | -1.655995288 | 0.31414057  | -5.271510415 | 1.35E-07    | 4.11E-06    | down |
| 780 | AL139241.1   | 12.42418197 | -1.662059766 | 0.437805273 | -3.796344787 | 0.000146845 | 0.001689218 | down |
| 781 | AC021739.5   | 8.631367051 | -1.66502838  | 0.557838733 | -2.984784456 | 0.002837782 | 0.01888238  | down |
| 782 | PTGS1        | 9.896815763 | -1.670669874 | 0.471394801 | -3.544099067 | 0.000393957 | 0.003854571 | down |
| 783 | AP001528.3   | 26.26883473 | -1.674187622 | 0.345330363 | -4.848075362 | 1.25E-06    | 2.89E-05    | down |
| 784 | ATP1B2       | 770.5253661 | -1.675915046 | 0.183456901 | -9.135197648 | 6.53E-20    | 2.33E-17    | down |
| 785 | AL136366.1   | 67.24689175 | -1.677105973 | 0.199374433 | -8.411840701 | 4.04E-17    | 9.03E-15    | down |
| 786 | F3           | 935.0358689 | -1.678672662 | 0.372494112 | -4.506575026 | 6.59E-06    | 0.000121177 | down |
| 787 | SYNE3        | 76.68350737 | -1.678837234 | 0.458824293 | -3.658998136 | 0.000253203 | 0.002679558 | down |
| 788 | ESPN         | 23.88608777 | -1.684096903 | 0.335684774 | -5.016899875 | 5.25E-07    | 1.35E-05    | down |
| 789 | FMOD         | 5.864685057 | -1.684526377 | 0.574579551 | -2.931754834 | 0.003370527 | 0.021648991 | down |
| 790 | PI15         | 437.7900914 | -1.686602428 | 0.301017935 | -5.602996475 | 2.11E-08    | 8.03E-07    | down |
| 791 | BLOC1S1-RDH5 | 37.02079482 | -1.69420521  | 0.244637891 | -6.925358948 | 4.35E-12    | 3.63E-10    | down |
| 792 | ADAM33       | 12.53742155 | -1.696080195 | 0.627002425 | -2.705061619 | 0.006829172 | 0.037582098 | down |

Protect against lipid-induced htNSC senescence in ACP

|     |            |             |              |             |              |             |             |      |
|-----|------------|-------------|--------------|-------------|--------------|-------------|-------------|------|
| 793 | TMEM130    | 17.12960334 | -1.699294267 | 0.464036568 | -3.661983523 | 0.00025027  | 0.002659575 | down |
| 794 | TRIM47     | 311.5380979 | -1.699757975 | 0.238925878 | -7.114164411 | 1.13E-12    | 1.07E-10    | down |
| 795 | HNRNPA1P41 | 5.17004695  | -1.702173457 | 0.558307819 | -3.0488082   | 0.002297511 | 0.01590062  | down |
| 796 | SEMA6D     | 2454.645839 | -1.711963652 | 0.231794314 | -7.385701677 | 1.52E-13    | 1.72E-11    | down |
| 797 | C1orf226   | 534.8984955 | -1.713290645 | 0.198357217 | -8.637400114 | 5.75E-18    | 1.46E-15    | down |
| 798 | SPATA46    | 32.46597688 | -1.713399692 | 0.331702639 | -5.165468978 | 2.40E-07    | 6.73E-06    | down |
| 799 | YBX2       | 4.162254179 | -1.715382691 | 0.583619468 | -2.939214307 | 0.003290455 | 0.021262122 | down |
| 800 | LINC01508  | 46.42541977 | -1.732244852 | 0.345826005 | -5.009006919 | 5.47E-07    | 1.40E-05    | down |
| 801 | SCRG1      | 25.2960518  | -1.732584408 | 0.473744415 | -3.65721337  | 0.000254972 | 0.002694078 | down |
| 802 | TMPRSS5    | 84.39788602 | -1.732938061 | 0.279052877 | -6.210070582 | 5.30E-10    | 2.95E-08    | down |
| 803 | ACAT2      | 348.6332901 | -1.739618123 | 0.481500072 | -3.612913527 | 0.000302776 | 0.003101014 | down |
| 804 | APC2       | 1554.053442 | -1.740166485 | 0.126975318 | -13.70476173 | 9.51E-43    | 9.31E-39    | down |
| 805 | COL4A6     | 483.9392178 | -1.741605483 | 0.136417194 | -12.76675936 | 2.51E-37    | 9.17E-34    | down |
| 806 | MTTP       | 102.4954316 | -1.758553499 | 0.24475912  | -7.184833388 | 6.73E-13    | 6.65E-11    | down |
| 807 | SLC15A3    | 12.75081662 | -1.75895564  | 0.458089861 | -3.839761126 | 0.000123154 | 0.001462123 | down |
| 808 | ZFHX4-AS1  | 115.6406469 | -1.7648261   | 0.242048975 | -7.291194259 | 3.07E-13    | 3.38E-11    | down |
| 809 | NAT8L      | 1154.330431 | -1.776249639 | 0.192275702 | -9.238034865 | 2.51E-20    | 9.83E-18    | down |
| 810 | EDNRB      | 3003.527755 | -1.784477691 | 0.429657272 | -4.153258436 | 3.28E-05    | 0.000480822 | down |
| 811 | KCNJ2-AS1  | 66.76403405 | -1.788163313 | 0.399768713 | -4.472994648 | 7.71E-06    | 0.000137641 | down |
| 812 | SLIT3      | 361.234886  | -1.791028408 | 0.438944354 | -4.080308569 | 4.50E-05    | 0.000630686 | down |
| 813 | THSD1      | 81.22399217 | -1.791167086 | 0.329755212 | -5.431808259 | 5.58E-08    | 1.91E-06    | down |
| 814 | GRM1       | 5.101859611 | -1.808278062 | 0.691829438 | -2.613762817 | 0.008955118 | 0.046502208 | down |
| 815 | SCG2       | 3407.703297 | -1.809289155 | 0.237366874 | -7.622332139 | 2.49E-14    | 3.34E-12    | down |
| 816 | ADRA2C     | 13.16059625 | -1.809813225 | 0.469930668 | -3.851234549 | 0.000117524 | 0.00140264  | down |
| 817 | VWA3B      | 5.701646445 | -1.815468066 | 0.511336073 | -3.55044004  | 0.000384588 | 0.003781067 | down |

Protect against lipid-induced htNSC senescence in ACP

|     |              |             |              |             |              |             |             |      |
|-----|--------------|-------------|--------------|-------------|--------------|-------------|-------------|------|
| 818 | DKFZp451B082 | 4.872306615 | -1.817601732 | 0.643280563 | -2.825519434 | 0.004720402 | 0.028152347 | down |
| 819 | ERBB4        | 185.4806928 | -1.819749376 | 0.253704474 | -7.172712996 | 7.35E-13    | 7.13E-11    | down |
| 820 | PRKG1        | 10.2005262  | -1.841217275 | 0.422281505 | -4.360165557 | 1.30E-05    | 0.000218333 | down |
| 821 | AC131392.1   | 37.69303853 | -1.841236982 | 0.504893872 | -3.646780216 | 0.000265547 | 0.002785574 | down |
| 822 | COL2A1       | 59.87606325 | -1.847188298 | 0.402221566 | -4.592464587 | 4.38E-06    | 8.55E-05    | down |
| 823 | WWC1         | 724.2408582 | -1.854011819 | 0.250912372 | -7.3890809   | 1.48E-13    | 1.68E-11    | down |
| 824 | ITGA7        | 4261.573141 | -1.857743972 | 0.256372492 | -7.246268729 | 4.28E-13    | 4.52E-11    | down |
| 825 | RIMS4        | 356.7372723 | -1.858740715 | 0.216836094 | -8.572100166 | 1.02E-17    | 2.46E-15    | down |
| 826 | AP000889.1   | 3.3231231   | -1.861531348 | 0.714805884 | -2.604247376 | 0.009207627 | 0.04752256  | down |
| 827 | MIR4697HG    | 641.3521913 | -1.862958127 | 0.20956339  | -8.889711728 | 6.13E-19    | 1.98E-16    | down |
| 828 | MYORG        | 326.3410495 | -1.86679712  | 0.420390873 | -4.440622386 | 8.97E-06    | 0.000156635 | down |
| 829 | ZCCHC12      | 37.34674764 | -1.877633948 | 0.342974547 | -5.474557701 | 4.39E-08    | 1.55E-06    | down |
| 830 | PDIA2        | 3.050730238 | -1.879284887 | 0.716715832 | -2.622078098 | 0.00873954  | 0.045697426 | down |
| 831 | GRIA1        | 1159.25764  | -1.879343188 | 0.203292761 | -9.244516034 | 2.36E-20    | 9.62E-18    | down |
| 832 | LINC02538    | 4.744483714 | -1.885645304 | 0.620558138 | -3.038627954 | 0.002376582 | 0.016331278 | down |
| 833 | COL6A3       | 245.5328879 | -1.901050504 | 0.634014394 | -2.998434296 | 0.002713707 | 0.018235571 | down |
| 834 | WSCD1        | 548.9715413 | -1.901688981 | 0.386884475 | -4.915392329 | 8.86E-07    | 2.15E-05    | down |
| 835 | CX3CL1       | 369.6299315 | -1.912238722 | 0.205256927 | -9.316317626 | 1.20E-20    | 5.00E-18    | down |
| 836 | SLC27A3      | 501.0495844 | -1.9155494   | 0.280669092 | -6.824938891 | 8.80E-12    | 7.08E-10    | down |
| 837 | DCLK2        | 1539.287337 | -1.915690611 | 0.273396448 | -7.007006205 | 2.43E-12    | 2.16E-10    | down |
| 838 | AC005740.4   | 4.888718195 | -1.918372809 | 0.676089926 | -2.837452141 | 0.004547516 | 0.02737082  | down |
| 839 | ADGRB1       | 443.4763369 | -1.923543916 | 0.289126271 | -6.652954475 | 2.87E-11    | 2.10E-09    | down |
| 840 | KCNJ2        | 494.1362714 | -1.937344902 | 0.446207582 | -4.34180184  | 1.41E-05    | 0.000234125 | down |
| 841 | LINC02199    | 3.462049446 | -1.937589321 | 0.710471273 | -2.727188834 | 0.006387647 | 0.035730463 | down |
| 842 | AL031686.1   | 4.352584829 | -1.938267931 | 0.715051679 | -2.710668316 | 0.006714776 | 0.037192479 | down |

Protect against lipid-induced htNSC senescence in ACP

|     |            |             |              |             |              |             |             |      |
|-----|------------|-------------|--------------|-------------|--------------|-------------|-------------|------|
| 843 | ENHO       | 50.46794863 | -1.949272906 | 0.350294654 | -5.564666447 | 2.63E-08    | 9.79E-07    | down |
| 844 | A2M        | 1174.392668 | -1.951693021 | 0.376889292 | -5.178425239 | 2.24E-07    | 6.35E-06    | down |
| 845 | RMST       | 143.8167432 | -1.955797154 | 0.198942843 | -9.830950057 | 8.28E-23    | 5.27E-20    | down |
| 846 | STX17-AS1  | 4.381274487 | -1.958765365 | 0.60797911  | -3.221764255 | 0.001274039 | 0.009950407 | down |
| 847 | IFI44L     | 8.473967498 | -1.973546359 | 0.518043683 | -3.80961379  | 0.000139184 | 0.001614773 | down |
| 848 | PCAT14     | 18.76981196 | -1.974200344 | 0.605928673 | -3.258139829 | 0.001121451 | 0.009007444 | down |
| 849 | STOX1      | 15.00062652 | -1.979682203 | 0.406817636 | -4.866264459 | 1.14E-06    | 2.66E-05    | down |
| 850 | BRINP1     | 5.230192431 | -1.980438579 | 0.614160683 | -3.224626116 | 0.001261373 | 0.009863865 | down |
| 851 | SETBP1     | 637.0611258 | -1.98134813  | 0.207420785 | -9.552312385 | 1.27E-21    | 6.20E-19    | down |
| 852 | IGSF9B     | 563.1842417 | -1.985003078 | 0.191766432 | -10.35114988 | 4.13E-25    | 3.51E-22    | down |
| 853 | ASCL1      | 274.5747973 | -1.985914581 | 0.489820026 | -4.054376046 | 5.03E-05    | 0.000691563 | down |
| 854 | TENT5B     | 73.37941193 | -1.991102856 | 0.441581653 | -4.509025329 | 6.51E-06    | 0.000119895 | down |
| 855 | MAOB       | 36.56434365 | -1.994799901 | 0.309174441 | -6.452020728 | 1.10E-10    | 7.13E-09    | down |
| 856 | PCDH7      | 192.0805156 | -1.995419878 | 0.486709706 | -4.099815256 | 4.13E-05    | 0.000587499 | down |
| 857 | RDH5       | 55.99826946 | -2.001813607 | 0.318589402 | -6.283365335 | 3.31E-10    | 1.92E-08    | down |
| 858 | MOB3B      | 47.27453108 | -2.006131257 | 0.463626679 | -4.327040159 | 1.51E-05    | 0.000247354 | down |
| 859 | RNF157-AS1 | 47.68971005 | -2.009565141 | 0.218575725 | -9.193908175 | 3.79E-20    | 1.40E-17    | down |
| 860 | AL445307.1 | 5.94827541  | -2.013199903 | 0.507147155 | -3.969656312 | 7.20E-05    | 0.000931666 | down |
| 861 | EFL1P1     | 2.966327038 | -2.013425064 | 0.70341647  | -2.862351323 | 0.004205105 | 0.025673206 | down |
| 862 | AC018659.2 | 6.86819177  | -2.013937853 | 0.525617459 | -3.831565748 | 0.00012733  | 0.00150255  | down |
| 863 | ANGPTL1    | 32.92484966 | -2.01737156  | 0.449744929 | -4.485590453 | 7.27E-06    | 0.00013125  | down |
| 864 | LRRN2      | 118.3659907 | -2.023563056 | 0.223331999 | -9.060784217 | 1.30E-19    | 4.47E-17    | down |
| 865 | ID4        | 355.703654  | -2.028146331 | 0.518658259 | -3.910371226 | 9.22E-05    | 0.001153523 | down |
| 866 | GDPD2      | 157.1667616 | -2.029566401 | 0.264105602 | -7.684677598 | 1.53E-14    | 2.12E-12    | down |
| 867 | AC099792.1 | 18.64117114 | -2.035878175 | 0.445414351 | -4.570751191 | 4.86E-06    | 9.32E-05    | down |

Protect against lipid-induced htNSC senescence in ACP

|     |            |             |              |             |              |             |             |      |
|-----|------------|-------------|--------------|-------------|--------------|-------------|-------------|------|
| 868 | HEPACAM    | 6.982622499 | -2.047210861 | 0.761166055 | -2.689571937 | 0.007154373 | 0.038876482 | down |
| 869 | C11orf87   | 6.703437484 | -2.062198829 | 0.752948966 | -2.738829484 | 0.006165834 | 0.034764089 | down |
| 870 | GAS1RR     | 3.024095741 | -2.064778003 | 0.780458424 | -2.645596407 | 0.008154705 | 0.043205293 | down |
| 871 | KLF15      | 62.00107786 | -2.079790324 | 0.406012094 | -5.122483682 | 3.02E-07    | 8.22E-06    | down |
| 872 | ELMO1      | 965.0590059 | -2.081084948 | 0.513909804 | -4.049514005 | 5.13E-05    | 0.000703237 | down |
| 873 | EGR2       | 24.07962013 | -2.088745311 | 0.634283294 | -3.293079495 | 0.000990965 | 0.008188729 | down |
| 874 | LHFPL3     | 17.34262865 | -2.092176431 | 0.49069497  | -4.263700584 | 2.01E-05    | 0.000315516 | down |
| 875 | RIPOR3     | 40.77985383 | -2.095243261 | 0.344410367 | -6.083566187 | 1.18E-09    | 5.95E-08    | down |
| 876 | C21orf62   | 45.13356087 | -2.096925106 | 0.335908817 | -6.242542621 | 4.31E-10    | 2.46E-08    | down |
| 877 | PTPRZ1     | 3213.664892 | -2.098424512 | 0.258655191 | -8.112825815 | 4.95E-16    | 8.99E-14    | down |
| 878 | LONRF2     | 1427.327824 | -2.103865313 | 0.288715259 | -7.28699036  | 3.17E-13    | 3.47E-11    | down |
| 879 | BMPER      | 18.2724306  | -2.107137408 | 0.399489268 | -5.274578262 | 1.33E-07    | 4.04E-06    | down |
| 880 | RHBDL3     | 513.9218827 | -2.109741826 | 0.28625093  | -7.370253168 | 1.70E-13    | 1.91E-11    | down |
| 881 | AC021739.2 | 21.10641439 | -2.112321559 | 0.536274311 | -3.938882612 | 8.19E-05    | 0.001043049 | down |
| 882 | AC007344.1 | 15.32371681 | -2.115993069 | 0.516813543 | -4.094306539 | 4.23E-05    | 0.000599968 | down |
| 883 | AC120049.1 | 20.78017913 | -2.119058232 | 0.388904704 | -5.448785299 | 5.07E-08    | 1.76E-06    | down |
| 884 | NRXN1      | 7.857755703 | -2.129081645 | 0.49780463  | -4.276942229 | 1.89E-05    | 0.000300464 | down |
| 885 | PRIMA1     | 14.48425836 | -2.130541424 | 0.434251901 | -4.906233956 | 9.28E-07    | 2.23E-05    | down |
| 886 | GPR158     | 46.60218833 | -2.141016904 | 0.421281678 | -5.082150534 | 3.73E-07    | 9.95E-06    | down |
| 887 | HES6       | 1150.158237 | -2.151582644 | 0.565780579 | -3.802857018 | 0.000143037 | 0.00165288  | down |
| 888 | RND1       | 38.12882901 | -2.153702045 | 0.324573318 | -6.63548703  | 3.23E-11    | 2.35E-09    | down |
| 889 | APLNR      | 53.72991144 | -2.156132786 | 0.413279135 | -5.217134381 | 1.82E-07    | 5.34E-06    | down |
| 890 | OPRD1      | 2.888744997 | -2.156294857 | 0.826977404 | -2.607441082 | 0.009122177 | 0.047177201 | down |
| 891 | AC007448.4 | 2.915101088 | -2.160243575 | 0.762251542 | -2.834029786 | 0.004596505 | 0.027583093 | down |
| 892 | SLCO1C1    | 16.08844011 | -2.167262243 | 0.432428502 | -5.011839486 | 5.39E-07    | 1.38E-05    | down |



Protect against lipid-induced htNSC senescence in ACP

|     |            |             |              |             |              |             |             |      |
|-----|------------|-------------|--------------|-------------|--------------|-------------|-------------|------|
| 893 | RASGEF1B   | 6.849394454 | -2.183575548 | 0.809320249 | -2.69803647  | 0.00697498  | 0.038166505 | down |
| 894 | VSTM4      | 99.20703389 | -2.184735755 | 0.302196736 | -7.229514737 | 4.85E-13    | 5.01E-11    | down |
| 895 | EPHA7      | 35.84042105 | -2.193101597 | 0.388747903 | -5.641449337 | 1.69E-08    | 6.72E-07    | down |
| 896 | ANKFN1     | 71.86562956 | -2.195749804 | 0.388056114 | -5.658330644 | 1.53E-08    | 6.13E-07    | down |
| 897 | GATM       | 100.6052475 | -2.202851944 | 0.211241111 | -10.42814033 | 1.84E-25    | 1.71E-22    | down |
| 898 | B3GAT2     | 15.75785133 | -2.203368595 | 0.342709189 | -6.429266169 | 1.28E-10    | 8.11E-09    | down |
| 899 | WARS2-IT1  | 4.549128354 | -2.208501716 | 0.644314192 | -3.42767821  | 0.000608767 | 0.005531056 | down |
| 900 | AC025154.2 | 21.24161179 | -2.214210737 | 0.483999083 | -4.574824242 | 4.77E-06    | 9.16E-05    | down |
| 901 | COL9A3     | 480.5153392 | -2.218414104 | 0.42172162  | -5.26037556  | 1.44E-07    | 4.33E-06    | down |
| 902 | GADD45G    | 287.9397762 | -2.220743303 | 0.487977587 | -4.550912501 | 5.34E-06    | 0.00010098  | down |
| 903 | CITED1     | 7.668622721 | -2.223123693 | 0.690560086 | -3.219305225 | 0.001285016 | 0.010021661 | down |
| 904 | LINC01750  | 58.63905355 | -2.226939796 | 0.288571958 | -7.717103945 | 1.19E-14    | 1.72E-12    | down |
| 905 | FAM107A    | 3.961012746 | -2.231210639 | 0.675603258 | -3.302545707 | 0.000958115 | 0.007992619 | down |
| 906 | AL359198.1 | 4.32652916  | -2.232510615 | 0.697527674 | -3.200605079 | 0.001371394 | 0.010564867 | down |
| 907 | LPAR3      | 12.71552943 | -2.236133111 | 0.547848153 | -4.081665876 | 4.47E-05    | 0.000628311 | down |
| 908 | AC107294.2 | 18.33117229 | -2.237851579 | 0.434535698 | -5.149983277 | 2.61E-07    | 7.22E-06    | down |
| 909 | AL158064.1 | 19.09806601 | -2.238925224 | 0.429813681 | -5.209059934 | 1.90E-07    | 5.53E-06    | down |
| 910 | FLVCR2     | 6.068525171 | -2.271861395 | 0.675879901 | -3.361338887 | 0.000775656 | 0.006761625 | down |
| 911 | SLC1A2     | 246.4854446 | -2.273267913 | 0.303090799 | -7.500286772 | 6.37E-14    | 7.86E-12    | down |
| 912 | ELAVL3     | 3.084891741 | -2.282002668 | 0.706945279 | -3.227976389 | 0.001246693 | 0.009793175 | down |
| 913 | CLEC19A    | 7.18673733  | -2.289557724 | 0.672113775 | -3.406503198 | 0.000658008 | 0.005915098 | down |
| 914 | NYAP1      | 16.0684352  | -2.299106777 | 0.459733791 | -5.000952338 | 5.70E-07    | 1.45E-05    | down |
| 915 | SYT12      | 324.5578584 | -2.302568707 | 0.308781275 | -7.456957043 | 8.85E-14    | 1.05E-11    | down |
| 916 | PTGDS      | 4.43595383  | -2.307554244 | 0.692224118 | -3.333536329 | 0.000857495 | 0.007311328 | down |
| 917 | AL591686.2 | 6.604265278 | -2.310612276 | 0.762993678 | -3.028350488 | 0.002458927 | 0.016783847 | down |

Protect against lipid-induced htNSC senescence in ACP

|     |            |             |              |             |              |             |             |      |
|-----|------------|-------------|--------------|-------------|--------------|-------------|-------------|------|
| 918 | SNRPGP10   | 37.38316043 | -2.341623457 | 0.383615697 | -6.104086651 | 1.03E-09    | 5.34E-08    | down |
| 919 | AC091078.1 | 11.3185954  | -2.343293654 | 0.451100466 | -5.194615906 | 2.05E-07    | 5.92E-06    | down |
| 920 | CTNNA3     | 34.7934774  | -2.34957349  | 0.303462539 | -7.742548702 | 9.74E-15    | 1.48E-12    | down |
| 921 | AP003068.4 | 5.343884614 | -2.35255556  | 0.586761972 | -4.009386556 | 6.09E-05    | 0.00080908  | down |
| 922 | TMEM163    | 5.423740584 | -2.36533072  | 0.700814535 | -3.375116529 | 0.000737844 | 0.006481126 | down |
| 923 | CDH8       | 11.23283798 | -2.373737477 | 0.567820158 | -4.1804389   | 2.91E-05    | 0.000434575 | down |
| 924 | ABAT       | 504.6277235 | -2.381554291 | 0.225311028 | -10.57007424 | 4.10E-26    | 4.32E-23    | down |
| 925 | PDZRN4     | 2.89431635  | -2.395684462 | 0.737433543 | -3.248678453 | 0.001159425 | 0.009228711 | down |
| 926 | AC046168.2 | 2.183783224 | -2.406619411 | 0.928563717 | -2.591765506 | 0.009548483 | 0.048885256 | down |
| 927 | AL161910.1 | 21.10363566 | -2.415380914 | 0.412047291 | -5.861902181 | 4.58E-09    | 2.01E-07    | down |
| 928 | ADGRA1     | 5.153628332 | -2.415720298 | 0.750350933 | -3.219453979 | 0.00128435  | 0.010021661 | down |
| 929 | PLCH2      | 4.41894638  | -2.430006574 | 0.930427064 | -2.611710974 | 0.009009038 | 0.04668695  | down |
| 930 | SLC6A11    | 946.0929929 | -2.43562417  | 0.368360771 | -6.612061758 | 3.79E-11    | 2.73E-09    | down |
| 931 | FAM181B    | 39.33471872 | -2.435706971 | 0.555882664 | -4.381692631 | 1.18E-05    | 0.000198487 | down |
| 932 | KCNB1      | 12.15638432 | -2.436823622 | 0.683214303 | -3.566704636 | 0.000361499 | 0.003585227 | down |
| 933 | NCAN       | 532.7073494 | -2.444379463 | 0.31886416  | -7.665895921 | 1.78E-14    | 2.41E-12    | down |
| 934 | UNC80      | 315.2866557 | -2.444496078 | 0.241629199 | -10.11672465 | 4.66E-24    | 3.38E-21    | down |
| 935 | MGC32805   | 2.996977808 | -2.450395609 | 0.755775649 | -3.242226201 | 0.001185998 | 0.009388847 | down |
| 936 | FGFR3      | 890.6624678 | -2.451708277 | 0.445929135 | -5.497977331 | 3.84E-08    | 1.39E-06    | down |
| 937 | KLHDC8A    | 783.9268892 | -2.454210791 | 0.281110464 | -8.730414206 | 2.54E-18    | 6.89E-16    | down |
| 938 | CYP4F24P   | 7.147621582 | -2.457500267 | 0.542567088 | -4.529394281 | 5.92E-06    | 0.000109792 | down |
| 939 | MASP1      | 55.77752445 | -2.458911573 | 0.670632913 | -3.666553676 | 0.000245841 | 0.00262072  | down |
| 940 | DCC        | 100.9669749 | -2.467189784 | 0.366153707 | -6.738125913 | 1.60E-11    | 1.25E-09    | down |
| 941 | AC026620.1 | 4.551058562 | -2.468884736 | 0.727935677 | -3.391624857 | 0.000694795 | 0.006193836 | down |
| 942 | DCX        | 229.7790282 | -2.479830265 | 0.44106326  | -5.622391365 | 1.88E-08    | 7.26E-07    | down |

Protect against lipid-induced htNSC senescence in ACP

|     |            |             |              |             |              |             |             |      |
|-----|------------|-------------|--------------|-------------|--------------|-------------|-------------|------|
| 943 | AP000280.1 | 17.7304799  | -2.485307119 | 0.5661037   | -4.390197624 | 1.13E-05    | 0.000191993 | down |
| 944 | LINC01176  | 12.52708441 | -2.49217926  | 0.509816872 | -4.888381298 | 1.02E-06    | 2.42E-05    | down |
| 945 | KIAA1211L  | 67.37681054 | -2.524471809 | 0.477379347 | -5.288188155 | 1.24E-07    | 3.77E-06    | down |
| 946 | FBN3       | 2.330580718 | -2.535576639 | 0.956235085 | -2.651624772 | 0.008010551 | 0.042552264 | down |
| 947 | TMOD1      | 23.24589754 | -2.53725377  | 0.439213796 | -5.776808005 | 7.61E-09    | 3.24E-07    | down |
| 948 | COL21A1    | 44.10889149 | -2.537393583 | 0.850235436 | -2.984342309 | 0.002841886 | 0.018903512 | down |
| 949 | AC069120.1 | 13.32445098 | -2.541585578 | 0.628241404 | -4.045555675 | 5.22E-05    | 0.000711397 | down |
| 950 | LIPG       | 1604.024716 | -2.542155927 | 0.507416665 | -5.00999692  | 5.44E-07    | 1.39E-05    | down |
| 951 | AC025165.4 | 3.978929465 | -2.5602923   | 0.759457491 | -3.371212124 | 0.000748382 | 0.006568021 | down |
| 952 | HMGCS1     | 1610.895841 | -2.566369744 | 0.577598925 | -4.443169186 | 8.86E-06    | 0.000154924 | down |
| 953 | C2orf80    | 32.66918989 | -2.570597005 | 0.362367704 | -7.093891028 | 1.30E-12    | 1.21E-10    | down |
| 954 | NPTX2      | 168.1773252 | -2.576096912 | 0.602094865 | -4.278556522 | 1.88E-05    | 0.000298759 | down |
| 955 | CILP       | 3.208671104 | -2.589974253 | 0.930989451 | -2.781958755 | 0.005403191 | 0.031325275 | down |
| 956 | AC245884.9 | 25.50198953 | -2.61143495  | 0.395624562 | -6.600790755 | 4.09E-11    | 2.92E-09    | down |
| 957 | DHRS9      | 7.769951298 | -2.619539486 | 0.555671026 | -4.714191244 | 2.43E-06    | 5.16E-05    | down |
| 958 | ROBO2      | 2.90595631  | -2.646410048 | 0.839870113 | -3.150975379 | 0.001627262 | 0.012112147 | down |
| 959 | EGR3       | 31.94150817 | -2.657286512 | 0.803216039 | -3.308308576 | 0.000938613 | 0.007861417 | down |
| 960 | KCND3      | 834.7867502 | -2.659154983 | 0.274720853 | -9.679479926 | 3.69E-22    | 2.03E-19    | down |
| 961 | CADM2      | 14.34234904 | -2.680016304 | 0.451116834 | -5.940847478 | 2.84E-09    | 1.30E-07    | down |
| 962 | SNCAIP     | 580.8020108 | -2.684394802 | 0.220065386 | -12.19816916 | 3.18E-34    | 8.09E-31    | down |
| 963 | SPARCL1    | 490.588011  | -2.698146458 | 0.235605829 | -11.45195119 | 2.30E-30    | 4.26E-27    | down |
| 964 | AC087289.5 | 5.972386279 | -2.708961922 | 0.613020946 | -4.419036478 | 9.91E-06    | 0.000170925 | down |
| 965 | SORCS1     | 10.69628287 | -2.718810173 | 0.565436199 | -4.808341204 | 1.52E-06    | 3.45E-05    | down |
| 966 | DNM3OS     | 6.457227329 | -2.724903371 | 0.625246777 | -4.35812462  | 1.31E-05    | 0.000220016 | down |
| 967 | C1orf61    | 2249.434951 | -2.732806604 | 0.377049812 | -7.247866239 | 4.23E-13    | 4.50E-11    | down |

Protect against lipid-induced htNSC senescence in ACP

|     |            |             |              |             |              |             |             |      |
|-----|------------|-------------|--------------|-------------|--------------|-------------|-------------|------|
| 968 | CRB2       | 694.1923181 | -2.744907743 | 0.28734842  | -9.55254162  | 1.27E-21    | 6.20E-19    | down |
| 969 | RASSF10    | 8.734638507 | -2.759749007 | 0.620344709 | -4.448734658 | 8.64E-06    | 0.000151615 | down |
| 970 | NPR1       | 23.62438543 | -2.765930238 | 0.588710988 | -4.698281997 | 2.62E-06    | 5.51E-05    | down |
| 971 | MIR9-3HG   | 18.06710279 | -2.768883248 | 0.726640951 | -3.810524639 | 0.000138672 | 0.001609752 | down |
| 972 | BCAN       | 272.2881934 | -2.805271536 | 0.331950456 | -8.45087417  | 2.89E-17    | 6.54E-15    | down |
| 973 | AC107294.1 | 2.260249568 | -2.808682557 | 0.920942666 | -3.049790896 | 0.002290007 | 0.015870266 | down |
| 974 | FGF1       | 87.93596188 | -2.810159759 | 0.377916189 | -7.435933781 | 1.04E-13    | 1.22E-11    | down |
| 975 | ANOS1      | 118.4046558 | -2.821661502 | 0.376068364 | -7.503054679 | 6.23E-14    | 7.74E-12    | down |
| 976 | AQP5       | 4.155161943 | -2.832304294 | 0.865815854 | -3.27125483  | 0.001070714 | 0.00868816  | down |
| 977 | C4orf54    | 2.699388178 | -2.856668999 | 1.033477925 | -2.764131609 | 0.005707451 | 0.03280253  | down |
| 978 | PCDH8      | 136.7430394 | -2.857130005 | 0.551912704 | -5.176778839 | 2.26E-07    | 6.39E-06    | down |
| 979 | METTL7B    | 314.4906572 | -2.865920757 | 0.320532694 | -8.941118365 | 3.85E-19    | 1.29E-16    | down |
| 980 | AC107294.3 | 7.072236169 | -2.870656068 | 0.652769031 | -4.397659709 | 1.09E-05    | 0.000186443 | down |
| 981 | SUSD4      | 52.3124644  | -2.873298124 | 0.689694624 | -4.166043964 | 3.10E-05    | 0.000458612 | down |
| 982 | RNA5SP61   | 2.362007989 | -2.874534583 | 1.05917799  | -2.713929681 | 0.006649028 | 0.036878468 | down |
| 983 | AL359091.1 | 19.94051751 | -2.937960258 | 0.547210476 | -5.368976631 | 7.92E-08    | 2.60E-06    | down |
| 984 | RGS4       | 127.102801  | -2.959453114 | 0.70510778  | -4.197164176 | 2.70E-05    | 0.000406832 | down |
| 985 | KCNA4      | 7.388465519 | -2.970735672 | 0.582644263 | -5.09871265  | 3.42E-07    | 9.19E-06    | down |
| 986 | PTX3       | 399.3305519 | -2.977341154 | 0.457532382 | -6.507388924 | 7.65E-11    | 5.12E-09    | down |
| 987 | CP         | 506.2189679 | -2.979262113 | 0.467947127 | -6.366663975 | 1.93E-10    | 1.18E-08    | down |
| 988 | WDR49      | 7.51120607  | -2.98047816  | 0.574998016 | -5.183458166 | 2.18E-07    | 6.22E-06    | down |
| 989 | GRIK3      | 43.13058065 | -2.984632034 | 0.350069699 | -8.525822272 | 1.52E-17    | 3.55E-15    | down |
| 990 | SEZ6L      | 28.82279977 | -2.992704348 | 0.623586784 | -4.799178599 | 1.59E-06    | 3.60E-05    | down |
| 991 | LRRC4      | 48.35691763 | -3.013163929 | 0.406648645 | -7.409747859 | 1.27E-13    | 1.46E-11    | down |
| 992 | CELF3      | 4.080732095 | -3.013968155 | 0.777269531 | -3.877635792 | 0.000105476 | 0.001284639 | down |

Protect against lipid-induced htNSC senescence in ACP

|      |            |             |              |             |              |             |             |      |
|------|------------|-------------|--------------|-------------|--------------|-------------|-------------|------|
| 993  | LINC01497  | 36.06906866 | -3.034259785 | 0.829322072 | -3.658723056 | 0.000253475 | 0.002681042 | down |
| 994  | LINC01085  | 2.618563625 | -3.055357279 | 0.979672917 | -3.118752418 | 0.001816185 | 0.013249496 | down |
| 995  | IGSF11     | 19.65079569 | -3.066261718 | 0.565995812 | -5.417463616 | 6.05E-08    | 2.04E-06    | down |
| 996  | CCDC177    | 12.81365897 | -3.093914473 | 0.48523956  | -6.376055716 | 1.82E-10    | 1.12E-08    | down |
| 997  | LINC00606  | 19.55338157 | -3.135490046 | 0.41318084  | -7.588662736 | 3.23E-14    | 4.25E-12    | down |
| 998  | RFX4       | 251.1394024 | -3.147241518 | 0.308531168 | -10.20072474 | 1.97E-24    | 1.48E-21    | down |
| 999  | STARD4     | 215.5280187 | -3.158126673 | 0.740623738 | -4.264144544 | 2.01E-05    | 0.000315265 | down |
| 1000 | AC007036.1 | 2.814835488 | -3.171258828 | 1.020454683 | -3.107691973 | 0.001885545 | 0.013623697 | down |
| 1001 | TTYH1      | 3432.069903 | -3.173465627 | 0.418992227 | -7.574044159 | 3.62E-14    | 4.66E-12    | down |
| 1002 | AL137005.1 | 6.116546866 | -3.176415802 | 0.730037432 | -4.351031417 | 1.35E-05    | 0.00022669  | down |
| 1003 | NWD1       | 19.61232266 | -3.19243492  | 0.485622592 | -6.573901162 | 4.90E-11    | 3.41E-09    | down |
| 1004 | LINC02409  | 2.275379693 | -3.208076636 | 1.053217595 | -3.045977063 | 0.002319255 | 0.016018438 | down |
| 1005 | HRK        | 79.91335979 | -3.208434196 | 0.369947078 | -8.672684252 | 4.22E-18    | 1.12E-15    | down |
| 1006 | GFAP       | 31153.88037 | -3.212371764 | 0.768062012 | -4.182438023 | 2.88E-05    | 0.00043209  | down |
| 1007 | SLIT1      | 25.36567099 | -3.23066666  | 0.478159011 | -6.756469255 | 1.41E-11    | 1.12E-09    | down |
| 1008 | RYR2       | 2.940537913 | -3.239782328 | 1.144633427 | -2.830410376 | 0.004648833 | 0.027798795 | down |
| 1009 | AC006305.1 | 5.827522336 | -3.241881521 | 0.998471335 | -3.246844859 | 0.00116692  | 0.009281115 | down |
| 1010 | AC018647.1 | 5.929360839 | -3.28669661  | 0.699656734 | -4.69758447  | 2.63E-06    | 5.53E-05    | down |
| 1011 | SLC15A2    | 78.91459474 | -3.36979467  | 0.352591392 | -9.557223312 | 1.21E-21    | 6.20E-19    | down |
| 1012 | STUM       | 6.399106337 | -3.423219413 | 0.668560532 | -5.120283424 | 3.05E-07    | 8.30E-06    | down |
| 1013 | SMOC1      | 29.61912639 | -3.451775071 | 0.55639663  | -6.203802978 | 5.51E-10    | 3.04E-08    | down |
| 1014 | NTRK2      | 24.52935763 | -3.462085768 | 0.549657011 | -6.298629322 | 3.00E-10    | 1.76E-08    | down |
| 1015 | SLC6A1     | 22.45746183 | -3.479080336 | 0.459063945 | -7.578639911 | 3.49E-14    | 4.55E-12    | down |
| 1016 | ABCB11     | 299.4600409 | -3.491468965 | 0.47063367  | -7.418655288 | 1.18E-13    | 1.38E-11    | down |
| 1017 | SSTR3      | 11.18092237 | -3.541694321 | 0.682962589 | -5.185780857 | 2.15E-07    | 6.15E-06    | down |

Protect against lipid-induced htNSC senescence in ACP

|      |             |             |              |             |              |             |             |      |
|------|-------------|-------------|--------------|-------------|--------------|-------------|-------------|------|
| 1018 | GABRQ       | 315.4773753 | -3.554377971 | 0.333129097 | -10.66967132 | 1.41E-26    | 1.60E-23    | down |
| 1019 | CNGA3       | 9.18757445  | -3.577680062 | 0.545241448 | -6.561643606 | 5.32E-11    | 3.65E-09    | down |
| 1020 | HSD11B1     | 2.135236425 | -3.578447638 | 1.069676938 | -3.345353642 | 0.000821777 | 0.00706895  | down |
| 1021 | ATP2B2      | 70.03403383 | -3.607820041 | 0.452690909 | -7.96972056  | 1.59E-15    | 2.70E-13    | down |
| 1022 | CDH1        | 11.51796432 | -3.627919826 | 0.695730384 | -5.214548494 | 1.84E-07    | 5.40E-06    | down |
| 1023 | CACNG5      | 285.9086196 | -3.760972491 | 0.287308095 | -13.0903812  | 3.74E-39    | 1.90E-35    | down |
| 1024 | CMKLR1      | 2.430801005 | -3.787289194 | 1.449788285 | -2.612305005 | 0.008993398 | 0.046641952 | down |
| 1025 | GALP        | 2.484170776 | -3.814450487 | 1.264984333 | -3.015413224 | 0.002566294 | 0.017382669 | down |
| 1026 | AC008667.2  | 2.60073561  | -3.892097182 | 0.999690388 | -3.893302593 | 9.89E-05    | 0.001216373 | down |
| 1027 | GABBR2      | 66.31636622 | -3.893318832 | 0.710428279 | -5.480241912 | 4.25E-08    | 1.50E-06    | down |
| 1028 | CRABP1      | 39.79294284 | -3.914669066 | 0.734573603 | -5.329171987 | 9.87E-08    | 3.11E-06    | down |
| 1029 | COL3A1      | 75.06042921 | -3.936447018 | 1.012790033 | -3.88673554  | 0.000101601 | 0.001245457 | down |
| 1030 | GPR37L1     | 24.02881767 | -3.956778696 | 0.530446323 | -7.459338533 | 8.70E-14    | 1.04E-11    | down |
| 1031 | MYCN        | 37.29312913 | -4.126696169 | 0.956574877 | -4.314033607 | 1.60E-05    | 0.000259453 | down |
| 1032 | RPE65       | 44.06330872 | -4.145287835 | 0.550333557 | -7.532318871 | 4.98E-14    | 6.34E-12    | down |
| 1033 | FAM69C      | 53.07103289 | -4.199857873 | 0.741720005 | -5.662322498 | 1.49E-08    | 6.00E-07    | down |
| 1034 | FAM181A-AS1 | 14.78744802 | -4.225465704 | 0.583025219 | -7.247483583 | 4.25E-13    | 4.50E-11    | down |
| 1035 | TMEM132E    | 96.55633374 | -4.225993342 | 0.655879574 | -6.443245847 | 1.17E-10    | 7.49E-09    | down |
| 1036 | PLA2G3      | 5.875559121 | -4.373382044 | 1.255954604 | -3.48211793  | 0.000497465 | 0.004680627 | down |
| 1037 | FOXJ1       | 37.58766101 | -4.438156441 | 0.451678954 | -9.825909305 | 8.71E-23    | 5.37E-20    | down |
| 1038 | TNR         | 31.17826222 | -4.596946656 | 1.214108154 | -3.786274428 | 0.000152923 | 0.001746304 | down |
| 1039 | NR4A3       | 110.8568331 | -4.647099857 | 0.364159411 | -12.76116918 | 2.70E-37    | 9.17E-34    | down |
| 1040 | KCNJ10      | 109.8874696 | -4.677150804 | 0.604568911 | -7.736340257 | 1.02E-14    | 1.51E-12    | down |
| 1041 | PCSK9       | 7.031248567 | -4.679490659 | 1.225198023 | -3.819374969 | 0.00013379  | 0.001566477 | down |
| 1042 | AL354793.1  | 3.233276068 | -4.698737827 | 1.071965587 | -4.383291669 | 1.17E-05    | 0.000197199 | down |

Protect against lipid-induced htNSC senescence in ACP

|      |            |             |              |             |              |          |             |      |
|------|------------|-------------|--------------|-------------|--------------|----------|-------------|------|
| 1043 | FGFBP3     | 999.7476471 | -4.72223546  | 0.783490125 | -6.027179295 | 1.67E-09 | 8.03E-08    | down |
| 1044 | DBX2       | 3.69339694  | -4.899937948 | 0.91833694  | -5.335664651 | 9.52E-08 | 3.02E-06    | down |
| 1045 | LRP2       | 548.7260998 | -5.037284806 | 0.587877756 | -8.56859229  | 1.05E-17 | 2.51E-15    | down |
| 1046 | FAM181A    | 21.62935217 | -5.056915084 | 0.572887441 | -8.827065699 | 1.07E-18 | 3.04E-16    | down |
| 1047 | RPS27P16   | 2.720974503 | -5.352189166 | 1.02382128  | -5.227659624 | 1.72E-07 | 5.10E-06    | down |
| 1048 | KCNJ9      | 5.38053435  | -5.465175648 | 1.112703934 | -4.911617083 | 9.03E-07 | 2.18E-05    | down |
| 1049 | ADRA2B     | 2.985516762 | -5.487163939 | 1.369010606 | -4.008123762 | 6.12E-05 | 0.000811828 | down |
| 1050 | RALYL      | 18.11405213 | -5.597051504 | 0.775301647 | -7.219192069 | 5.23E-13 | 5.32E-11    | down |
| 1051 | NKAIN4     | 4.701083272 | -5.702130904 | 1.071559827 | -5.321336952 | 1.03E-07 | 3.24E-06    | down |
| 1052 | INHBB      | 17.42442787 | -6.030800123 | 0.813487412 | -7.413513761 | 1.23E-13 | 1.42E-11    | down |
| 1053 | PCSK2      | 10.23502449 | -6.415416433 | 1.103760801 | -5.812324944 | 6.16E-09 | 2.65E-07    | down |
| 1054 | AC009110.1 | 8.698248945 | -6.602621069 | 0.856066418 | -7.712743933 | 1.23E-14 | 1.77E-12    | down |
| 1055 | HES5       | 34.1255024  | -7.022552514 | 1.321261003 | -5.315038059 | 1.07E-07 | 3.34E-06    | down |



## MATERIALS AND METHODS

***Patients and Clinical Samples:*** Adamantinomatous craniopharyngioma (ACP) tissue specimens (n=65) were collected after tumorectomy performed at the Nanfang Hospital between 2014 and 2019 using either the traditional transcranial approach (TCA) or endoscopic endonasal approach (EEA). Tissue samples were as follows: 17 papillary craniopharyngioma (PCP) samples, 21 nonfunctional pituitary adenoma (NFPA) samples, 9 hypothalamic glioma samples, 10 frontal glioma samples, 8 tuberculum sellae meningioma samples and 3 temporal lobe epilepsy excision brain tissue samples (used as controls). In addition, a total of 20 ACP cystic fluid samples, and 7 PCP cystic fluid samples were collected intraoperatively. All patients have signed informed consent to participate in the study according to the ethical protocols of the Ethics Committee of Nanfang Hospital, Southern Medical University.

***Lipid detection in Cystic Fluids:*** Low Density Lipoprotein Cholesterol (LDL-C) was detected by an indirect method. First, we determined total cholesterol (TC) using the CHOD-PAP method, an enzymatic colorimetric assay. Briefly, samples were subjected to enzymatic hydrolysis and oxidation, and the formation of quinoneimine dye from hydrogen peroxide, 4-aminoantipyrine, and phenol in the presence of peroxidase was evaluated. To measure triglycerides (TGs), we used the GPO-PAP method. In this method, samples were hydrolyzed with lipases, and the formation of quinoneimine dye from hydrogen peroxide, 4-aminop-henazone, and 4-cholorophenol in the presence of peroxidase was determined. High density lipoprotein-cholesterol (HDL-C) was determined by HDL-C Immuno FS, a homogenous enzymatic colorimetric method. Briefly, antibodies against human lipoproteins were used to form antigen-antibody complexes with LDL (low density lipoproteins), VLDL (very low density lipoproteins), and Chylomicrons (CM), allowing HDL-C to be selectively determined by an enzymatic cholesterol measurement. Finally, LDL-C was estimated using Friedewald equation:  $[LDL-C] = [TC] - [HDL-C] - [TG/5]$ . The approximate value of LDL-C obtained was in mg/dl. To obtain LDL-C in mmol/l, the above

equation was modified by dividing TG by 2.2.

***Histology and Immunofluorescence Staining:*** Formalin-fixed paraffin-embedded (FFPE) tumor sections and mouse brain sections (3  $\mu\text{m}$  thickness) were prepared using a routine procedure. The sections were then stained with hematoxylin (ZSGB-BIO) and eosin (ZSGB-BIO) using a standard protocol. Immunohistochemical staining and immunofluorescence staining was performed using the established protocol as previously described<sup>1</sup>. Briefly, after deparaffinization and rehydration, antigen retrieval was performed by heating sections for 20 min in sodium citrate buffer (pH 6.0; Solarbio) or ethylenediaminetetraacetic acid (EDTA) (pH 8.0; ZSGB-BIO) in a microwave. Endogenous peroxidases were blocked by incubating the sections in 3% hydrogen peroxide for 10 min. Next, sections were blocked for 1 h in a blocking solution containing 10% goat serum (Thermo Fischer Scientific) in phosphate buffer solution (PBS; Solarbio), and then incubated with the primary antibodies overnight at 4°C. For immunohistochemical staining, the primary antibodies were detected using a Universal DAB Detection Kit (ZSGB-BIO), and the tissue sections were finally counterstained with hematoxylin (ZSGB-BIO) for 1 min. For immunofluorescence staining, the primary antibodies were detected using the corresponding fluorescent secondary antibodies. Nuclei were counterstained with 4',6-diamidino-2-phenylindole (DAPI) (Thermo Fischer Scientific) for 5 min at room temperature (RT). The primary and fluorescent secondary antibodies that were used in this study are listed in Supplementary Table 1 and Supplementary Table 3.

***BODIPY 493/503 Staining:*** BODIPY 493/503 staining was performed as previously described<sup>2</sup>. Briefly, mouse brain tissues and ACP tissue specimens were fixed in 4% paraformaldehyde (PFA; Solarbio) for 24 h, cryoprotected in 30% sucrose (Solarbio), and then sectioned (20  $\mu\text{m}$ ; sectioned coronally for mouse brain) using a freezing microtome (Leica). Sections were stored at -20°C. To stain lipid droplets, free-floating sections were washed twice in PBS (Solarbio) and incubated in PBS containing

## Protect against lipid-induced htNSC senescence in ACP

BODIPY 493/503 (1:1000 dilution in dimethylsulfoxide (DMSO; MP Bio); Thermo Fisher Scientific). Nuclei were counterstained with DAPI (1:1000; Thermo Fisher Scientific) for 15 min at RT. Sections were mounted and embedded on microscope slides. Note that for successful lipid-droplet staining, antigen retrieval procedures and treatment with detergents must be avoided, and sections should be embedded while still wet.

***Oil Red O Staining and Filipin Staining:*** ACP tissues were first fixed with 4% PFA (Solarbio), cryoprotected in 30% sucrose (Solarbio) and then embedded in tissue freezing medium (OCT; Sakura). The ACP tissues were sectioned (20  $\mu$ m) and stored at -20°C. For oil red O (ORO) staining, the sections were immersed in ORO working solution (Sigma-Aldrich) for 20-30 min at RT, and then washed with 60% isopropanol (Aladdin) to remove unbound dye and counterstained with hematoxylin (ZSGB-BIO). Finally, images were captured by using a light microscope (Olympus; Japan). The cholesterol-binding compound filipin III (Sigma-Aldrich) was used to determine the cholesterol content. The ACP tissue slices were first fixed. Then, filipin staining (0.05 mg/mL filipin in a 1:4 solution of DMSO: PBS) was performed for 2 h at RT, and staining was examined using fluorescence microscopy (Olympus, Japan).

***Purification of CD133<sup>+</sup> NSCs:*** Cells positive for CD133 surface marker were isolated from the 3VF adjacent to ACP and from the relatively normal SVZ far away from frontal glioma using the Indirect CD133 MicroBead Kit (Miltenyi Biotec) according to the manufacturer's instructions. To obtain the relatively normal NSCs of SVZ far away from frontal glioma, we first obtained relatively normal SVZ tissues according to the preoperative contrast-enhanced T1-weighted MRI sequence and the assistance of the surgeon during the operation and confirmed by the pathologist after the operation. The obtained SVZ tissues were subjected to Magnetic-Activated Cell Sorting (MACS) and then the sorted NSCs were used for subsequent experiments. To prepare single-cell suspensions, the tissues were incubated with 0.25% papain

## Protect against lipid-induced htNSC senescence in ACP

(Worthington Biochemical) for 30 min at 37°C and then gently triturated approximately 10 times using fire-polished tips. Next, cells were centrifuged, resuspended in PBS (Solarbio), incubated with CD133 (monoclonal antibody; MAb) conjugated to super paramagnetic microbeads (Indirect CD133 MicroBead Kit; Miltenyi Biotec), washed, and then separated using a MACS Column (Miltenyi Biotec) to obtain purified CD133<sup>+</sup> cells. These CD133<sup>+</sup> cells were used for further analysis.

***Transmission Electron Microscopy (TEM):*** The NSCs were isolated from the 3VF adjacent to ACP and from the relatively normal SVZ far away from frontal glioma using the Indirect CD133 MicroBead Kit (Miltenyi Biotec). Next, the cells were fixed for 30 min in 2% glutaraldehyde (Sigma-Aldrich) and 4% PFA (Solarbio) in 0.1 M phosphate buffer solution (PBS; Solarbio) (pH 7.4), treated with 10% gelatin solution (Macklin) in sodium cacodylate buffer (Sigma-Aldrich), and incubated with 2% osmium tetroxide (Electron Microscopy Sciences) for 30 min at RT. Cell pellets were stained en-bloc with 1% uranyl acetate (Electron Microscopy Sciences) for 30 min, followed by dehydration in graded ethanol (VWR Chemicals) series 50%, 70%, 85%, 95%, 100%, 100%. Finally, the cells were embedded in the epoxy resin (Macklin). Sections (50 nm) were cut using a Leica EM UC7 ultramicrotome (Leica Microsystems), placed on grids, and stained with 2% uranyl acetate and Reynold's lead citrate (Macklin). Grids were imaged with a JEM 1400 transmission electron microscope (JEOL) at 80 kV using the Gatan Microscopy Suite software (Gatan). Images were quantified using the ImageJ software (NIH) by an investigator blinded to experimental conditions.

***Gas Chromatography:*** The CD133<sup>+</sup> cells were isolated from the 3VF adjacent to ACP and from the relatively normal SVZ far away from frontal glioma using the Indirect CD133 MicroBead Kit (Miltenyi Biotec). Cells were washed with PBS (Solarbio), placed on dry ice, and lipid extraction from frozen cell pellets was performed using

## Protect against lipid-induced htNSC senescence in ACP

the standard Folch method. Cell pellet aliquot was lysed with NaOH (0.1M) and total cell protein was quantified using the Bradford assay. Triglycerides, cholesterol, and cholesteryl esters were directly analyzed by GC as previously described<sup>3</sup>. Briefly, lipids were separated using a GC-2010 gas chromatograph (Shimadzu) equipped with a programmed temperature vaporizer injector and a ZB-5HT capillary column (15 m × 0.32 mm × 0.1 μm; Phenomenex). Tri-decanoyl glycerol (Sigma- Aldrich), cholesteryl myristate (Sigma-Aldrich), and Tri-nonadecanoyl glycerol (Sigma-Aldrich) were used as standards for free, esterified cholesterol, and triglycerides, respectively. For fatty acid analysis, FOLCH-extracts were trans-esterified using the boron trifluoride-methanol solution (Sigma-Aldrich) at 80°C for 2 h followed by extraction with hexane. Lipids were separated on a ZB-FFAP capillary column (15m × 0.32mm × 0.25μm; Phenomenex) using pentadecanoin (Sigma-Aldrich) as a standard. Chromatograms were analyzed using GC Solutions 2.3 (Shimadzu) and values were normalized to total cell protein.

***Sample Collection and RNA-seq Analysis Preparation:*** Briefly, To test whether high content of lipids was originated from ACP cells, the ACP tissues (n=5), PCP tissues (n=4) and NFPA (n=3) tissues were prepared and sequenced. For NSCs senescence sequencing, CD133<sup>+</sup> NSCs from the 3VF adjacent to ACP (n=7) and from the relatively normal SVZ far away from frontal glioma (n=4) were prepared. A total amount of 1 μg RNA per sample was used as input material for RNA sample preparations. Sequencing libraries were generated using NEB Next<sup>®</sup> Ultra RNA Library Prep Kit for Illumina<sup>®</sup> (NEB, USA) following manufacturer's recommendations, and index codes were added to attribute sequences to each sample. Briefly, mRNA was purified from total RNA using poly-T oligo-attached magnetic beads. Fragmentation was carried out using divalent cations under elevated temperature in NEBNext First Strand Synthesis Reaction Buffer (5 ×). First-strand cDNA was synthesized using random hexamer primer and M-MuLV Reverse Transcriptase (RNase H<sup>-</sup>). Second-strand cDNA synthesis was subsequently

## Protect against lipid-induced htNSC senescence in ACP

performed using DNA polymerase I and RNase H. Remaining overhangs were converted into blunt ends using exonuclease/polymerase activity. After the adenylation of 3' ends of DNA fragments, NEBNext Adaptor with hairpin loop structure was ligated to prepare for hybridization. To preferentially select cDNA fragments of 250~300 bp in length, the library fragments were purified with the AMPure XP system (Beckman Coulter, Beverly, USA). Next, 3  $\mu$ L USER Enzyme (NEB, USA) was used with size-selected, adaptor-ligated cDNA at 37°C for 15 min followed by 5 min at 95°C before PCR. PCR was performed using Phusion High-Fidelity DNA polymerase, Universal PCR primers, and Index (X) Primer. Finally, PCR products were purified (AMPure XP system) and library quality was assessed on the Agilent Bioanalyzer 2100 system.

***Clustering and Sequencing:*** The clustering of the index-coded samples was performed on a cBot Cluster Generation System using TruSeq PE Cluster Kit v3-cBot-HS (Illumina) according to the manufacturer's instructions. After cluster generation, the library preparations were sequenced on an Illumina Novaseq platform and 150 bp paired-end reads were generated.

***Quality Control:*** First, raw data (raw reads) of fastq format were processed through in-house perl scripts. In this step, clean data (clean reads) were obtained by removing reads containing adapter, reads containing ploy-N, and low quality reads from raw data. At the same time, Q20, Q30, and GC content of the clean data was calculated. All downstream analyses were based on the clean data with high quality.

***Reads Mapping To the Reference Genome:*** Reference genome and gene model annotation files were downloaded directly from the genome website. Index of the reference genome was built using Hisat2 v2.0.5, and paired-end clean reads were aligned to the reference genome using Hisat2 v2.0.5.

**Quantification of Gene Expression Levels:** Feature Counts v1.5.0-p3 was used to count the reads numbers mapped to each gene. Next, FPKM of each gene was calculated based on the length of the gene and reads count mapped to this gene.

**Differential Expression Analysis:** Differential expression analysis of two groups was performed using the DESeq2 R package (1.16.1). The *p*-values were adjusted using the Benjamini and Hochberg's approach for controlling the false discovery rate. Genes with an adjusted *p*-value <0.05 found by DESeq2 were assigned as differentially expressed. Next, we adopted GSEA for functional annotation.

**Primary Cell Culture:** Primary htNSCs were isolated using the established protocol as previously described<sup>4-6</sup>. Briefly, the hypothalamic tissues were dissected from newborn C57BL/6J mice, cut into small pieces (approximately 1 mm<sup>3</sup>), digested with 0.25% papain (Worthington Biochemical) for 30 min at 37°C, and then gently triturated approximately 10 times using fire-polished tips. Next, cells were centrifuged, resuspended in growth medium containing Neurobasal-A (Thermo Fischer Scientific), 2% B27 without vitamin A (Thermo Fischer Scientific), 20 ng/mL EGF (PeproTech), 20 ng/mL bFGF (PeproTech), and 1% penicillin/streptomycin (Thermo Fischer Scientific), seeded in ultra-low adhesion 6-well plates (Corning) at a density of 1×10<sup>5</sup> cells per well, and then incubated in 5% CO<sub>2</sub> at 37°C. On day 7, the neurospheres were collected by centrifugation, dissociated into single cells by trypsinization using TrypLE™ express enzyme (Thermo Fischer Scientific), and then passaged and maintained in neurosphere culture until experimental use. To determine the neurosphere number, the neurospheres were cultured in 24-well plates and then counted under a microscope. To quantify the neurosphere size, the images were obtained using a microscope and the diameter of neurospheres was measured using the ImageJ software (NIH). For *in vitro* experiments, htNSCs were treated with cystic fluid (87.301 mg/L), ox-LDL (100 mg/L), SSO (0.2 mM), ISRIB (200 nM),



## Protect against lipid-induced htNSC senescence in ACP

GSK2606414 (2  $\mu$ M), OXT (1  $\mu$ M), or OTRA (1  $\mu$ M).

***HtNSCs Characterization and Lipid Content Assays:*** The htNSCs differentiation and senescence assays were performed according to the established protocol as previously described<sup>4,5</sup>. Briefly, for the htNSC differentiation assay, neurospheres were collected by centrifugation, dissociated into single cells by trypsinization using TrypLE™ express enzyme (Thermo Fischer Scientific), and then single cells were seeded on coverslips coated with Poly-L-ornithine (Sigma-Aldrich) and placed in 6-well plates (Corning). The cells were cultured in the differentiation medium containing Neurobasal-A (Thermo Fischer Scientific), 2% B27 supplement (Thermo Fischer Scientific), 0.5% fetal bovine serum (FBS; Thermo Fischer Scientific), 5  $\mu$ M retinoic acid (Sigma-Aldrich), and 1% penicillin-streptomycin (Thermo Fischer Scientific). The differentiation medium was changed every two days, and neural differentiation was induced in about one week. For the cell senescence assay, the dissociated single cells were seeded in 6-well plates (Corning) coated with Poly-L-ornithine (Sigma-Aldrich). Cells were cultured for 72 h with different treatments and senescent cells were stained using a senescence  $\beta$ -galactosidase staining Kit (Cell Signaling Technology, #9860) according to the manufacturer's instructions. For the BODIPY 581/591 C11 lipid peroxidation assay, the dissociated single cells were seeded on coverslips coated with Poly-L-ornithine (Sigma-Aldrich) and placed in 6-well plates (Corning). After 24 h, htNSCs were incubated in HBSS (Thermo Fischer Scientific) containing different treatments for another 72 h. Next, htNSCs were incubated with 2  $\mu$ M BODIPY 581/591 C11 for 1 h, washed with HBSS (Thermo Fischer Scientific), and then imaged live in HBSS using the Nikon spinning disk confocal microscope and Zeiss LSM 980. Images were taken using both green and red channels. Relative lipid peroxidation was determined as the ratio of green fluorescence intensity over red fluorescence intensity, with background subtracted, using the ImageJ software (NIH). For htNSC lipid staining, the dissociated single cells were seeded in 6-well plates (Corning) coated with Poly-L-ornithine (Sigma-Aldrich). Cells were cultured for 72 h

## Protect against lipid-induced htNSC senescence in ACP

with different treatments, washed with PBS (Solarbio), dipped into 60% isopropanol three times, and then stained with 0.3% Oil Red O dye (Sigma-Aldrich) solution dissolved in 60% isopropanol for 10 min. Next, cells were washed with 75% isopropanol for 1 min and then covered with PBS (Solarbio). The deposition of lipid droplets in htNSCs was observed using the Olympus BX63 microscope (Japan). Images were obtained in a blinded manner and analyzed with the ImageJ software (NIH). To quantify lipid content, the ratio of ORO-positive area versus the total area was calculated.

***Immunocytochemistry (ICC):*** The neurospheres were collected by centrifugation, dissociated into single cells by trypsinization using the TrypLE™ express enzyme (Thermo Fischer Scientific), and the cells were then seeded on coverslips coated with Poly-L-ornithine (Sigma-Aldrich) and placed in 6-well plates (Corning). After 24 h, htNSCs were fixed with 4% PFA (Solarbio) for 15 min at RT, permeabilized with 0.3% Triton X-100 solution (Solarbio) for 10 min, blocked with 10% goat serum (Thermo Fischer Scientific) for 1 h, and then incubated with primary antibodies at 4°C overnight. Primary antibodies were detected using corresponding fluorescent secondary antibodies as described in Histology and Immunofluorescence Staining. Nuclei were counterstained with DAPI (Thermo Fischer Scientific).

***Western Blot:*** Cells were lysed in the RIPA lysis buffer (Beyotime) containing protease/phosphatase inhibitor cocktail (Coolaber) according to the manufacturer's protocol. Lysates were sonicated for 10 min and then centrifugated at 4°C for 15 min at 12,000× g. Protein concentrations were determined using the BCA Protein Assay Kit (Solarbio) and the protein samples were heated at 100°C for 5 min. Denatured protein samples (30 µg per lane) were separated using 10% sodium dodecyl sulphate-polyacrylamide gel electrophoresis (SDS-PAGE) and then transferred onto polyvinylidene fluoride (PVDF) membranes (MERCK Millipore). The PVDF membranes were blocked with 5% bovine serum albumin (BSA; Sigma-Aldrich) for 1

## Protect against lipid-induced htNSC senescence in ACP

h at 25–28°C and then probed with primary antibodies overnight at 4°C. Next, the membranes were incubated with horseradish peroxidase (HRP)-conjugated goat anti-mouse IgG or goat anti-rabbit IgG antibodies (Jackson ImmunoResearch) for 1 h at 25–28°C. The bands were visualized using the enhanced chemiluminescence (ECL) Plus blot kit (MERCCK Millipore), scanned with a ChemiDoc XRS System, and analyzed using the ImageJ software (NIH). The primary and secondary antibodies that were used in Western blot are listed in Supplementary Table 2 and Supplementary Table 3.

***RNA Extraction and Quantitative real-time PCR:*** Total RNA was extracted from cells or tissues using the RNAiso Plus reagent (TaKaRa) according to the manufacturer's instructions. First-strand cDNA was prepared by reverse transcription using PrimeScript™ RT reagent Kit (TaKaRa) and oligo (dT) primers and then stored at -20°C. The RT-PCR analysis was performed using the TB Green® Premix Ex Taq™ II (TaKaRa) and Applied Bio-systems 7500 Fast Real-Time PCR System (Applied Biosystems, Foster City, CA, USA). Each measurement was performed in triplicate, and the results were normalized to GAPDH (internal control). The relative expression of the target genes was determined by the  $2^{-\Delta\Delta Ct}$  method. The specific primers used in this study are summarized in Supplementary Table 4.

***Animals Models:*** Adult (6~8 weeks) and neonatal C57BL/6 mice were obtained from the Southern Medical University Animal Center (Guangzhou, China). Neonatal mice were used for the isolation of primary htNSCs, while adult mice were subjected to hypothalamic localization injection and lateral ventricular (LV) localization injection. In the first experiment, mice were divided into four groups: control group, sham group, cystic fluid group, cystic fluid + BAY 11-7082 (Selleck) group. The cystic fluid (1.747 mg/μL) and BAY 11-7082 (25 μg/μL) were delivered to bilateral ventromedial nucleus of the hypothalamus (VMH) by stereotactic microinjection (stereotaxic coordinate was as follows, AP: -1.58 mm from bregma, ML: ±0.3 mm,

## Protect against lipid-induced htNSC senescence in ACP

DV: -5.5 mm below the surface of the skull). After stereotaxic microinjection, mice were continued to feed for another 8 weeks before being euthanized and their brain tissues were used for histological analysis. In the second experiment, mice were divided into 8 groups: control group, sham group, cystic fluid group, ox-LDL (Solarbio) group, ox-LDL + SSO (MCE) group, ox-LDL + OXT (R&D Systems) group, ox-LDL + ISRIB (Selleck) group, and ox-LDL + GSK2606414 (Selleck) group. The drugs or inhibitors were administered to adult mice *via* intracerebroventricular osmotic minipumps (RWD Life Science) as previously described<sup>7</sup>. Each minipump was positioned subcutaneously in the scapular region and attached to an infusion cannula targeting the left/right LV (stereotaxic coordinates for implantation of infusion cannula: AP: -0.34 mm from bregma, ML: ±1.0 mm, DV: -2.5 mm below the surface of the skull; (Paxinos and Franklin, 2001) via polyethylene tubing). When mice were given two drugs, they were administered from each side of the LV. The minipumps were filled with the vehicle (DMSO), cystic fluid (1.747 mg/μL), ox-LDL (2 mg/μL), SSO (4 μg/μL), ISRIB (0.4 μg/μL), GSK2606414 (2 μg/μL), or OXT (20 ng/μL). The drugs or inhibitors were injected at the rate of 0.25 μl/h for 3 months. To minimize the possibility of drug degradation inside the reservoirs, the osmotic minipumps filled with drugs were changed weekly. The body weight of the mice was measured zero, one, two, and three months after the LV localization injection. The mice were euthanized at week 12, and their brain tissues were used for histological analysis and qRT-PCR analysis. All animals were maintained on a 12-h light/dark cycle at 23°C with food and water available *ad libitum*. All animal studies were performed according to the National Institutes of Health *Guide for the Care and Use of Laboratory Animals* and approved by the Experimental Animal Committee of the Nanfang Hospital, Southern Medical University.

***Morris Water Maze (MWM)***: The Morris water maze (MWM) was used to evaluate the spatial learning and memory performance of mice at week 8 after the LV localization injection. according to the previously published methods<sup>8</sup>. The maze

## Protect against lipid-induced htNSC senescence in ACP

consisted of a large circular pool (120 cm in diameter, 45 cm in height, filled to a depth of 30 cm with opaque water containing nontoxic, white chalk at  $28 \pm 1$  °C) and divided into four equal-sized quadrants. Large visual cues surrounded the maze to make this a hippocampus-dependent task. A white platform (5 cm in diameter) was submerged and placed 1 cm below the water surface in the center of the target quadrant to provide an escape zone. All mice were given access to four training trials each day for five straight days in order to evaluate their capacity for spatial learning. Throughout the training session, the platform's position was held constant. The mice freely swam into the water along the four-quadrant pool wall in turn throughout the location navigation test. A maximum of 60 s were given to each mouse to locate the submerged white platform. The mice's discovery of the concealed platform was timed, and that information served as the escape latency time. The mouse is manually directed to the platform and given 30 s to rest if the mouse fails to find the platform within 60 s, and the escape latency time is then recorded as 60 s. The escape latency time to find the hidden platform of each mouse was recorded. On day 6, mice were put through a 60-s spatial probe experiment in which the platform was taken away to test their capacity for spatial memory. The numbers of crossing original platform's location was assumed to be a measure of their spatial memory. The number of entries to platform location were recorded. A digital camera placed immediately above the water maze was used to record all behaviors of the mice took, and the data fed back to the computer was analyzed.

***Mitochondria Fragmentation and Surface Area Assay:*** Mouse htNSCs were incubated with different treatments for 72 h, fixed with 4% PFA (Solarbio), stained for TOMM20 to label mitochondria, and then imaged using the Zeiss 980 LSM. Images of TOMM20-labelled cells were scored for mitochondrial fragmentation (“fragmented” or “non-fragmented”) by a blinded investigator. The standard deviation was calculated based on the binomial distribution,  $\sqrt{np(1-p)}$  where n was the number of cells and p was the fraction of fragmented cells. For mitochondrial surface

## Protect against lipid-induced htNSC senescence in ACP

area analysis, single confocal slices with the highest mitochondrial signal were used for quantification. Within ImageJ, a mask of the cell outline was made in such way that all pixels inside the htNSCs were equal to one and all pixels outside were null. Similarly, the mitochondria were thresholded in such way that all pixels inside the mitochondria were one and all pixels outside were null. The sum of all pixels was then measured for both images, essentially reporting the area occupied by either the total cell footprint or mitochondrial footprint. The ratio of the two was reported.

***Quantitative Analysis of Immunohistological Data:*** To evaluate the damage of the hypothalamus adjacent to ACP, PCP, meningioma and hypothalamic glioma, the distance from tumor margin to the margin of NF and MBP positive expression was calculated. To assess the number of SOX2<sup>+</sup> NSCs per hypothalamus area, SOX2<sup>+</sup> NSCs from six randomly selected visual fields per patient were counted using the ImageJ software (NIH) and normalized to the corresponding hypothalamus area. To analyze the percentage of  $\gamma$ -H2AX<sup>+</sup> NSCs, the number of total SOX2<sup>+</sup> cells and  $\gamma$ -H2AX<sup>+</sup>SOX2<sup>+</sup> cells was counted using the ImageJ software (NIH), and the percentage of  $\gamma$ -H2AX<sup>+</sup> NSCs was calculated. The percentage of p21<sup>+</sup> NSCs, p16<sup>+</sup> NSCs, Ki-67<sup>+</sup> NSCs, MCM2<sup>+</sup> NSCs, Lamin B1<sup>+</sup> NSCs, and H3K9Me3<sup>+</sup> NSCs was calculated as described above. Similarly, the percentage of GPR50<sup>+</sup>Nestin<sup>+</sup> NSCs, SOX2<sup>+</sup>Rx<sup>+</sup> NSCs, EAAT1<sup>+</sup>Nestin<sup>+</sup> NSCs, Vimentin<sup>+</sup>Connexin 43<sup>+</sup> NSCs, SOX2<sup>+</sup>SOX9<sup>+</sup> NSCs, SOX2<sup>+</sup>SOX10<sup>+</sup> NSCs, SOX2<sup>+</sup>Olig2<sup>+</sup> NSCs, CD36<sup>+</sup>Nestin<sup>+</sup> NSCs, and CD36<sup>+</sup>IBA-1<sup>+</sup> microglia was also calculated as described above. To analyze the percentage of SA- $\beta$ -gal<sup>+</sup> NSCs, the number of total cells and SA- $\beta$ -gal<sup>+</sup> cells was counted using the ImageJ software (NIH), and the percentage of SA- $\beta$ -gal<sup>+</sup> NSCs was calculated. To assess the percentage of  $\beta$ 3-Tubulin<sup>+</sup> NSCs, the number of total DAPI<sup>+</sup> cells and  $\beta$ 3-Tubulin<sup>+</sup> cells was counted using the ImageJ software (NIH), and the percentage of  $\beta$ 3-Tubulin<sup>+</sup> NSCs was calculated. To quantify the number of BODIPY<sup>+</sup> LDs, BODIPY<sup>+</sup> LDs in every single cell per group was counted using the ImageJ software (NIH). To evaluate the expression of ZO-1 in the hypothalamus of

## Protect against lipid-induced htNSC senescence in ACP

mouse brain in each group, the fluorescence intensity of ZO-1 in the ependymal layer was analyzed by using the ImageJ software (NIH), and the fold change of the fluorescence intensity of ZO-1 in each group compared to the control group was calculated. To assess the number of CD169<sup>+</sup> cells in hypothalamus area, CD169<sup>+</sup> cells from six randomly selected visual fields per animal were counted using the ImageJ software (NIH). The number of POMC<sup>+</sup> neurons, GFAP<sup>+</sup> astrocytes, IBA-1<sup>+</sup> microglia, and SMI-32<sup>+</sup> axonal spheroids was calculated in a similar manner. To analyze the expression of NPY in the hypothalamus of mouse brain in each group, the fluorescence intensity of NPY in the arcuate nucleus (ARC) was analyzed using the ImageJ software (NIH), and the fold change of the fluorescence intensity of NPY in each group compared to the control group was calculated. The expression of GnRH and IBA-1 was calculated in a similar manner.

**Statistical Analysis:** Data are presented as the mean  $\pm$  SEM. Statistical analyses were performed using GraphPad Prism (version 8.0, GraphPad Software, San Diego, CA) and IBM SPSS (version 20.0, IBM, Chicago, IL, USA). Each group of data was subjected to Kolmogorov-Smirnov test or D'Agostino-Pearson omnibus test for normal distribution when applicable. *p*-values for normally distributed data were calculated using either the Student's *t*-test for two groups or one-way ANOVA with Fisher's LSD *post hoc* analysis when three or more groups were tested. Data that were not normally distributed were analyzed using the non-parametric Mann-Whitney U test or the uncorrected Dunn's test. Differences were considered statistically significant at  $p < 0.05$ . All statistical details regarding *p*-values and *n* values are specified in main and supplementary figure legends. Significance was defined as \* $p < 0.05$ , \*\* $p < 0.01$ , \*\*\* $p < 0.001$ . Different groups of mice were allocated in a randomized manner and investigators were blinded to the allocation of different groups when performing surgeries and subsequent outcome evaluations. Exclusion criteria were based on animal well-being at the beginning of the study. No animals were excluded from the study. No power analysis was performed to determine the

sample size. The sample size for each study was based on previous animal studies in our lab.

## References

1. Wang CH, Qi ST, Fan J, et al. Identification of tumor stem-like cells in admanatimomatous craniopharyngioma and determination of these cells' pathological significance. *J Neurosurg* 2019;1-11.
2. Ioannou MS, Jackson J, Sheu SH, et al. Neuron-Astrocyte Metabolic Coupling Protects against Activity-Induced Fatty Acid Toxicity. *Cell* 2019;177:1522-1535.e1514.
3. Röhrl C, Eigner K, Winter K, et al. Endoplasmic reticulum stress impairs cholesterol efflux and synthesis in hepatic cells. *J Lipid Res* 2014;55:94-103.
4. Xiao YZ, Yang M, Xiao Y, et al. Reducing Hypothalamic Stem Cell Senescence Protects against Aging-Associated Physiological Decline. *Cell Metab* 2020;31:534-548.e535.
5. Li J, Tang Y, Cai D. IKK $\beta$ /NF- $\kappa$ B disrupts adult hypothalamic neural stem cells to mediate a neurodegenerative mechanism of dietary obesity and pre-diabetes. *Nat Cell Biol* 2012;14:999-1012.
6. Zhang Y, Kim MS, Jia B, et al. Hypothalamic stem cells control ageing speed partly through exosomal miRNAs. *Nature* 2017;548:52-57.
7. Havranek T, Zatkova M, Lestanova Z, et al. Intracerebroventricular oxytocin administration in rats enhances object recognition and increases expression of neurotrophins, microtubule-associated protein 2, and synapsin I. *J Neurosci Res* 2015;93:893-901.
8. Wang BN, Wu CB, Chen ZM, et al. DL-3-n-butylphthalide ameliorates diabetes-associated cognitive decline by enhancing PI3K/Akt signaling and suppressing oxidative stress. *Acta Pharmacol Sin* 2021;42:347-360.
